# Supplementary material for: Biomass carbon emissions from nickel mining have significant implications for climate action
Source: Research Square preprint supplement (doi:10.21203/rs.3.rs-2469411/v1), 2023-02-01
Supplement: Supplementary file 1 [file 132827ce097e18a066a529d0.docx]

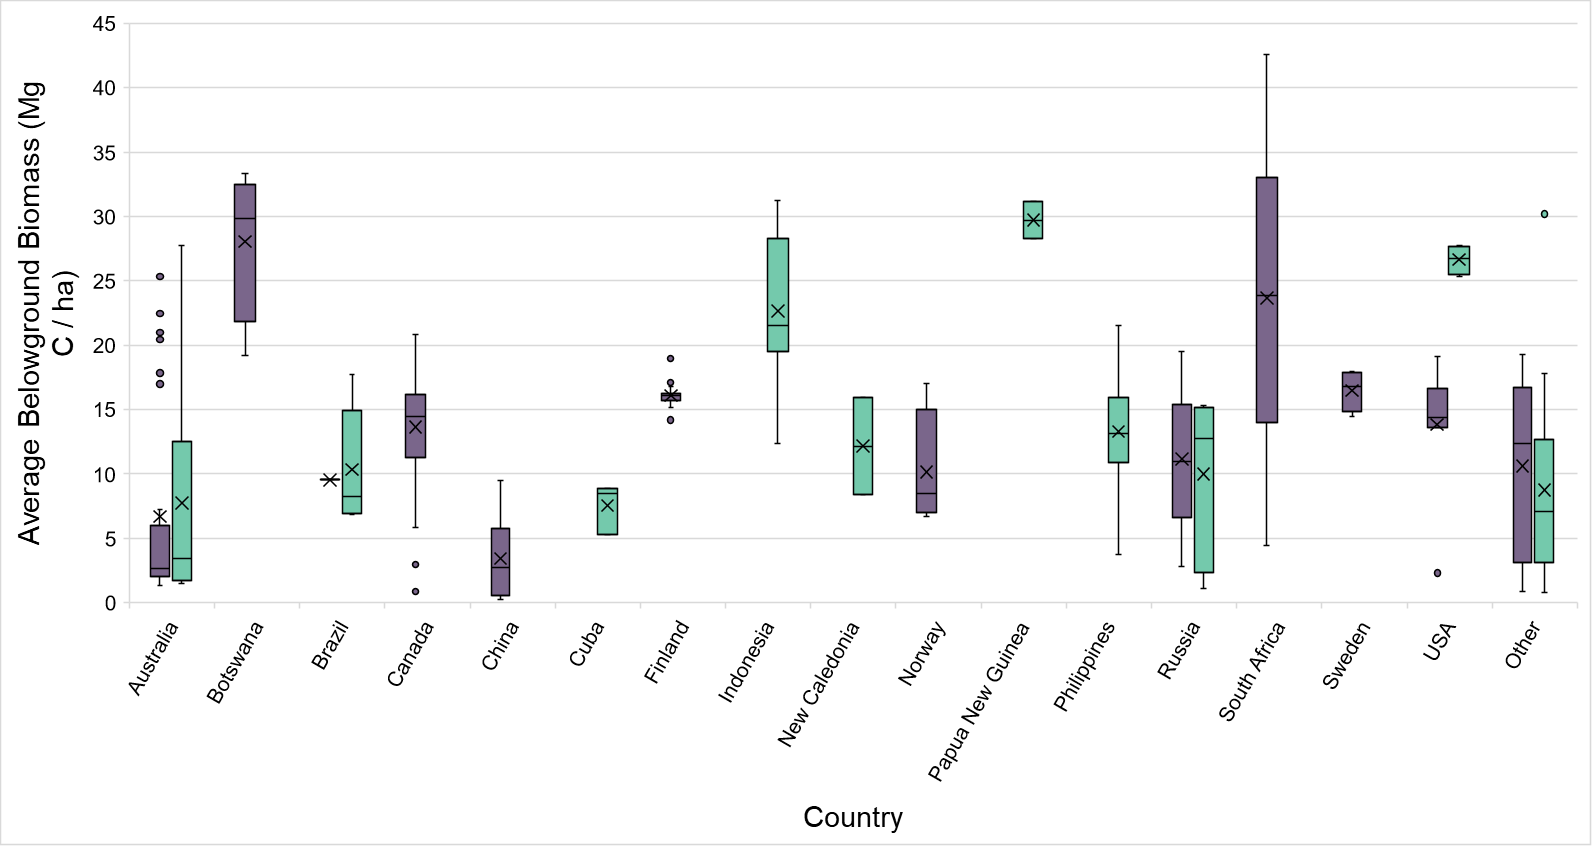


Fig. S1.

Belowground biomass carbon densities (Mg C / ha) for undeveloped nickel deposits. The carbon biomass densities are the average values from the Spawn *et al.* (*14*) dataset within 5 km radius circles around the coordinates of the deposits. Sulfide deposits are shown in purple while laterite deposits are shown in turquoise. The box-and-whisker plots show the mean (x), median (line), and upper and lower quartiles (whiskers). If there are any statistical outliers, these are shown as dots above or below the whiskers.


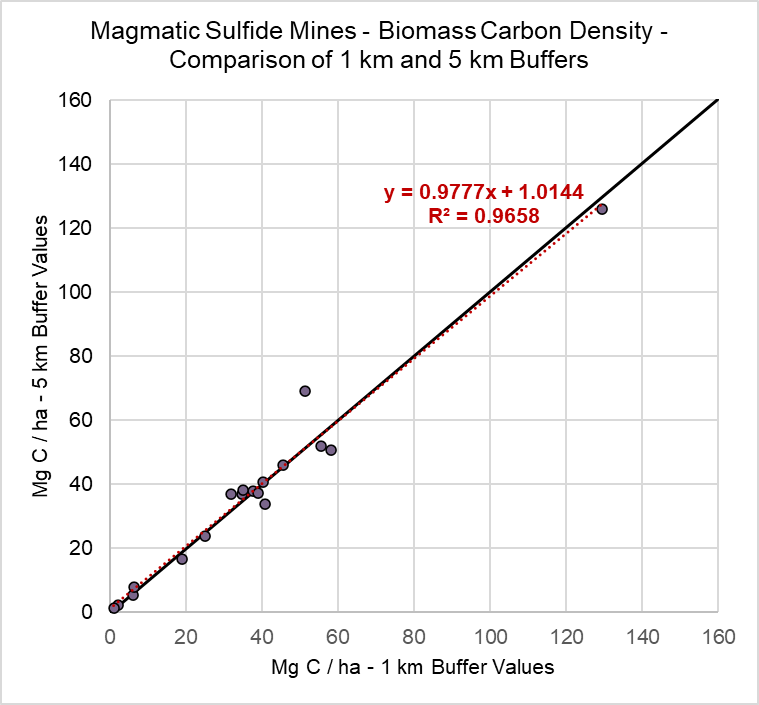


**A**


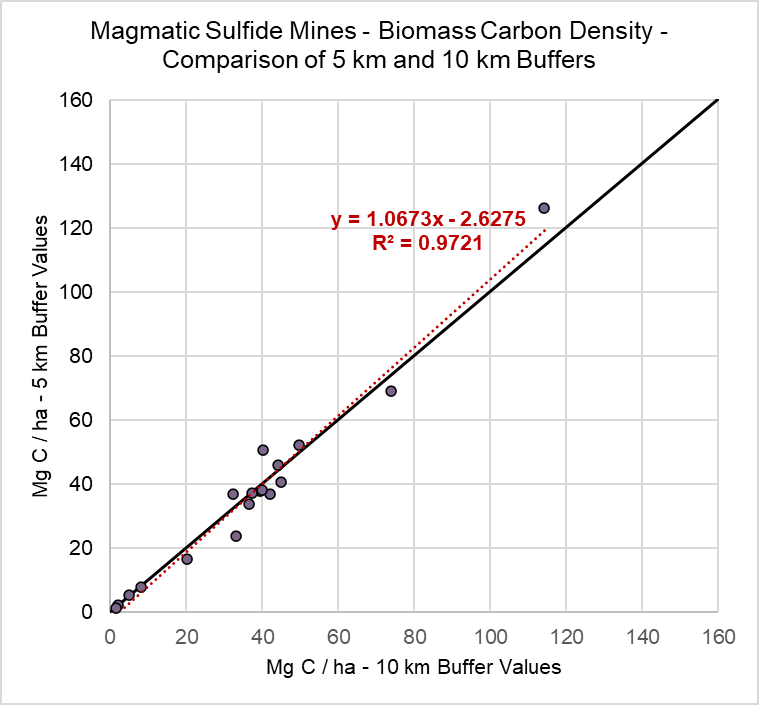


**B**

Fig. S2.

Sensitivity analysis comparing biomass carbon density calculations (including aboveground and belowground biomass) for 1 km and 5 km (A) and 5 km and 10 km (B) buffers for magmatic sulfide nickel mines.


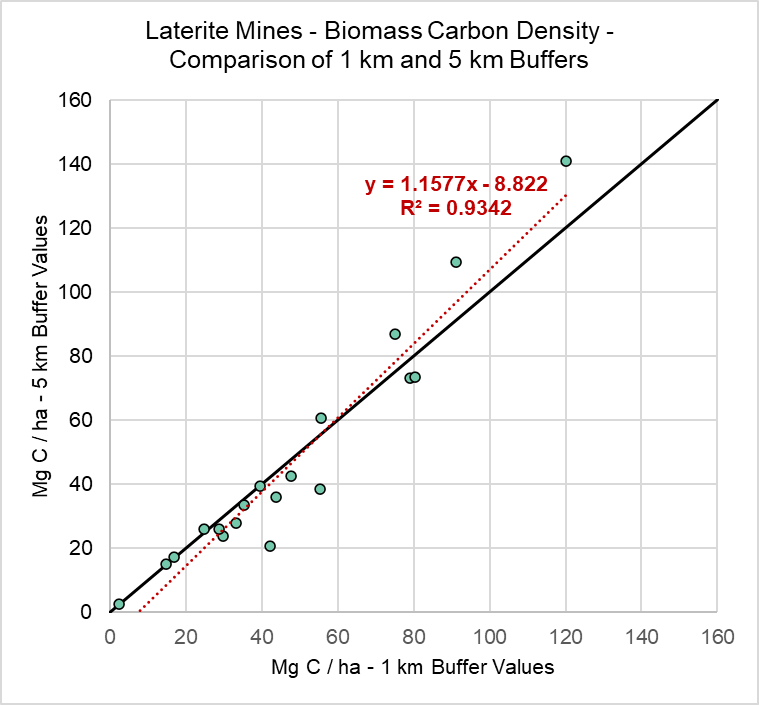


**A**


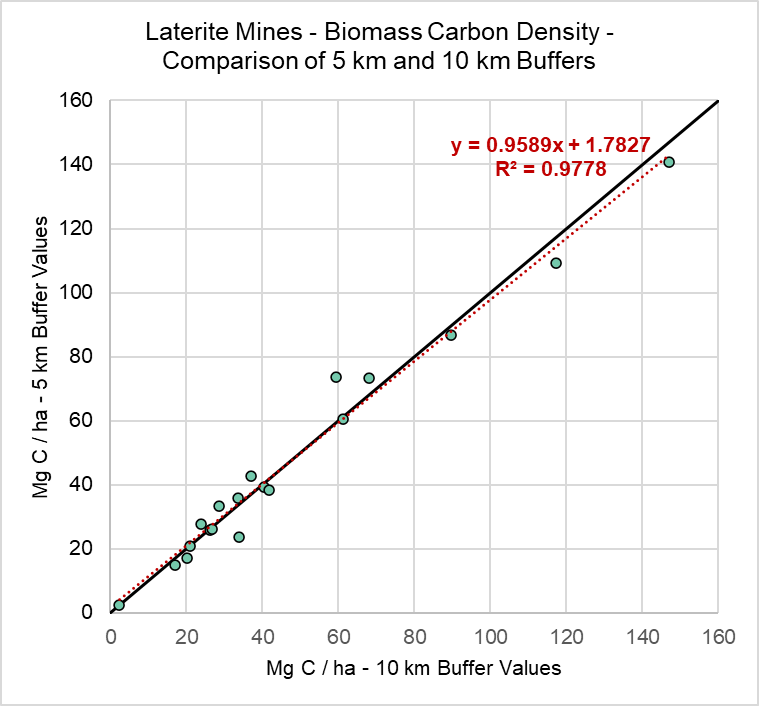


**B**

Fig. S3.

Sensitivity analysis comparing biomass carbon density calculations (including aboveground and belowground biomass) for 1 km and 5 km (A) and 5 km and 10 km (B) buffers for laterite nickel mines.


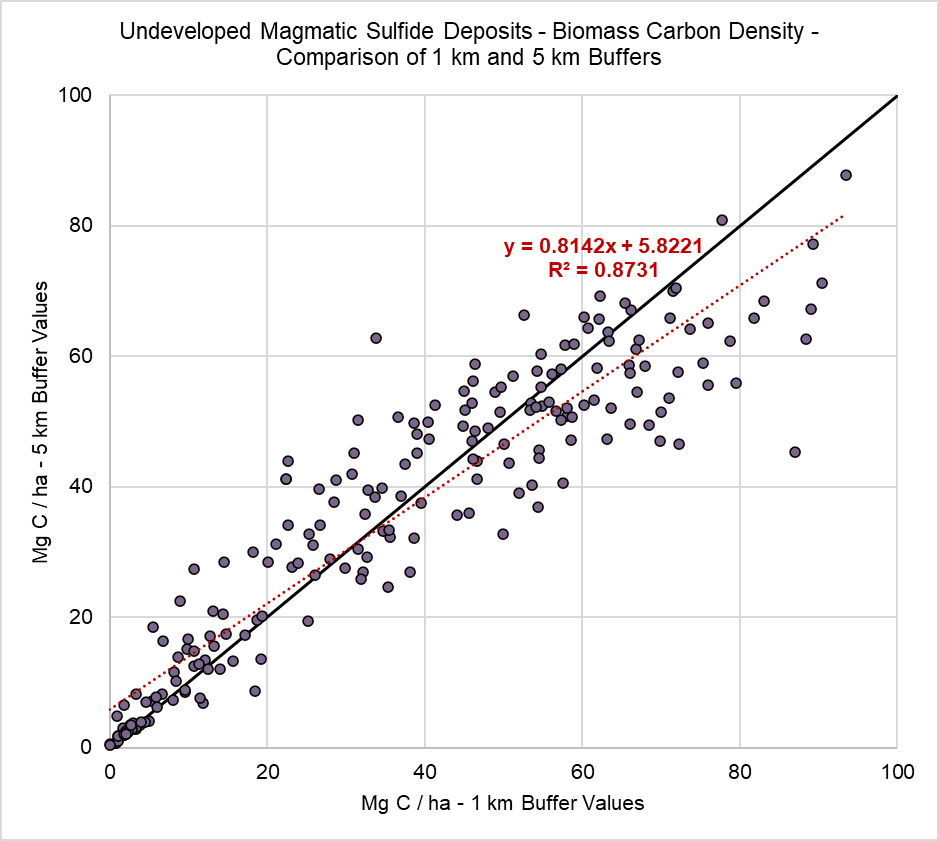


**A**


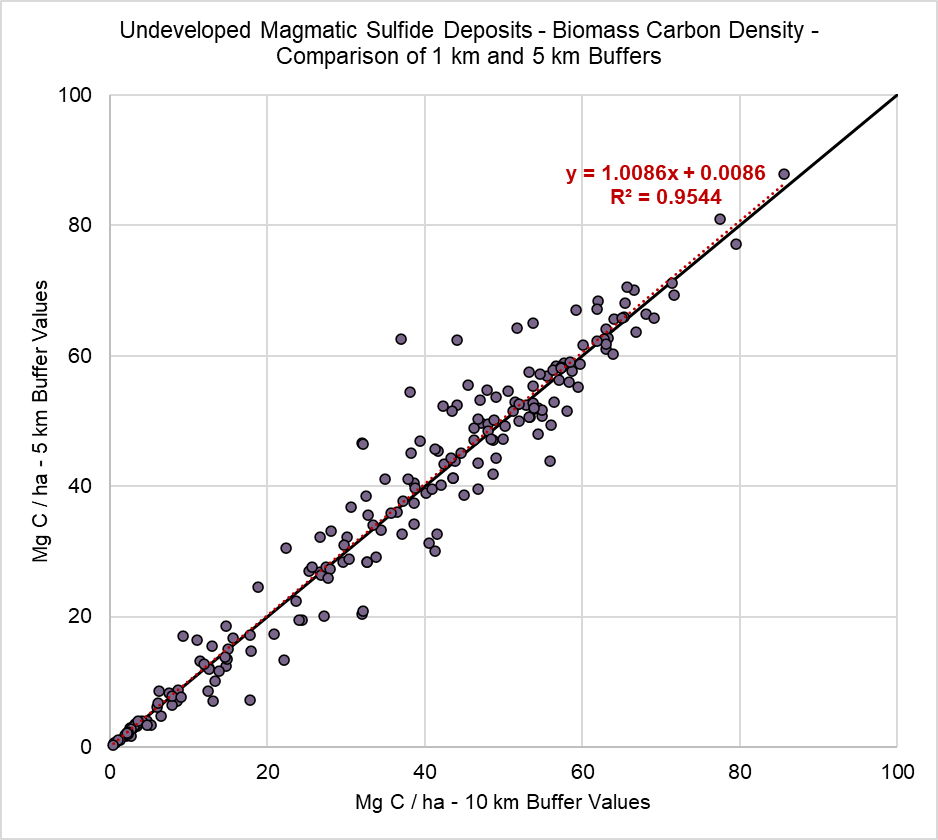


**B**

Fig. S4.

Sensitivity analysis comparing aboveground biomass carbon density calculations (including aboveground and belowground biomass) for 1 km and 5 km (A) and 5 km and 10 km (B) radius buffer circles for undeveloped magmatic sulfide deposits.

**
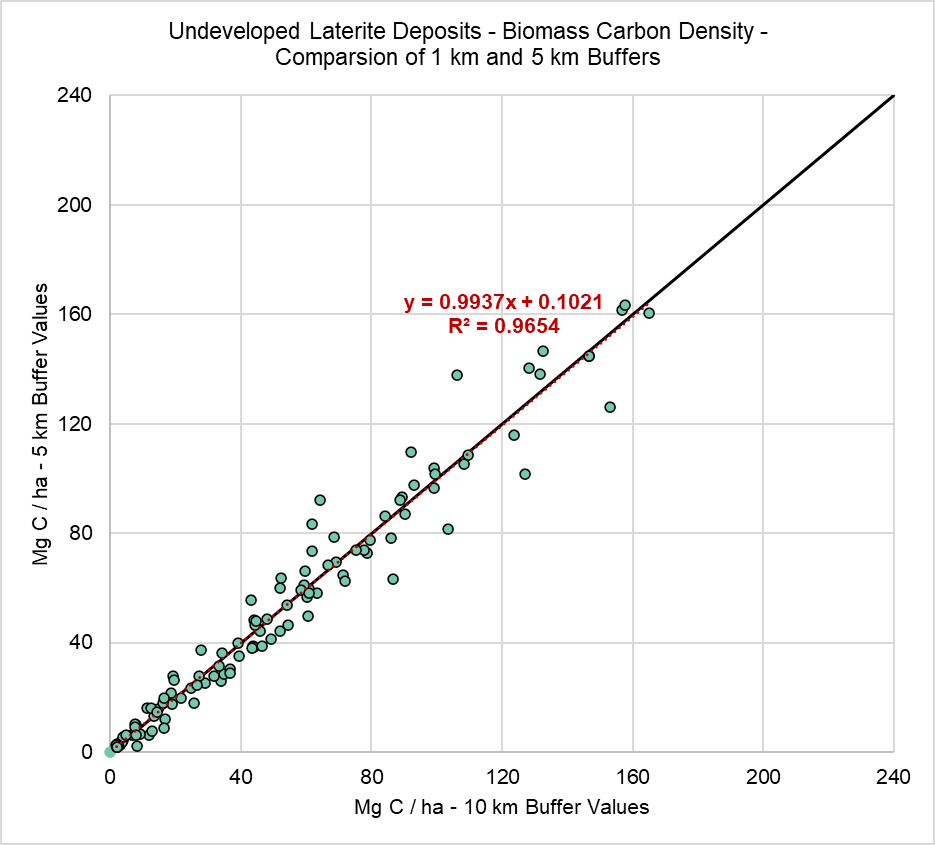
**

**A**

**
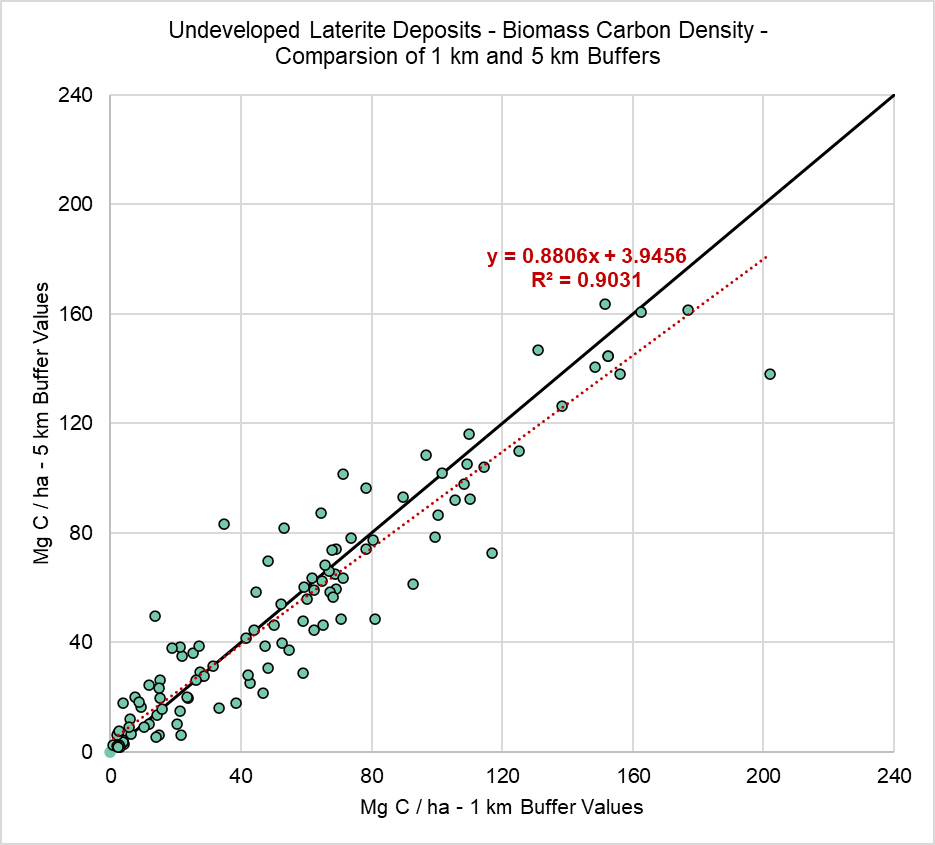
**

**B**

Fig. S5.

Sensitivity analysis comparing belowground biomass carbon density calculations (including aboveground and belowground biomass) for 1 km and 5 km (A) and 5 km and 10 km (B) radius buffer circles for undeveloped laterite deposits.
