# Supplementary material for: Biomass carbon emissions from nickel mining have significant implications for climate action
Source: Research Square preprint supplement (doi:10.21203/rs.3.rs-2469411/v1), 2023-02-01
Supplement: Supplementary file 2 [file 3b7e08edb353906a95c475f2.xlsx]

## Sheet: Sheet1
Project Name:	Primary Commodity:	Country:	Latitude (degrees):	Longitude (degrees):	Development Stage:	Deposit Size (Mt):	Deposit Type - S&P Text:	Deposit Type - This Study:	Data Sources for Deposit Type:
Polar Division	Nickel	Russia	69.28	88.16	Expansion	15.485	Flood Basalt (Dyke-Sill Complexes)	Magmatic Sulphide	S&P Database, Company Website: https://www.nornickel.com/business/assets/taimyr/
Clarion-Clipperton Zone	Nickel	Tonga	15	-130	Reserves Development	9.794	Accretionary Sea Floor Nodules	Seafloor	S&P Database, Scientific Article: Hein et al. (2020) Deep-ocean polymetallic nodules as a resource for critical metals. Nature Reviews Earth & Environment, 1(3), https://doi.org/10.1038/ s43017-020-0027-0
Weda Bay	Nickel	Indonesia	0.5	127.96	Operating	9.337	Laterite (Generic)	Laterite	S&P Database, Company Website: https://www.eramet.com/en/activities/development-projects/weda-bay-an-ambitious-nickel-production-project
Pomalaa	Nickel	Indonesia	-4.23	121.6	Operating	7.727	Laterite (Ni-Saprolite)	Laterite	S&P Database, Company Website: https://www.antam.com/en/products/nickel
Iisko-Tagulsk	Nickel	Russia	54.37	98.77	Reserves Development	7.5		Magmatic Sulphide	Scientific Article: Polyakov et al. (2013) Ultramafic-mafic igneous complexes of the Precambrian East Siberian metallogenic province (southern framing of the Siberian craton): age, composition, origin, and ore potential. Russian Geology and Geophysics, 54: 1319-1331.
Dumont	Nickel	Canada	48.64	-78.44	Feasibility Complete	5.7207	Komatiitic Magmatic	Magmatic Sulphide	S&P Database, Company Website: https://www.ausenco.com/en/dumont-nickel-project
Jinchuan	Nickel	China	38.49	102.14	Operating	5.502	Flood Basalt (Dyke-Sill Complexes)	Magmatic Sulphide	S&P Database, Scientific Article: Porter (2016) Regional tectonics, geology, magma chamber processes, and mineralisation of the Jinchuan nickel-copper-PGE deposit, Gansu Province, China: A review. Geoscience Frontiers, 7(3): 431-451.
Turnagain	Nickel	Canada	58.47	-128.86	Prefeas/Scoping	4.84435		Magmatic Sulphide	Company Website: https://gigametals.com/projects/project-overview/
Hanking Group	Nickel	Indonesia	-3.6	122	Operating	4.80189	Laterite (Generic)	Laterite	S&P Database, including "Comments" section
SLN	Ferronickel	New Caledonia	-21.41	165.68	Operating	4.582	Laterite (Ni-Co - Limonite), Laterite (Ni-Saprolite)	Laterite	S&P Database, Company Website: https://www.eramet.com/en/sln
Southern Samar	Nickel	Philippines	10.76	125.67	Target Outline	4.5		Laterite	Company Press Release: http://www.mbmiresources.com/s/NewsReleases.asp?ReportID=310956&_Title=Samar-Nickel-Properties-Agreement-Modified
Tapunopaka	Nickel	Indonesia	-3.46	122.28	Operating	4.441	Laterite (Generic)	Laterite	S&P Database, Company Press Release: https://www.antam.com/en/news-and-events/article/antam-begins-to-operate-tapunopaka-nickel-mine-in-southeast-sulawesi
Kalgoorlie	Nickel	Australia	-30.14	121.18	Feasibility Started	4.4255	Laterite (Generic)	Laterite	S&P Database, Company Website: https://ardearesources.com.au/projects-knp
Pinares de Mayari	Nickel	Cuba	20.56	-75.7	Feasibility	4.4	Laterite (Generic)	Laterite	S&P Database, Scientific Article: Lazarenkov et al. (2005) Platinum Group Metals and Gold in Supergene Nickel Ores of the Moa and Nikaro Deposits (Cuba). Lithology and Mineral Resources, 40(6): 521-527.
Punta Gorda	Nickel	Cuba	20.63	-74.88	Operating	4.093	Laterite (Generic)	Laterite	S&P Database, Scientific Article: de Oliveira et al. (2001) Ochreous laterite: a nickel ore from Punta Gorda, Cuba. Journal of South American Earth Sciences, 14(3): 307-317.
Honeymoon Well	Nickel	Australia	-26.92	120.37	Preproduction	4.007	Komatiitic Magmatic	Magmatic Sulphide	S&P Database, Scientific Article: Donaldson and Bromley (1981) The Honeymoon Well nickel sulfide deposits, Western Australia. Economic Geology, 76(4): 1550-1564.
Zebediela	Nickel	South Africa	-24.12	29.02	Prefeas/Scoping	3.96		Magmatic Sulphide	Company Website: http://www.urumetals.com/portfolio/projects/nickel
Gag Island	Nickel	Indonesia	-0.45	129.87	Feasibility Started	3.92	Laterite (Generic)	Laterite	S&P Database, Company Website: https://www.antam.com/en/products/nickel
Jacare	Nickel	Brazil	-6.16	-51.86	Reserves Development	3.913	Laterite (Generic)	Laterite	S&P Database, Scientific Article: Christopher et al. (2006) The Discovery and Exploration of the Jacarè (“Alligator”) Nickel Laterite-Saprolite Deposit, Pará State, Brazil, ASEG Extended Abstracts, 2006:1, 1-3, DOI: 10.1071/ASEG2006ab023.
Terrafame	Nickel	Finland	63.97	28.07	Operating	3.87992	Black Shale	Black Shale	S&P Database, Company Website: https://www.terrafame.com/terrafame-ltd.html
Nakety/Moneo	Nickel	New Caledonia	-21.52	166.09	Feasibility	3.855	Laterite (Ni-Co - Limonite), Laterite (Ni-Saprolite)	Laterite	S&P Database, including "Comments" section
Maturi	Copper	USA	47.78	-91.7	Prefeas/Scoping	3.834	Layered Mafic-Ultramafic Intrusion	Magmatic Sulphide	S&P Database, Company Website: https://www.twin-metals.com/why-minnesota/the-maturi-deposit/
Biankouma-Sipilou	Nickel	Cote d'Ivoire	7.86	-7.91	Reserves Development	3.81	Laterite (Generic)	Laterite	S&P Database, Scientific Article: Evans et al. (2016) An overview of nickel mineralisation in Africa with emphasis on the Mesoproterozoic East African Nickel Belt (EANB). Episodes, 39(2), DOI: 10.18814/epiiugs/2016/v39i2/95780.
Koniambo	Nickel	New Caledonia	-20.97	164.79	Expansion	3.34	Laterite (Generic)	Laterite	S&P Database, Company Website: http://www.koniambonickel.nc/?ln=En
San Felipe	Nickel	Cuba	21.54	-77.96	Reserves Development	3.25	Laterite (Generic)	Laterite	S&P Database, including "Comments" section
Nickel West	Nickel	Australia	-27.23	120.54	Operating	3.18	Komatiitic Magmatic	Magmatic Sulphide	S&P Database, Company Website: https://www.bhp.com/our-businesses/minerals-australia/nickel-west/
Decar	Nickel	Canada	54.89	-125.35	Prefeas/Scoping	3.11085	Podiform (Ophiolite-Peridotite)	Magmatic Sulphide	S&P Database, Company Website: https://fpxnickel.com/projects-overview/decar-nickel-iron-alloy-project/
Kola Division	Nickel	Russia	69.39	30.73	Operating	3.109		Magmatic Sulphide	Company Website: https://www.nornickel.com/business/assets/kola/
Bugotu	Nickel	Solomon Islands	-8.51	159.63	Reserves Development	3		Laterite	Scientific Article: Sagapoa et al. (2011) Laterization process of peridotite in Siruka, Choiseul, Solomon Islands. Journal of Southeast Asian Applied Geology, 3(2): 76-92.
Sichuan Jinguang	Nickel	Philippines	9.96	118.78	Reserves Development	3		Laterite	"Comments" section of the S&P Database
Surigao	Nickel	Philippines	9.64	118.38	Reserves Development	2.952	Laterite (Generic)	Laterite	S&P Database, including "Comments" section
Mindoro	Nickel	Philippines	13.05	121.13	Feasibility Complete	2.926	Laterite (Generic)	Laterite	S&P Database, including "Comments" section
Mesaba	Copper	USA	47.64	-91.89	Prefeas/Scoping	2.92	Layered Mafic-Ultramafic Intrusion	Magmatic Sulphide	S&P Database, Scientific Article: Fix (2015) Characterization of Weathering Products on Duluth Complex Rocks and Implications for Metal Mobility, Mesaba Deposit, Minnesota, USA. M.Sc. Thesis, University of Minnesota.
Musongati	Nickel	Burundi	-3.74	30.24	Reserves Development	2.886	Laterite (Generic)	Laterite	S&P Database, including "Comments" section
Project 81	Nickel	Canada	48.81	-81.21	Prefeas/Scoping	2.873	Diamond-Kimberlitic-Diatreme, Volcanogenic Massive Sulfide (VMS)	Magmatic Sulphide	S&P Database, Company Website: https://www.noblemineralexploration.com/projects/project-81/
Cerro Matoso	Nickel	Colombia	7.9	-75.55	Operating	2.714	Laterite (Generic)	Laterite	S&P Database, Company Website: https://www.south32.net/our-business/south-america/cerro-matoso
Pomalaa East	Nickel	Indonesia	-4.22	121.68	Feasibility	2.69		Laterite	"Comments" section of the S&P Database
Platreef	Platinum	South Africa	-24.09	28.98	Construction Started	2.66621	Layered Mafic-Ultramafic Intrusion	Magmatic Sulphide	S&P Database, Company Website: https://www.ivanhoemines.com/projects/platreef-project/
Goro	Nickel	New Caledonia	-22.29	166.96	Expansion	2.633	Laterite (Ni-Co - Limonite)	Laterite	S&P Database, Company Website: http://www.vale.nc/?p=1097&lang=en
La Sampala	Nickel	Indonesia	-2.7	121.92	Reserves Development	2.6244	Laterite (Generic)	Laterite	S&P Database, including "Comments" section
Yakabindie	Nickel	Australia	-27.45	120.57	Reserves Development	2.6014	Komatiitic Magmatic	Magmatic Sulphide	S&P Database, Scientific Article: Naldrett and Turner (1977) The geology and petrogenesis of a greenstone belt and related nickel sulfide mineralization at Yakabindie, Western Australia. Precambrian Research, 5(1): 43-103.
Pujada	Nickel	Philippines	6.76	126.15	Reserves Development	2.6		Laterite	Scientific Article: Fan and Gerson (2011) Nickel geochemistry of a Philippine laterite examined by bulk and microprobe synchrotron analyses. Geochimica et Cosmochimica Acta, 75(21): 6400-6415.
Araguaia	Nickel	Brazil	-7.99	-49.41	Construction Planned	2.56893	Laterite (Generic)	Laterite	S&P Database, Company Website: https://horizonteminerals.com/uk/en/araguaia_project/
Weld Range	Platinum	Australia	-26.8	117.74	Reserves Development	2.5055	Layered Mafic-Ultramafic Intrusion	Magmatic Sulphide	S&P Database, Company Website: https://podiumminerals.com/projects/overview/
Larco	Nickel	Greece	38.65	23.57	Operating	2.47638	Laterite (Generic)	Laterite	S&P Database, Company Website: http://www.larco.gr/nickel.php
Hengjaya	Nickel	Indonesia	-2.94	122.23	Expansion	2.405	Laterite (Ni-Co - Limonite), Laterite (Ni-Saprolite)	Laterite	S&P Database, including "Comments" section
Kingash	Nickel	Russia	54.89	95.46	Prefeas/Scoping	2.36936	Komatiitic Magmatic	Magmatic Sulphide	S&P Database, Scientific Article: Radomskaya et al. (2017) Geochemistry and mineralogy of platinum group elements in ores of the Kingash deposit, Eastern Sayan, Russia. Geology of Ore Deposits, 59: 354-374.
Murrin Murrin	Nickel	Australia	-28.76	121.89	Expansion	2.36	Laterite (Ni-Co - Limonite)	Laterite	S&P Database, Company Website: https://www.minara.com.au/who-we-are/murrin-murrin
Ambatovy	Nickel	Madagascar	-18.86	48.3	Operating	2.28109	Laterite (Generic), Laterite (Ni-Saprolite)	Laterite	S&P Database, Company Website: https://ambatovy.com/ang/
Mount Margaret	Nickel	Australia	-28.31	120.98	Prefeas/Scoping	2.1014	Laterite (Generic)	Laterite	S&P Database, including "Comments" section
PT Yiwan	Nickel	Indonesia	-3.19	116	Operating	2.036		Laterite	"Comments" section of the S&P Database
Tavai	Nickel	Malaysia	5.58	117.33	Reserves Development	2.025		Laterite	"Comments" section of the S&P Database
Central Musgrave	Nickel	Australia	-26.05	128.95	Feasibility Complete	1.95346	Laterite (Generic)	Laterite	S&P Database, Company Website: https://www.metalsx.com.au/nickel-regional-exploration/
Ravensthorpe	Nickel	Australia	-33.64	120.39	Operating	1.9432	Laterite (Ni-Co - Limonite), Laterite (Ni-Saprolite)	Laterite	S&P Database, Company Website: https://www.first-quantum.com/English/our-operations/default.aspx
Sudbury Operations	Nickel	Canada	46.63	-81.36	Expansion	1.94	Astrobleme	Magmatic Sulphide	S&P Database, Company Website: https://www.glencore.ca/en/sudburyino/
Maba	Nickel	Indonesia	0.7	128.26	Reserves Development	1.938	Laterite (Generic)	Laterite	S&P Database, including "Comments" section
Moa Bay	Nickel	Cuba	20.6	-74.93	Operating	1.8649	Laterite (Ni-Co - Limonite), Laterite (Ni-Saprolite)	Laterite	S&P Database, Company Website: https://www.sherritt.com/English/operations/metals/Moa/default.aspx
Sorowako	Nickel	Indonesia	-2.56	121.37	Operating	1.864	Laterite (Ni-Saprolite)	Laterite	S&P Database, Company Website: http://www.vale.com/indonesia/en/business/mining/nickel/nickel-indonesia/pages/default.aspx
Onca Puma	Nickel	Brazil	-6.57	-51.09	Operating	1.734	Laterite (Generic)	Laterite	S&P Database, including "Comments" section
Nonoc	Nickel	Philippines	9.83	125.61	Feasibility	1.584	Laterite (Generic)	Laterite	S&P Database, including "Comments" section
Vermelho	Nickel	Brazil	-6.48	-49.89	Prefeas/Scoping	1.555	Laterite (Generic)	Laterite	S&P Database, Company Website: https://horizonteminerals.com/uk/en/vermelho_project/
Mayaniquel	Nickel	Guatemala	15.44	-89.64	Prefeas/Scoping	1.54119	Laterite (Generic)	Laterite	S&P Database, Company Website: https://www.mnsaguatemala.com/
Mambare	Nickel	Papua New Guinea	-8.78	147.74	Reserves Development	1.53	Laterite (Generic), Laterite (Ni-Saprolite)	Laterite	S&P Database, Company Website: https://www.corcelplc.com/projects/mambare/
Kabanga	Nickel	Tanzania	-2.88	30.54	Feasibility Complete	1.526	Flood Basalt (Dyke-Sill Complexes)	Magmatic Sulphide	S&P Database, Company Website: https://www.kabanganickel.com/en/the-project.html
Bokoni	Platinum	South Africa	-24.29	29.89	Expansion	1.5109	Layered Mafic-Ultramafic Intrusion	Magmatic Sulphide	S&P Database, including "Comments" section
Figesbal	Nickel	New Caledonia	-21.52	166.1	Operating	1.5	Laterite (Generic)	Laterite	S&P Database, including "Comments" section
Santa Fe/Ipora	Nickel	Brazil	-15.72	-51.14	Prefeas/Scoping	1.481	Laterite (Generic)	Laterite	S&P Database, Company Press Release: https://www.invmetals.com/news/international-nickel-ventures-corporation-santa-feipora-nickel-joint-venture-advances-stage-2-work-program-of-38300-meters-with-8-drill-rigs/
Taganito	Nickel	Philippines	9.53	125.81	Operating	1.423	Laterite (Ni-Co - Limonite), Laterite (Ni-Saprolite)	Laterite	S&P Database, including "Comments" section
Las Camariocas/Cupey	Nickel	Cuba	20.61	-74.83	Feasibility	1.412	Laterite (Generic)	Laterite	S&P Database, including "Comments" section
Ramu	Nickel	Papua New Guinea	-5.57	145.19	Operating	1.41	Laterite (Generic)	Laterite	S&P Database, Company Website: https://www.nickel28.com/our-assets/ramu-nickel-cobalt-operation/
Avalon	Nickel	Australia	-30.69	121.82	Reserves Development	1.403	Laterite (Ni-Co - Limonite)	Laterite	S&P Database, including "Comments" section
Barro Alto	Nickel	Brazil	-15.1	-49.04	Operating	1.3656	Laterite (Generic), Laterite (Ni-Saprolite)	Laterite	S&P Database, Company Website: https://www.angloamerican.com/about-us/our-stories/mine-profile-barro-alto
Carman Bay	Nickel	Canada	48.37	-81.01	Exploration	1.34		Magmatic Sulphide	Company Website: http://www.starfireminerals.ca/Index.aspx?page=Carman
Wowo Gap	Nickel	Papua New Guinea	-9.54	148.91	Feasibility Started	1.325	Laterite (Generic), Laterite (Ni-Saprolite)	Laterite	S&P Database, Company Website: https://resmin.com.au/wowo-gap-nickel-project/
Eramen Zambales	Nickel	Philippines	15.79	120	Reserves Development	1.307		Laterite	Company Website: https://eramenminerals.com/
Montes Claros	Nickel	Brazil	-16	-51.39	Preproduction	1.289	Laterite (Generic)	Laterite	S&P Database, Scientific Article: Foggiatto et al. (2010). Beneficiation of nickel lateritic ore from Montes Claros de Goias, Brazil. XXV International Mineral Processing Congress - IMPC 2010, Brisbane, Australia, 6-9 September 2010. Carlton, VIC, Australia: AusIMM: Australasian Institute of Mining and Metallurgy.
Zambales	Nickel	Philippines	15.71	120.05	Reserves Development	1.231	Laterite (Generic)	Laterite	S&P Database, including "Comments" section
Cawse	Nickel	Australia	-30.37	121.14	Feasibility	1.2193	Laterite (Ni-Co - Limonite)	Laterite	S&P Database, including "Comments" section
Kun-Manie	Nickel	Russia	55.35	132.41	Feasibility Started	1.21508		Magmatic Sulphide	Company Website: https://amurminerals.com/kun-manie-project-background/
Ronnbacken	Nickel	Sweden	65.5	15.38	Prefeas/Scoping	1.206		Magmatic Sulphide	Company Press Release: https://www.sgu.se/globalassets/om-sgu/anvandarrad/prospekteringsrad/prospekteringsrad-april-2015-bilaga-3.pdf
West Musgrave	Nickel	Australia	-26.08	127.78	Prefeas/Scoping	1.19	Layered Mafic-Ultramafic Intrusion	Magmatic Sulphide	S&P Database, Company Website: https://www.ozminerals.com/operations/west-musgrave/
Nickel Shaw	Nickel	Canada	61.46	-139.53	Prefeas/Scoping	1.168	Layered Mafic-Ultramafic Intrusion	Magmatic Sulphide	S&P Database, Company Website: https://www.nickelcreekplatinum.com/Home/default.aspx
Sheba's Ridge	Platinum	South Africa	-25.32	29.38	Feasibility Complete	1.15		Magmatic Sulphide	Company Press Release: https://www.angloamericanplatinum.com/media/press-releases/archive/2003/14-02-2003
Falcondo	Nickel	Dominican Republic	18.9	-70.31	Operating	1.12	Laterite (Generic)	Laterite	S&P Database, including "Comments" section
Zimplats	Platinum	Zimbabwe	-18.6	30.3	Expansion	1.0998	Layered Mafic-Ultramafic Intrusion	Magmatic Sulphide	S&P Database, Company Website: https://www.zimplats.com/
Isabela	Nickel	Philippines	16.6	122.3	Reserves Development	1.073	Laterite (Ni-Co - Limonite), Laterite (Ni-Saprolite)	Laterite	S&P Database, including "Comments" section
Yerilla	Nickel	Australia	-29.71	122.06	Feasibility	1.0312	Laterite (Generic)	Laterite	S&P Database, Company Press Release: https://ardearesources.com.au/downloads/prelist/hrr2017010602.pdf
Norwest	Nickel	Brazil	-13.75	-60.34	Target Outline	1.02914	Laterite (Generic)	Laterite	S&P Database, including "Comments" section
MMS	U3O8	Sweden	63.01	14.38	Prefeas/Scoping	1.02602		Black Shale	Note: Same as Viken Deposit below. Scientific Article: Lippmaa et al. (2011) Resources, production, and processing of Baltoscandian multimetal black shales. Oil Shale, 28(1): 68-77.
Viken	Vanadium	Sweden	63.02	14.37	Advanced Exploration			Black Shale	Note: Same as MMS Deposit above. Scientific Article: Lippmaa et al. (2011) Resources, production, and processing of Baltoscandian multimetal black shales. Oil Shale, 28(1): 68-77.
Dutwa	Nickel	Tanzania	-2.49	33.85	Feasibility	0.983	Laterite (Generic)	Laterite	S&P Database, Company Press Release: https://www.harmony-minerals.com/wp-content/uploads/2019/04/Worley-Parsons_A-Dutwa-Ni-Review_0218.pdf
Clean TeQ Sunrise	Nickel	Australia	-32.76	147.42	Construction Planned	0.935	Laterite (Ni-Co - Limonite)	Laterite	S&P Database, Company Website: https://www.cleanteq.com/sunrise-project/
Lubalisi	Nickel	Tanzania	-5.9	30.09	Reserves Development	0.92		Laterite	Company Website: https://www.riftenergymetals.com/
Souker	Nickel	Russia	69.42	30.52	Feasibility	0.8942		Magmatic Sulphide	Scientific Article: Barnes et al. (2001) The composition and mode of formation of the Pechenga nickel deposits, Kola Peninsula, Northwestern Russia. The Canadian Mineralogist, 39(2): 447-471.
Niwest	Nickel	Australia	-28.67	121.71	Prefeas/Scoping	0.878	Laterite (Generic)	Laterite	S&P Database, Company Website: https://gmeresources.com.au/projects/niwestproject/
Cendrawana	Nickel	Indonesia	-2.52	138.88	Target Outline	0.834		Laterite	"Comments" section of the S&P Database
Morro Sem Bone	Nickel	Brazil	-13.19	-60.29	Reserves Development	0.827	Laterite (Generic)	Laterite	S&P Database, including "Comments" section
Shevchenko	Nickel	Kazakhstan	51.93	60.87	Feasibility	0.825	Laterite (Generic)	Laterite	S&P Database, including "Comments" section
Rio Tuba	Nickel	Philippines	8.59	117.46	Operating	0.811491	Laterite (Ni-Co - Limonite), Laterite (Ni-Saprolite)	Laterite	S&P Database, Company Website: https://nickelasia.com/subsidiaries/rio-tuba-nickel-mining-corporation
Ontario Division	Nickel	Canada	46.49	-81.06	Operating	0.8026	Astrobleme	Magmatic Sulphide	S&P Database, including "Comments" section
Tagaung Taung	Nickel	Myanmar	23.63	96.16	Operating	0.8	Laterite (Generic)	Laterite	S&P Database, Scientific Article: Schellman (1989) Composition and origin of lateritic nickel ore at Tagaung Taung, Burma. Mineralium Deposita, 24: 161-168.
Voronezh	Nickel	Russia	51.12	41.41	Reserves Development	0.7995		Magmatic Sulphide	Scientific Article: Chernyshov and Pereslavtsev (1994) The role of accumulation in forming the nickeliferous norite-diorite intrusions of the Voronezh crystalline massif. International Geology Review, 36: 587-604.
Agata	Nickel	Philippines	9.28	125.52	Expansion	0.796083	Laterite (Generic), Laterite (Ni-Saprolite)	Laterite	S&P Database, Company Website: https://tvird.com.ph/agata-nickel/
NorthMet	Copper	USA	47.61	-91.97	Construction Planned	0.78925	Layered Mafic-Ultramafic Intrusion	Magmatic Sulphide	S&P Database, Company Website: https://polymetmining.com/operations/northmet-snapshot/
Cameroon East	Cobalt	Cameroon	3.33	13.83	Feasibility	0.784221	Laterite (Generic)	Laterite	S&P Database, including "Comments" section
Nkomati	Nickel	South Africa	-25.74	30.62	Limited Production	0.77822	Layered Mafic-Ultramafic Intrusion	Magmatic Sulphide	S&P Database, Company Website: https://www.nornickel.com/business/assets/south-africa/
SCONI	Cobalt	Australia	-19.01	144.93	Construction Planned	0.735979	Laterite (Generic)	Laterite	S&P Database, Company Website: https://australianmines.com.au/
Piaui	Nickel	Brazil	-8.46	-41.96	Limited Production	0.723	Laterite (Generic)	Laterite	S&P Database, Company Website: https://www.braziliannickel.com/piaui-nickel-project/
Acoje	Nickel	Philippines	15.71	120.05	Limited Production	0.72012	Laterite (Generic)	Laterite	S&P Database, Company Website: https://www.dmciholdings.com/our_businesses/page/mining-coal-and-nickel
Maslovskoe	Nickel	Russia	69.23	88.07	Prefeas/Scoping	0.7121		Magmatic Sulphide	Scientific Article: Krivolutskaya et al. (2012) Mineralogy, geochemistry, and stratigrapy of the Maslovsky Pt-Cu-Ni suldife depisit, Noril'sk Region, Russia.: Implications for relationship of ore-bearing intrusions and lava. Mineralium Deposita, 47: 69-88.
Toronto	Nickel	Philippines	9.22	118.25	Satellite	0.696	Laterite (Generic)	Laterite	S&P Database, including "Comments" section
Kevitsa	Nickel	Finland	67.7	27	Expansion	0.695		Magmatic Sulphide	Scientific Article: La Vaillant et al. (2016) Effects of hydrous alteration on the distribution of base metals and platinum group elements within the Kevitsa magmatic nickel sulphide deposit. Ore Geology Reviews, 27: 128-148.
Nicaro	Nickel	Cuba	20.6	-75.53	Operating	0.684	Laterite (Generic)	Laterite	S&P Database, Scientific Article: Lewis et al. (2006) Ophiolite-Related Ultramafic Rocks (Serpentinities) in the Caribbean Region: An Overview of their Occurrence, Composition, Origin, Emplacement, and Ni-Laterite Soil Formation. Geologica Acta, 4(1-2): 237-263.
Siduarsi	Nickel	Indonesia	-2.52	138.88	Target Outline	0.679	Laterite (Generic)	Laterite	S&P Database, including "Comments" section
Haggan	Vanadium	Sweden	63.03	14.28	Prefeas/Scoping	0.6778	Shale Hosted	Black Shale	S&P Database, including "Comments" section
Cagdianao	Nickel	Philippines	9.48	125.85	Operating	0.6778	Laterite (Ni-Co - Limonite), Laterite (Ni-Saprolite)	Laterite	S&P Database, including "Comments" section
Fenix	Nickel	Guatemala	15.52	-89.39	Operating	0.673	Laterite (Generic), Laterite (Ni-Saprolite)	Laterite	S&P Database, Company Website: https://solwaygroup.com/our-business/fenix-project-guatemala/
Celestial	Nickel	Philippines	8.91	117.89	Feasibility Complete	0.6492	Laterite (Generic)	Laterite	S&P Database, including "Comments" section
Gladstone	Nickel	Australia	-23.06	149.89	Feasibility	0.647	Laterite (Generic)	Laterite	S&P Database, including "Comments" section
Subayin	Nickel	Indonesia	0.73	127.56	Reserves Development	0.638	Laterite (Generic)	Laterite	S&P Database, including "Comments" section
Eucalyptus	Nickel	Australia	-29.08	122.18	Reserves Development	0.633		Laterite	"Comments" section of the S&P Database
Carrascal-Cantilan	Nickel	Philippines	9.28	125.88	Operating	0.628354	Laterite (Ni-Co - Limonite), Laterite (Ni-Saprolite)	Laterite	S&P Database, Company Website: https://www.marcventuresholdings.com/about_mmdc
Chaya	Nickel	Russia	56.31	110.36	Reserves Development	0.626		Magmatic Sulphide	"Comments" section of the S&P Database
Cosmos	Nickel	Australia	-27.6	120.57	Construction Started	0.619174	Komatiitic Magmatic	Magmatic Sulphide	S&P Database, Company Website: https://www.westernareas.com.au/what-we-do/cosmos
Voisey's Bay	Nickel	Canada	56.33	-62.09	Expansion	0.61		Magmatic Sulphide	Scientific Article: Li and Naldrett (1999) Geology and petrology of Voisey's Bay intrusion: reaction of olivine with sulfide and silicate liquids. Lithos, 47(1-2): 1-31.
Weiye	Nickel	Indonesia	-7.1	107.64	Operating	0.6		Laterite	"Comments" section of the S&P Database
Sta. Cruz	Nickel	Philippines	15.77	119.99	Operating	0.597835	Laterite (Generic)	Laterite	S&P Database, including "Comments" section
Young	Nickel	Australia	-34.17	148.05	Prefeas/Scoping	0.589	Laterite (Generic)	Laterite	S&P Database, including "Comments" section
Wiluna	Cobalt	Australia	-26.5	120.15	Reserves Development	0.585	Laterite (Generic)	Laterite	S&P Database, Company Website: https://acap.com.au/nickel-cobalt/
Sentani	Nickel	Indonesia	-2.58	140.53	Target Outline	0.58	Laterite (Generic)	Laterite	S&P Database, Scientific Article: Thirnbeck (2001) The Sentani and Siduarsi Nickel-Cobalt Laterite Deposits, Northeast Irian Jaya, Indonesia. Conference Abstract, PNG Geology, Exploration, and Mining Conference, Port Moresby, 22-24 June 2001.
Bulanjao	Nickel	Philippines	8.56	117.42	Reserves Development	0.58		Laterite	"Comments" section of the S&P Database
Gogota	Nickel	Guinea	7.75	-8.49	Reserves Development	0.57304	Laterite (Generic)	Laterite	S&P Database, including "Comments" section
Kalia	Iron Ore	Guinea	10.15	-10.94	Feasibility Complete	0.54409	Banded Iron Formation (BIF)	Laterite	S&P Database, including "Comments" section
Waterberg	Palladium	South Africa	-23.37	28.9	Feasibility Complete	0.5421		Magmatic Sulphide	Company Website: https://www.platinumgroupmetals.net/waterberg/default.aspx
Yuzhuralnickel	Nickel	Russia	50.82	60.97	Closed	0.542	Laterite (Generic)	Laterite	S&P Database, including "Comments" section
Jaguar	Nickel	Brazil	-6.49	-51.19	Prefeas/Scoping	0.5175		Magmatic Sulphide	Compay Website: https://www.centaurus.com.au/site/content/
Eagle's Nest	Nickel	Canada	52.74	-86.3	Feasibility Complete	0.487		Magmatic Sulphide	Company Website: https://norontresources.com/projects/eagles-nest-mine/
Cyclops	Nickel	Indonesia	-2.46	140.36	Target Outline	0.485	Laterite (Ni-Co - Limonite)	Laterite	S&P Database, Company Website: https://www.boltmetals.com/project-cyclops
Manicani	Nickel	Philippines	10.99	125.64	Reserves Development	0.472	Laterite (Generic)	Laterite	S&P Database, including "Comments" section
Birch Lake	Copper	USA	47.74	-91.8	Prefeas/Scoping	0.471	Layered Mafic-Ultramafic Intrusion	Magmatic Sulphide	S&P Database, including "Comments" section
Julia Creek	Vanadium	Australia	-20.7	141.93	Reserves Development	0.469	Shale Hosted	Black Shale	S&P Database, Company Website: https://www.qldem.com.au/project/
Trident - Sentinel	Copper	Zambia	-12.23	25.14	Operating	0.4526	Sediment Hosted (Reduced Facies)	Sediment Hosted	S&P Database, Company Website: https://www.first-quantum.com/English/our-operations/default.aspx
Bahodopi	Nickel	Indonesia	-2.71	121.95	Feasibility Started	0.451	Laterite (Generic), Laterite (Ni-Saprolite)	Laterite	S&P Database, including "Comments" section
Cagdianao	Nickel	Philippines	10.16	125.66	Operating	0.441	Laterite (Ni-Co - Limonite), Laterite (Ni-Saprolite)	Laterite	S&P Database, including "Comments" section
Xiari Hamu	Nickel	China	36.49	93.36	Reserves Development	0.44		Magmatic Sulphide	Scientific Article: Li et al. (2015) Geochronology, petrology, and Hf-S isotope geochemistry of the newly-discovered Xiarihamu magmatic Ni-Cu sulfide deposit in the Qinghai-Tibet plateau, western China. Lithos, 216-217:224-240.
Devolli	Nickel	Albania	40.61	21.02	Reserves Development	0.432	Laterite (Generic)	Laterite	S&P Database, Company Website: https://www.ronly.com/our-services/devolli-nickel-laterite-project/
Brooke's Point	Nickel	Philippines	8.96	117.82	Reserves Development	0.428	Laterite (Generic), Laterite (Ni-Saprolite)	Laterite	S&P Database, including "Comments" section
Yuanjiang	Nickel	China	23.51	101.75	Operating	0.427	Laterite (Generic)	Laterite	S&P Database, Scientific Article: Fu et al. (2019) Weathering of Ophiolite Remnant and Formation of Ni Laterite in Strong Uplifted Tectonic Region (Yuanjiang, Southwest China). Minerals, 9(1), 51: https://doi.org/10.3390/min9010051
Sakatti	Copper	Finland	67.54	26.75	Reserves Development	0.424		Magmatic Sulphide	Scientific Article: Moilanen et al. (2021) Re-Os isotope geochemistry of the Palaeoproterozoic Sakatti Cu-Ni-PGE sulphide deposit in northern Finland. Ore Geology Reviews, 132: 104044, Company Website: https://finland.angloamerican.com/en/about-sakatti
Morro do Engenho	Nickel	Brazil	-15.53	-51.67	Reserves Development	0.421	Laterite (Generic)	Laterite	S&P Database, Scientific Article: de Oliveira et al. (1992) Lateritic nickel deposits of Brazil. Mineralium Deposita, 27: 137-146.
Lesego	Platinum	South Africa	-24.38	29.74	Feasibility	0.420925		Magmatic Sulphide	Company Website: https://www.lesego.com/
Impala	Platinum	South Africa	-25.51	27.23	Expansion	0.4123	Layered Mafic-Ultramafic Intrusion	Magmatic Sulphide	S&P Database, Company Website: https://www.implats.co.za/
Tocantins	Nickel	Brazil	-14.41	-48.43	Operating	0.39	Laterite (Generic)	Laterite	S&P Database, Scientific Article: de Oliveira et al. (1992) Lateritic nickel deposits of Brazil. Mineralium Deposita, 27: 137-146.
Hami	Nickel	China	42.53	94.24	Operating	0.382		Magmatic Sulphide	"Comments" section of the S&P Database
Caldag	Nickel	Turkey	38.9	27.73	Feasibility Complete	0.375	Laterite (Generic)	Laterite	S&P Database, Scientific Article: Thorne et al. (2009) Composition on origin of the Çaldağ nickel laterite, W. Turkey. Mineralium Deposita, 44(5): 581-595.
Victoria	Nickel	Canada	46.41	-81.38	Construction Planned	0.366423		Magmatic Sulphide	Company Website: https://kghm.com/en/our-business/projects-under-development/victoria
Richmond	Vanadium	Australia	-20.21	141.72	Feasibility Started	0.36		Black Shale	Company Website: https://horizonminerals.com.au/richmond-vanadium-jv/
Minago	Nickel	Canada	54.11	-99.16	Operating	0.359		Magmatic Sulphide	Company Website: http://www.victorynickel.ca/projects/minago/
Ntaka Hill	Nickel	Tanzania	-10.1	38.54	Prefeas/Scoping	0.35638		Magmatic Sulphide	Scientific Article: Barnes et al. (2019) Nickel-Copper Sulfide Mineralization in the Ntaka Hill Ultramafic Complex, Nachingwea Region, Tanzania. Economic Geology, 114(6): 1135-1158.
East Yellow Mountain	Nickel	China	42.26	94.6	Expansion	0.350288		Magmatic Sulphide	"Comments" section of the S&P Database
Nunavik	Nickel	Canada	61.42	-74.13	Limited Production	0.3502		Magmatic Sulphide	Scientific Article: Rogge et al. (2014) Mapping of Ni-Cu-PGE ore hosting ultramafic rocks using airborne and simulated EnMAP hyperspectral imagery, Nunavik, Canada. Remote Sensing of Environment, 152: 302-317.
Ta Khoa	Nickel	Vietnam	21.19	104.32	Operating	0.3419	Layered Mafic-Ultramafic Intrusion	Magmatic Sulphide	S&P Database, Scientific Article: Wang et al. (2018) A synthesis of magmatic Ni-Cu-(PGE) sulfide deposits in the ~260 Ma Emeishan large igneous province, SW China and northern Vietnam. Journal of Asian Earth Sciences, 154: 162-186.
Kokogllave	Nickel	Albania	40.63	21	Reserves Development	0.322	Laterite (Generic)	Laterite	S&P Database, including "Comments" section
Selkirk	Nickel	Botswana	-21.31	27.72	Feasibility	0.3152		Magmatic Sulphide	Scientific Article: Maier et al. (2008) The composition of magmatic Ni-Cu-(PGE) sulfide deposits in the Tati and Selebi-Phikwe belts of eastern Botswana. Mineralium Deposita, 43: 37-60.
Chernogorskoye	Platinum	Russia	69.03	88.7	Reserves Development	0.3146		Magmatic Sulphide	Company Website: https://russian-platinum.ru/about/company?setlang=2
Ulugan	Nickel	Philippines	10.05	118.76	Target Outline	0.313	Laterite (Generic)	Laterite	S&P Database, including "Comments" section
Ferguson Lake	Nickel	Canada	62.87	-96.83	Prefeas/Scoping	0.303		Magmatic Sulphide	Scientific Article: Acosta-Góngora et al. (2018) The Ferguson Lake deposit: an example of Ni-Cu-Co-PGE mineralization emplaced in a back-arc setting? Canadian Journal of Earth Sciences, 55(8), https://doi.org/10.1139/cjes-2017-0185
Forrestania	Nickel	Australia	-32.58	119.74	Expansion	0.300588		Magmatic Sulphide	Company Website: https://www.westernareas.com.au/what-we-do/forrestania
Sukinda Valley	Nickel	India	21.02	85.75	Feasibility	0.3	Laterite (Generic)	Laterite	S&P Database, including "Comments" section
Gordes	Nickel	Turkey	39.03	28.26	Expansion	0.3	Laterite (Generic)	Laterite	S&P Database, Scientific Article: Eliopoulos et al. (2012) Geochemical features of nickel-laterite deposits from the Balkan Peninsula and Gordes, Turkey: The genetic and environmental significance of arsenic. Ore Geology Reviews, 48: 413-427.
Kulymbinskaya	Nickel	Russia	68.08	89.11	Reserves Development	0.297		Magmatic Sulphide	"Comments" section of the S&P Database
Jianchaling	Nickel	China	33.25	106.37	Reserves Development	0.282		Magmatic Sulphide	Scientific Article: Jiang and Zhu (2017) Geology and geochemistry of the Jianchaling hydrothermal nickel deposit: T–pH–fO2–fS2 conditions and nickel precipitation mechanism. Ore Geology Reviews, 91: 216-235.
Two Rivers	Platinum	South Africa	-24.95	30.1	Expansion	0.2741	Layered Mafic-Ultramafic Intrusion	Magmatic Sulphide	S&P Database, Company Website: https://arm.co.za/arm-platinum/
Zambales	Nickel	Philippines	15.77	120.05	Reserves Development	0.27	Laterite (Generic)	Laterite	S&P Database, Company Website: https://eramenminerals.com/
Kureisko-Gorbiachinskaya	Nickel	Russia	67.44	88.43	Reserves Development	0.27		Magmatic Sulphide	"Comments" section of the S&P database
Avebury	Nickel	Australia	-41.91	145.25	Closed	0.2594		Magmatic Sulphide	Scientific Article: Keays and Jowitt (2013) The Avebury Ni deposit, Tasmania: A case study of an unconventional nickel deposit. Ore Geology Reviews, 52: 4-17.
Vuruchuaivench	Platinum	Russia	67.88	32.95	Feasibility	0.2482	Layered Mafic-Ultramafic Intrusion	Magmatic Sulphide	S&P Database, including "Comments" section
Victor Deep	Nickel	Canada	46.67	-80.81	Reserves Development	0.244	Astrobleme	Magmatic Sulphide	S&P Database, including "Comments" section
Phoenix	Nickel	Botswana	-21.21	27.77	Operating	0.2415		Magmatic Sulphide	Scientific Article: Maier et al. (2008) The composition of magmatic Ni-Cu-(PGE) sulfide deposits in the Tati and Selebi-Phikwe belts of eastern Botswana. Mineralium Deposita, 43: 37-60.
Jilin	Nickel	China	42.9	126.42	Operating	0.24		Magmatic Sulphide	"Comments" section of the S&P Database
Mhondoro	Platinum	Zimbabwe	-18.33	30.33	Closed	0.237		Magmatic Sulphide	"Comments" section of the S&P Database
Gornostai	Nickel	Kazakhstan	50.56	78.81	Reserves Development	0.235	Laterite (Generic)	Laterite	S&P Database, Company Website: http://www.fincraftresources.kz/activity/kaznickel_llp?language=en
Nova-Bollinger	Nickel	Australia	-31.81	123.17	Operating	0.234	Layered Mafic-Ultramafic Intrusion	Magmatic Sulphide	S&P Database, Scientific Article: Barnes et al. (2020) Sulfide Emplacement and Migration in the Nova-Bollinger Ni-Cu-Co Deposit, Albany-Fraser Orogen, Western Australia. Economic Geology, 115(8): 1749-1776.
SBH Black Shale	Uranium	Canada	57.68	-111.9	Prefeas/Scoping	0.233798		Black Shale	"Comments" section of the S&P Database
Hinatuan	Nickel	Philippines	9.77	125.71	Operating	0.228	Laterite (Ni-Co - Limonite), Laterite (Ni-Saprolite)	Laterite	S&P Database, Company Website: https://nickelasia.com/subsidiaries/hinatuan-mining-corporation
Sudbury Operations	Copper	Canada	46.63	-81.39	Operating	0.227302		Magmatic Sulphide	Company Website: https://www.glencore.ca/en/sudburyino/
Marlborough	Nickel	Australia	-22.94	149.83	Target Outline	0.22		Laterite	Scientific Article: Foster and Eggleton (2002) The Marlborough Nickel Laterite Deposits. In: Roach, I.C. (ed) Regolith and Landscapes in Eastern Australia, pp. 33-36, CRC LEME.
Zanzui	Nickel	Tanzania	-2.93	33.82	Reserves Development	0.21951		Laterite	Company Press Release: https://www.tanzaniainvest.com/mining/new-tanzania-mineral-deposits-at-zanzui-complex
Suyeke North	Nickel	China	45.15	83.52	Reserves Development	0.2167		Magmatic Sulphide	"Comments" section of the S&P Database
Savannah	Nickel	Australia	-17.35	128.02	Operating	0.2098	Layered Mafic-Ultramafic Intrusion	Magmatic Sulphide	S&P Database, Scientific Article: Le Vaillant et al. (2020) Multidisciplinary study of a complex magmatic system: The Savannah Ni-Cu-Co Camp, Western Australia. Ore Geology Reviews, 117, 103292.
Canegrass	Nickel	Australia	-30.28	120.97	Prefeas/Scoping	0.209	Laterite (Generic)	Laterite	S&P Database, Company Website: https://huntsmanx.com/projects/canegrass-project/
Gasquet Mountain	Nickel	USA	41.84	-124.01	Feasibility Complete	0.208605	Laterite (Generic)	Laterite	S&P Database, including "Comments" section
Kulikovskoye	Nickel	Russia	53.66	60	Preproduction	0.204		Laterite	Scientific Article: Selivanov and Sergeeva (2019) Prospects for the Ferronickel Production Development from the Urals Oxidized Nickel Ores. KnE Materials Science, 5(1), 77–91, https://doi.org/10.18502/kms.v5i1.3954.
Venus	Nickel	Australia	-27.78	120.69	Reserves Development	0.203366		Magmatic Sulphide	Company Website: https://www.bhp.com/our-businesses/minerals-australia/nickel-west/
Skroska	Nickel	Albania	41.09	20.5	Reserves Development	0.201177	Laterite (Generic)	Laterite	S&P Database, including "Comments" section
Hunters Road	Nickel	Zimbabwe	-19.15	29.77	Reserves Development	0.200404	Komatiitic Magmatic	Magmatic Sulphide	S&P Database, Scientific Article: Prendergast (2005) Komatiite hosted Hunters Road nickel deposit, central Zimbabwe: physical volcanology and sulfide genesis. Australian Journal of Earth Sciences, 48(5): 681-694.
Suhanko Arctic Platinum	Platinum	Finland	66.26	26.28	Prefeas/Scoping	0.198673	Layered Mafic-Ultramafic Intrusion	Magmatic Sulphide	S&P Database, Company Website: https://www.suhanko.com/
Black Swan	Nickel	Australia	-30.39	121.64	Feasibility Complete	0.19503		Magmatic Sulphide	Company Website: https://poseidon-nickel.com.au/black-swan/
Santa Rita	Nickel	Brazil	-14.18	-39.71	Operating	0.1931		Magmatic Sulphide	Company Website: https://atlanticnickel.com/uk/
Irwin-Coglia	Nickel	Australia	-29.14	123.05	Reserves Development	0.192	Laterite (Generic)	Laterite	S&P Database, including "Comments" section
Black Hill	Nickel	Australia	-30.92	121.85	Reserves Development	0.192	Laterite (Generic)	Laterite	S&P Database, including "Comments" section
Valozoro	Nickel	Madagascar	-20.83	47.24	Reserves Development	0.191	Laterite (Generic)	Laterite	S&P Database, Company Press Release: https://www.diamondfields.com/valozoro-nickel-update/
Buena Vista	Nickel	Guatemala	14.99	-90.94	Exploration	0.18	Laterite (Generic)	Laterite	S&P Database, including "Comments" section
Jericho	Nickel	Australia	-27.05	120.44	Reserves Development	0.18		Magmatic Sulphide	Scientific Article: Fiorentini et al. (2007) Controls on the genesis and emplacement of komatiite-hosted Ni-Cu-PGE sulphides at Albion Downs (Agnew-Wiluna Belt, Western Australia): a case study on the development of PGE lithogeochemical vectors to Ni-Cu-PGE sulphide deposits. Applied Earth Science, 116: 152-166.
Girilambone	Copper	Australia	-31.51	147.05	Reserves Development	0.17945	Volcanogenic Massive Sulfide (VMS)	Magmatic Sulphide	S&P Database, Company Website: https://www.aerisresources.com.au/operations/tritton-copper-operations/
Ferronikeli	Nickel	Serbia	42.63	20.91	Operating	0.178	Laterite (Generic)	Laterite	S&P Database, Company Website: http://www.ferronikeli.com/
Libjo	Nickel	Philippines	10.17	125.51	Reserves Development	0.172		Laterite	Company Website: https://nickelasia.com/assets/documents/Annual-Report-2011.pdf
Quicksilver	Nickel	Australia	-32.77	118.67	Reserves Development	0.1685	Laterite (Ni-Saprolite)	Laterite	S&P Database, Company Website: https://www.goldenmileresources.com.au/projects/
Kalatongke	Nickel	China	46.75	89.66	Expansion	0.168226		Magmatic Sulphide	Scientific Article: Li et al. (2011) The Kalatongke magmatic Ni-Cu deposits in the Central Asian Orogenic Belt, NW China: Product of slab window magmatism? Mineralium Deposita, 47(1): 51-67.
Loma de Niquel	Nickel	Venezuela	10.15	-67.11	Operating	0.16624	Laterite (Generic)	Laterite	S&P Database, including "Comments" section
Nickel King	Nickel	Canada	60.24	-104.51	Reserves Development	0.163463		Magmatic Sulphide	Company Website: https://www.cornishmetals.com/projects/north-america-1/nickel-king/
Homeville	Nickel	Australia	-32.01	147.04	Prefeas/Scoping	0.162	Laterite (Generic)	Laterite	S&P Database, including "Comments" section
Mphahlele's Location	Platinum	South Africa	-24.32	29.6	Feasibility	0.16		Magmatic Sulphide	Company Website: https://www.sedibeloplatinum.com/
Bucko Lake	Nickel	Canada	54.87	-98.65	Operating	0.155201	Komatiitic Magmatic	Magmatic Sulphide	S&P Database, Company Website: http://www.canickel.com/s/home.asp
Mimosa	Platinum	Zimbabwe	-20.32	29.82	Operating	0.1546	Layered Mafic-Ultramafic Intrusion	Magmatic Sulphide	S&P Database, Company Website: https://www.sibanyestillwater.com/business/southern-africa/pgm-operations/mimosa/
Tamarack	Nickel	USA	46.67	-93.12	Prefeas/Scoping	0.154	Layered Mafic-Ultramafic Intrusion	Magmatic Sulphide	S&P Database, Company Website: https://talonmetals.com/
Mwetaung	Nickel	Myanmar	23.41	94.01	Reserves Development	0.15	Laterite (Generic)	Laterite	S&P Database, including "Comments" section
Windarra	Nickel	Australia	-28.61	122.24	Construction Planned	0.1485		Magmatic Sulphide	Company Website: https://poseidon-nickel.com.au/mt-windarra/
Tjate	Platinum	South Africa	-24.5	29.98	Feasibility Started	0.14804		Magmatic Sulphide	Company Website: https://jubileemetalsgroup.com/tjate-platinum-project/
Kepha	Nickel	Philippines	9.43	125.75	Reserves Development	0.148	Laterite (Generic)	Laterite	S&P Database, including "Comments" section
Mt Edwards	Nickel	Australia	-31.68	121.61	Reserves Development	0.146881		Magmatic Sulphide	Company Website: https://www.neometals.com.au/our-projects/long-term-projects/mt-edwards-project/
Pulot	Nickel	Philippines	9.07	117.96	Satellite	0.145	Laterite (Generic)	Laterite	S&P Database, including "Comments" section
Barnes Hill	Nickel	Australia	-41.21	146.77	Prefeas/Scoping	0.144378	Laterite (Generic)	Laterite	S&P Database, Company Website: https://nqminerals.com/barnes-hill/
Eagle	Nickel	USA	46.74	-87.88	Operating	0.1443	Flood Basalt (Dyke-Sill Complexes)	Magmatic Sulphide	S&P Database, Company Website: https://www.lundinmining.com/operations/eagle/
Vila Oito	Nickel	Brazil	-7.87	-49.34	Feasibility Complete	0.141	Laterite (Generic)	Laterite	S&P Database, including "Comments" section
Mt Thirsty	Cobalt	Australia	-32.1	121.64	Prefeas/Scoping	0.1391	Laterite (Generic)	Laterite	S&P Databse, Company Website: https://www.barraresources.com.au/mt-thirsty
Berong	Nickel	Philippines	9.4	118.23	Operating	0.13702	Laterite (Generic)	Laterite	S&P Database, including "Comments" section
Pine Flat	Nickel	USA	41.99	-123.99	Feasibility	0.136	Laterite (Generic)	Laterite	S&P Database, including "Comments" section
Heishan	Copper	China	41.81	97.03	Reserves Development	0.135		Magmatic Sulphide	Scientific Article: Xie et al. (2014) Geochemistry Insights on the Genesis of the Subduction-Related Heishan Magmatic Ni-Cu-(PGE) Deposit, Gansu, Northwestern China, at the Southern Margin of the Central Asian Orogenic Belt. Economic Geology, 109(6): 1563-1583.
Pardoo-Highway	Nickel	Australia	-20.18	119.65	Reserves Development	0.1341	Layered Mafic-Ultramafic Intrusion	Magmatic Sulphide	S&P Database, Company Website: https://www.caeneus.com.au/pilbara-projects/pardoo-project.html
Codemin	Nickel	Brazil	-14.15	-48.33	Operating	0.134	Laterite (Ni-Saprolite)	Laterite	S&P Database, Company Website: https://www.angloamerican.com/products/nickel-and-manganese?product=nickel
Summervale	Nickel	Australia	-31.43	147.03	Reserves Development	0.133		Laterite	"Comments" section of the S&P Database
Leinster Tailings	Nickel	Australia	-27.76	120.75	Prefeas/Scoping	0.1322		Tailings	"Comments" section of the S&P Database
Stillwater Complex	Platinum	USA	45.38	-109.86	Reserves Development	0.129	Layered Mafic-Ultramafic Intrusion	Magmatic Sulphide	S&P Database, Company Website: https://www.sibanyestillwater.com/
Marula	Platinum	South Africa	-24.51	30.1	Operating	0.1269	Layered Mafic-Ultramafic Intrusion	Magmatic Sulphide	S&P Database, Company Website: https://www.implats.co.za/
Norseman	Cobalt	Australia	-32.09	121.64	Prefeas/Scoping	0.1225	Komatiitic Magmatic, Laterite (Generic), Volcanogenic Massive Sulfide (VMS)	Magmatic Sulphide	S&P Database, Company Website: http://www.galileomining.com.au/projects/norseman-project-2/
Grasvally	Chromite	South Africa	-24.32	28.97	Feasibility Started	0.1194	Layered Mafic-Ultramafic Intrusion	Magmatic Sulphide	S&P Database, including "Comments" section
Samapleu	Nickel	Cote d'Ivoire	7.71	-7.91	Prefeas/Scoping	0.119		Magmatic Sulphide	Company Website: https://samaresources.com/samapleu-property-pr123/
Aurora	Platinum	South Africa	-23.57	28.91	Reserves Development	0.119	Layered Mafic-Ultramafic Intrusion	Magmatic Sulphide	S&P Database, Scientific Article: McFall et al. (2019) The mineralogy and mineral associations of platinum-group elements and precious metals in the Aurora Cu-Ni-Au-PGE deposit, Northern Limb, Bushveld Complex. Ore Geology Reviews, 106: 403-422.
Duck Hill	Nickel	Australia	-29.51	122.27	Reserves Development	0.118	Laterite (Generic)	Laterite	S&P Database, including "Comments" section
Lynn Lake	Nickel	Canada	56.84	-101	Prefeas/Scoping	0.1168	Layered Mafic-Ultramafic Intrusion, Volcanogenic Massive Sulfide (VMS)	Magmatic Sulphide	S&P Database, Company Website: http://www.victorynickel.ca/projects/lynn_lake/
Romblon	Nickel	Philippines	12.35	122.56	Reserves Development	0.111433	Laterite (Generic)	Laterite	S&P Database, including "Comments" section
Grey Dam	Nickel	Australia	-30.47	122.15	Reserves Development	0.11	Komatiitic Magmatic, Laterite (Ni-Co - Limonite)	Magmatic Sulphide	S&P Database, Company Website: https://carnavaleresources.com/lambouka-oil-gas/
Baie N'go	Nickel	New Caledonia	-22.29	166.71	Target Outline	0.107		Laterite	"Comments" section of the S&P Database
Makwa Mayville	Nickel	Canada	50.62	-95.6	Prefeas/Scoping	0.104		Magmatic Sulphide	Company Website: https://www.gridmetalscorp.com/properties/makwa-mayville-nickel-copper-copper-pge/
Pyke Hill	Nickel	Australia	-29.04	122.15	Reserves Development	0.1033	Laterite (Generic)	Laterite	S&P Database, Company Website: https://ady.com.au/projects/pyke-hill-western-australia/
Trojan	Nickel	Zimbabwe	-17.32	31.28	Operating	0.103102	Komatiitic Magmatic	Magmatic Sulphide	S&P Database, Scientific Article: Markwitz et al. (2010) Magmatic nickel sulfide mineralization in Zimbabwe: Review of deposits and development of exploration criteria for prospectivity analysis. Ore Geology Reviews, 38(3): 139-155.
South Kambalda	Nickel	Australia	-31.7	121.62	Operating	0.1017		Magmatic Sulphide	Company Website: https://www.mincor.com.au/site/content/
Szklary	Nickel	Poland	50.63	16.83	Reserves Development	0.1008	Laterite (Generic)	Laterite	S&P Database, Scientific Article: Kaczan et al. (2021) Szklary nickel deposit - a review and introduction to attempts at hydrometallurgical processing. Mineral Economics, 34: 315-322.
Casiguran	Nickel	Philippines	10.43	125.62	Operating	0.1		Laterite	"Comments" section of the S&P Database
Sherlock Bay	Nickel	Australia	-20.81	117.54	Feasibility Started	0.0992		Magmatic Sulphide	Company Website: https://www.sabresources.com/view.php?id=36
Pingan	Nickel	China	36.44	101.75	Operating	0.098		Laterite	"Comments" section of the S&P Database
Rooderand	Platinum	South Africa	-25.33	26.91	Feasibility	0.098		Magmatic Sulphide	"Comments" section of the S&P Database
Lanfranchi	Nickel	Australia	-31.5	121.83	Operating	0.0955		Magmatic Sulphide	S&P Database, Company Website: https://www.blackmountainmetals.com/operations/
Cumpie Hill	Nickel	Dominican Republic	18.88	-70.28	Reserves Development	0.0927	Laterite (Generic)	Laterite	S&P Database, including "Comments" section
Isabel	Nickel	Solomon Islands	-8.44	159.71	Operating	0.0912	Laterite (Generic)	Laterite	S&P Database, including "Comments" section
Libjo	Nickel	Philippines	10.19	125.58	Reserves Development	0.09		Laterite	"Comments" section of the S&P Database
Kivijarvi	Nickel	Russia	62.35	31	Reserves Development	0.088		Magmatic Sulphide	Scientific Article: Suslova et al. (1981) Nickeliferous Ultramafic-Mafic Volcanic-Intrusive Complexes of the Karelia-Kola and North Siberian Regions. International Geology Review, 23: 1135-1147.
Golden Valley	Nickel	South Africa	-26	27.51	Reserves Development	0.088		Magmatic Sulphide	"Comments" section of the S&P Database
Duketon	Nickel	Australia	-27.62	122.01	Prefeas/Scoping	0.087115		Magmatic Sulphide	Company Website: https://duketonmining.com.au/
Pilanesberg	Platinum	South Africa	-25.1	26.99	Operating	0.087	Layered Mafic-Ultramafic Intrusion	Magmatic Sulphide	S&P Database, Company Website: https://ppmsa.co.za/
Thierry	Copper	Canada	51.49	-90.34	Prefeas/Scoping	0.086		Magmatic Sulphide	Company Website: https://braveheartresources.com/projects/thierry-mine/
Lake Lovno	Nickel	Russia	67.85	30.56	Reserves Development	0.085		Magmatic Sulphide	Scientific Article: Orsoev et al. (2016) Mineral CuFe2S4 from Sulfide Copper–Nickel Ores of the Lovnoozero Deposit, Kola Peninsula. Geology of Ore Deposits, 58(7): 579-585.
Lovnozersky	Nickel	Russia	68.34	30.05	Reserves Development	0.0849		Magmatic Sulphide	Scientific Article: Orsoev et al. (2016) Mineral CuFe2S4 from Sulfide Copper–Nickel Ores of the Lovnoozero Deposit, Kola Peninsula. Geology of Ore Deposits, 58(7): 579-585.
Selebi-Phikwe	Nickel	Botswana	-21.94	27.85	Operating	0.084		Magmatic Sulphide	Scientific Article: Maier et al. (2008) The composition of magmatic Ni-Cu-(PGE) sulfide deposits in the Tati and Selebi-Phikwe belts of eastern Botswana. Mineralium Deposita, 43: 37-60.
Taganaan	Nickel	Philippines	9.77	125.71	Operating	0.083	Laterite (Generic)	Laterite	S&P Database, Company Website: https://nickelasia.com/subsidiaries/hinatuan-mining-corporation
Eerste Regt	Platinum	South Africa	-24.4	29.76	Reserves Development	0.082		Magmatic Sulphide	Company Website: https://www.lesego.com/
Lappvattnet	Nickel	Sweden	64.5	20.83	Reserves Development	0.080331		Magmatic Sulphide	Company Website: https://www.gungnirresources.com/projects/lappvattnet-rormyrberget/overview/
Fisher East	Nickel	Australia	-26.8	121.55	Prefeas/Scoping	0.078	Komatiitic Magmatic	Magmatic Sulphide	S&P Database, Company Website: https://www.roxresources.com.au/projects/fisher-east-nickel-wa/
Serra Azul Saprolite	Nickel	Brazil	-14.19	-39.72	Reserves Development	0.075	Laterite (Generic)	Laterite	S&P Database, including "Comments" section
Huangshan Nan	Nickel	China	42.9	93.5	Commissioning	0.073918		Magmatic Sulphide	Scientific Article: Ge et al. (2020) Aeromagnetic identification and modeling of mafic-ultramafic complexes in the Huangshan-Turaergen Ni-Cu metallogenic belt in NW China: Magmatic and metallogenic implications. Ore Geology Reviews, 127, 103849.
Haito	Nickel	Togo	7.23	0.9	Reserves Development	0.07128	Laterite (Generic)	Laterite	S&P Database, including "Comments" section
Karikvavr-2	Nickel	Russia	69.27	31.47	Feasibility	0.069		Magmatic Sulphide	Scientific Article: Neradovskii et al. (1982) Native bismuth and other minerals in the Karik'yavr copper- nickel ore deposit (Kola Peninsula). Zapiski Vsesoyuznogo Mineralogicheskogo Obshchestva,111: 552-556
Shangani	Nickel	Zimbabwe	-19.68	29.22	Operating	0.06787	Komatiitic Magmatic	Magmatic Sulphide	S&P Database, Scientific Article: Markwitz et al. (2010) Magmatic nickel sulfide mineralization in Zimbabwe: Review of deposits and development of exploration criteria for prospectivity analysis. Ore Geology Reviews, 38(3): 139-155.
Rautavaara	Nickel	Finland	63.5	28.31	Reserves Development	0.065		Black Shale	"Comments" section of the S&P Database
Yunnan Henghao	Nickel	China	22.84	102.98	Operating	0.063		Magmatic Sulphide	"Comments" section of the S&P Database
Shakespeare	Nickel	Canada	46.33	-81.85	Target Outline	0.061008		Magmatic Sulphide	Company Website: https://magnamining.com/portfolio_page/shakespeare/
Munali	Nickel	Zambia	-15.92	28.13	Operating	0.059825		Magmatic Sulphide	Scientific Article: Holwell et al. (2017) The Munali Ni sulfide deposit, southern Zambia: A multi-stage, mafic-ultramafic, magmatic sulphide-magnetite-apatite-carbonate megabreccia. Ore Geology Reviews, 90: 553-575.
Browns	Copper	Australia	-12.99	130.99	Reserves Development	0.059556		Unconformity Type Uranium Associated	Scientific Article: McCready et al. (2004) Polymetallic Mineralization at the Browns Deposit, Rum Jungle Mineral Field, Northern Territory, Australia. Economic Geology, 99: 257-277.
War Springs	Platinum	South Africa	-24.22	29.04	Reserves Development	0.059		Magmatic Sulphide	"Comments" section of the S&P Database
Mokopane	Platinum	South Africa	-24.14	29.01	Reserves Development	0.058		Magmatic Sulphide	"Comments" section of the S&P Database
Boikgantsho	Platinum	South Africa	-23.9	28.86	Prefeas/Scoping	0.0572		Magmatic Sulphide	"Comments" section of the S&P Database
Coronation Dam	Cobalt	Australia	-29.52	122.27	Reserves Development	0.0567	Laterite (Ni-Co - Limonite), Laterite (Ni-Saprolite)	Laterite	S&P Database, Company Website: https://wcminerals.com.au/coronation-dam/
Lac des Iles	Palladium	Canada	49.16	-89.61	Operating	0.0559	Layered Mafic-Ultramafic Intrusion	Magmatic Sulphide	S&P Database, Company Website: https://www.nap.com/operations/default.aspx
Grasset	Nickel	Canada	49.96	-78.33	Reserves Development	0.054983		Magmatic Sulphide	Company Website: https://wallbridgemining.com/our-projects/detour-gold-trend/grasset/
Madison	Cobalt	USA	37.54	-90.27	Reserves Development	0.053	Carb-Hosted (Mississippi Valley Type)	Mississippi Valley Type	S&P Database, Company Website: https://www.mocobalt.com/
Jinbaoshan	Platinum	China	25	100.76	Operating	0.053		Magmatic Sulphide	Scientific Article: Wang et al. (2008) Platinum-group minerals from the Jinbaoshan Pd-Pt deposit, SW China: evidence for magmatic origin and hydrothermal alteration. Mineralium Deposita, 43: 791-803.
Kenbridge	Nickel	Canada	49.48	-93.63	Prefeas/Scoping	0.052889		Magmatic Sulphide	Company Website: https://tartisannickel.com/portfolio_page/kenbridge/
Radio Hill	Nickel	Australia	-20.98	116.86	Feasibility	0.052045	Layered Mafic-Ultramafic Intrusion	Magmatic Sulphide	S&P Database, Company Website: https://artemisresources.com.au/project/radio-hill/
Lake Johnston	Nickel	Australia	-32.19	120.48	Commissioning	0.052	Komatiitic Magmatic	Magmatic Sulphide	S&P Database, Company Website: https://poseidon-nickel.com.au/lake-johnston/
Lantinen Koillismaa	Palladium	Finland	65.94	28.17	Reserves Development	0.0515	Layered Mafic-Ultramafic Intrusion	Magmatic Sulphide	S&P Database, Company Website: https://www.palladiumoneinc.com/projects/palladium/lantinen-koillismaa-project-finland
Bowden Lake	Nickel	Canada	54.91	-98.66	Reserves Development	0.050194	Komatiitic Magmatic	Magmatic Sulphide	S&P Database, Company Website: http://www.canickel.com/s/BowdenLake.asp
Stone Corral	Nickel	USA	41.93	-124.01	Reserves Development	0.05	Laterite (Generic)	Laterite	S&P Database, including "Comments" section
Leeuwkap	Platinum	South Africa	-25.62	27.6	Feasibility	0.05	Layered Mafic-Ultramafic Intrusion	Magmatic Sulphide	S&P Database, including "Comments" section
Lavoie Lake	Nickel	Canada	52.47	-87.58	Target Outline	0.049		Magmatic Sulphide	"Comments" section of the S&P Database, Canadian Government Database: http://www.geologyontario.mndm.gov.on.ca/mndmfiles/MDI/data/records/MDI000000000787.html
Lansdowne House	Platinum	Canada	52.5	-87.51	Reserves Development	0.049	Layered Mafic-Ultramafic Intrusion	Magmatic Sulphide	S&P Database, including "Comments" section
Shengligou	Nickel	China	31.31	101.7	Reserves Development	0.049		Magmatic Sulphide	"Comments" section of the S&P Database
Thunder Bay North	Platinum	Canada	48.8	-88.96	Prefeas/Scoping	0.048144		Magmatic Sulphide	Company Website: https://www.cleanairmetals.ca/projects/thunder-bay-north/
Ufaleynickel	Nickel	Russia	56.04	60.26	Closed	0.048	Laterite (Generic)	Laterite	S&P Database, including "Comments" section
Blezard	Nickel	Canada	46.57	-80.97	Reserves Development	0.048		Magmatic Sulphide	"Comments" section of the S&P Database
Tarnavatskoye	Nickel	Ukraine	50.14	31.77	Feasibility	0.047		Laterite	"Comments" section of the S&P Database
Longchangren	Nickel	China	42.76	129.19	Feasibility	0.047		Magmatic Sulphide	"Comments" section of the S&P Database
Bon Accord	Nickel	South Africa	-25.76	31.1	Reserves Development	0.0469		Magmatic Sulphide	Scientific Article: O'Driscoll et al. (2014) Trevorite: Ni-rich spinel formed by metasomatism and desulfurization processes at Bon Accord, South Africa? Mineralogical Magazine ,78(1): 145 - 163, DOI: https://doi.org/10.1180/minmag.2014.078.1.11
Langmuir	Nickel	Canada	48.33	-81.03	Reserves Development	0.0466		Magmatic Sulphide	Company Website: https://www.rogueresources.ca/langmuir-project
Mel	Nickel	Canada	55.96	-97.8	Reserves Development	0.046266		sheng	Company Website: http://www.victorynickel.ca/projects/mel/
Pardee	Nickel	Canada	48.07	-89.62	Reserves Development	0.046		Magmatic Sulphide	"Comments" section of the S&P Database
West Graham	Nickel	Canada	46.43	-81.3	Reserves Development	0.046		Magmatic Sulphide	"Comments" section of the S&P Database
Toomey Hill	Nickel	Australia	-28.8	121.88	Reserves Development	0.046		Laterite	"Comments" section of the S&P Database
Kuhmo	Nickel	Finland	65.14	29.07	Reserves Development	0.045732		Magmatic Sulphide	"Comments" section of the S&P Database
Yakobi Island	Copper	USA	57.97	-136.42	Closed	0.0455	Volcanogenic Massive Sulfide (VMS)	Magmatic Sulphide	Scientific Article: Kennedy and Walton (1946) The geology and nickel-copper deposits of Yakobi Island, southeastern Alaska. U.S. Geological Survey Open File Report 44-85.
Long Complex	Nickel	Australia	-31.18	121.68	Operating	0.045	Komatiitic Magmatic	Magmatic Sulphide	S&P Database, including "Comments" section
Raglan	Nickel	Canada	61.39	-74.97	Reserves Development	0.044		Magmatic Sulphide	Company Website: https://www.glencore.ca/en/raglan/
East Lake	Nickel	Canada	61.68	-73.92	Reserves Development	0.043		Magmatic Sulphide	"Comments" section of the S&P Database
Baishiquan	Nickel	China	42.14	95.37	Operating	0.043		Magmatic Sulphide	Scientific Article: Chai et al. (2008) Geology, petrology, and geochemistry of the Baishiquan Ni-Cu-bearing mafic-ultramafic intrusions and Xinjiang, NW China: Implications for tectonics and genesis of ores. Journal of Asian Earth Sciences, 34(2-4): 218-235.
Hawk Ridge	Nickel	Canada	59	-69.64	Reserves Development	0.042295	Flood Basalt (Dyke-Sill Complexes)	Magmatic Sulphide	S&P Database, Company Website: https://www.nickelnorthexploration.com/s/hawk-ridge_ReportID_657626.html
Larkin's Find	Nickel	Australia	-29.46	122.25	Reserves Development	0.042	Laterite (Generic)	Laterite	S&P Database, including "Comments" section
Waite Kauri	Nickel	Australia	-28.66	121.71	Reserves Development	0.041	Laterite (Generic)	Laterite	S&P Database, including "Comments" section
Owendale	Scandium	Australia	-32.69	147.47	Feasibility Complete	0.040722	Laterite (Generic)	Laterite	S&P Database, Company Website: https://platinaresources.com.au/projects-platina-scandium/
North Kambalda	Nickel	Australia	-31.17	121.69	Construction Started	0.0405		Magmatic Sulphide	"Comments" section of the S&P Database, Company Website: https://www.mincor.com.au/site/projects/overview
Jacomynspan	Nickel	South Africa	-29.41	21.82	Reserves Development	0.03948	Volcanogenic Massive Sulfide (VMS)	Magmatic Sulphide	S&P Database, Company Website: https://www.orionminerals.com.au/projects/south-africa/namaqua-disawell-project/
Knox	Nickel	USA	44.17	-69.27	Closed	0.039		Magmatic Sulphide	Scientific Article: Cornwall (1966) Nickel Deposits of North America. U.S. Geological Survey Bulletin 1223.
Panton	Platinum	Australia	-17.79	127.81	Feasibility Complete	0.038563	Layered Mafic-Ultramafic Intrusion	Magmatic Sulphide	S&P Database, Company Website: https://www.elementalroyalties.com/royalties-and-streams/panton-sill/
Nama	Cobalt	Zambia	-12.26	27.61	Reserves Development	0.0379	Sediment Hosted (Reduced Facies)	Sediment Hosted	S&P Database, including "Comments" section
Baiyin Huzuo	Nickel	China	44.49	117.58	Reserves Development	0.037093		Unknown	Unable to find information on this deposit
Horden Lake	Copper	Canada	50.94	-77.79	Reserves Development	0.037		Magmatic Sulphide	Company Press Release: https://www.prnewswire.com/news-releases/el-condor-acquiring-advanced-exploration-stage-copper-nickel--pge-project-in-quebec-125003604.html
Botolan	Nickel	Philippines	15.31	120.08	Reserves Development	0.037	Laterite (Generic)	Laterite	S&P Database, including "Comments" section
Aguablanca	Nickel	Spain	37.96	-6.18	Closed	0.0362		Magmatic Sulphide	Scientific Article: Tornos et al. (2006) The Aguablanca Ni-(Cu) sulfide deposit, SW Spain: geologic and geochemical controls and the relationship with a midcrustal layered mafic complex. Mineralium Deposita, 41: 737-769.
Alpha	Nickel	Philippines	9.2	118.22	Reserves Development	0.0356	Laterite (Generic), Laterite (Ni-Saprolite)	Laterite	S&P Database, including "Comments" section
McBride	Nickel	Canada	44.87	-77.72	Target Outline	0.035561		Magmatic Sulphide	Company Press Release: https://panconresources.com/news/pancontinental-acquires-advanced-nickel-cobalt-copper-project-in-southern-ontario-with-two-defined-deposits/
Montcalm	Nickel	Canada	48.66	-82.09	Closed	0.035		Magmatic Sulphide	"Comments" section of the S&P Database
Epoch	Nickel	Zimbabwe	-20.43	29.27	Closed	0.035		Magmatic Sulphide	Scientific Article: Pirajno and González-Álvarez (2013)
Boa	Nickel	Philippines	10.11	125.65	Reserves Development	0.0347		Laterite	Company Website: https://nickelasia.com/assets/documents/Annual-Report-2011.pdf
Rooipoort	Gold	South Africa	-24.32	28.97	Reserves Development	0.034		Magmatic Sulphide	"Comments" section of S&P Database, Company Website: https://www.caledoniamining.com/wp-content/uploads/2019/02/CALPres051209.pdf
Krestovskoye	Nickel	Russia	56.02	60.25	Reserves Development	0.034		Laterite	"Comments" section of the S&P Database. Located in the Urals, a well-known laterite mining region.
Espedalen	Nickel	Norway	61.42	9.56	Reserves Development	0.0335		Magmatic Sulphide	Company Website: https://www.emxroyalty.com/asset-portfolio/norway/espedalen/
Old Nick	Nickel	Canada	49.04	-119.08	Reserves Development	0.033		Magmatic Sulphide	Canadian Government Database: https://minfile.gov.bc.ca/summary.aspx?minfilno=082ESW055
Bruvann	Nickel	Norway	68.23	16.91	Reserves Development	0.033		Magmatic Sulphide	Scientific Article: Boyd and Mathiesen (1979) The Nickel Mineralization of the Rana Mafic Intrusion, Norland, Norway. Canadian Mineralogist, 17: 287-298.
Santai	Nickel	China	24.43	98.58	Reserves Development	0.032		Unknown	Unable to find information on this deposit
Inkosi	Platinum	South Africa	-25.66	27.68	Advanced Exploration	0.032		Magmatic Sulphide	"Comments" section of the S&P Database
Junior Lake	Nickel	Canada	50.38	-87.94	Prefeas/Scoping	0.031809	Flood Basalt (Dyke-Sill Complexes), Komatiitic Magmatic, Mesothermal Lode Gold	Magmatic Sulphide	S&P Database, Company Website: https://www.landore.com/junior.php
Golden Ridge	Nickel	Australia	-30.91	121.71	Advanced Exploration	0.03101		Magmatic Sulphide	"Comments" section of the S&P Database, Company Website: https://www.essmetals.com.au/nickel-jv
Americano do Brasil	Nickel	Brazil	-16.1	-50.07	Operating	0.031		Magmatic Sulphide	Scientific Article: e Silva et al. (2011) Geology, petrology, and geochemistry of the "Americano do Brasil" layered intrusion, central Brazil, and its Ni-Cu sulfide deposits. Mineralium Deposita, 46: 57-90.
Monchetundra	Platinum	Russia	67.91	32.72	Feasibility Started	0.03041		Magmatic Sulphide	Company Website: https://www.eurasiamining.co.uk/operations/monchetundra
River Valley	Palladium	Canada	46.7	-80.27	Prefeas/Scoping	0.030277	Layered Mafic-Ultramafic Intrusion	Magmatic Sulphide	S&P Database, Company Website: https://newagemetals.com/river-valley-palladium-project/
Nisk	Nickel	Canada	51.7	-75.6	Reserves Development	0.03003	Layered Mafic-Ultramafic Intrusion	Magmatic Sulphide	S&P Database, including "Comments" section
Nemeiben Lake	Nickel	Canada	55.39	-105.36	Reserves Development	0.03		Magmatic Sulphide	Scientific Article: Macfarlane and Mossman (1981) The opaque minerals and economic geology of the Nemeiban Ultramafic Complex, Saskatchewan, Canada. Mineralium Deposita, 16: 409-424.
Texmont	Nickel	Canada	48.16	-81.2	Target Outline	0.029		Magmatic Sulphide	Scientific Article: Naldrett et al. (1972) Godlevskite (β-Ni7S6) from the Texmont Mine, Ontario. The Canadian Mineralogist, 11: 879-885.
Dikoloti	Nickel	Botswana	-22.1	27.73	Prefeas/Scoping	0.0287		Magmatic Sulphide	"Comments" section of the S&P Database
H-989	Nickel	China	42.18	94.54	Advanced Exploration	0.02864		Magmatic Sulphide	Company Website: http://www.huili.hk/en/bus.php
Huili	Nickel	China	26.46	102.04	Operating	0.028		Magmatic Sulphide	"Comments" section of the S&P Database
Hart	Nickel	Canada	48.3	-81.08	Prefeas/Scoping	0.0261	Komatiitic Magmatic	Magmatic Sulphide	S&P Database, Company Website: http://northernsunmining.ca/Projects/Hart-Project/default.aspx
Gulinskoye	Nickel	Russia	52.65	60.39	Reserves Development	0.026		Laterite	"Comments" section of the S&P Database
Hitura	Nickel	Finland	63.84	25.04	Operating	0.025214		Magmatic Sulphide	Scientific Article: Miettunen et al. (2015) A few aspects of the connections between ore mineralogy and flotation results at Hitura nickel mine in Finland. Mining, Metallurgy & Exploration, 32: 38-44.
Delta	Nickel	Canada	61.48	-74.48	Reserves Development	0.025		Magmatic Sulphide	"Comments" section of the S&P Database
Beta Hunt	Gold	Australia	-31.22	121.67	Operating	0.02478	Komatiitic Magmatic, Mesothermal Lode Gold	Magmatic Sulphide	S&P Database, Company Website: https://www.karoraresources.com/beta-hunt-mine
Windarra Tailings	Gold	Australia	-28.49	122.24	Feasibility Started	0.0246		Tailings	S&P Database, Company Website: https://poseidon-nickel.com.au/mt-windarra/
Higdon	Lead	USA	37.6	-90.14	Reserves Development	0.0238		Mississippi Valley Type	Scientific Article: Avila (2010) Rediscovering Southwest Missouri Mississippi Valley-Type Pb-Zn Deposits: The Co-Ni Enriched Higdon Deposit, Madison and Perry Counties. M.Sc. Thesis, Southern Illinois University.
Alexo-Dundonald	Nickel	Canada	48.65	-80.8	Reserves Development	0.023247	Volcanogenic Massive Sulfide (VMS)	Magmatic Sulphide	Note: S&P classificaiton is incorrect - this is a komatiite-hosted deposit, not a VMS. Company Website: https://www.class1nickel.com/alexo-dundonald/
Fortaleza de Minas	Nickel	Brazil	-20.89	-46.7	Closed	0.023	Komatiitic Magmatic	Magmatic Sulphide	S&P Database, Scientific Article: de Almeida et al. (2007) The Ni-Cu-PGE Sulfide Ores of the Komatiite-hosted Fortaleza de Minas Deposit, Brazil: Evidence of Hydrothermal Remobilization. The Canadian Mineralogist, 45(4): 751-773.
Hadbah	Nickel	Saudi Arabia	18.11	44.13	Target Outline	0.023		Magmatic Sulphide	Scientific Article: Carten and Tayeb (1990) Formation of volcanic-exhalative nickel-sulfide deposits at a Late Proterozoic spreading ridge in the proto-Arabian shield. Canadian Journal of Earth Sciences, 27(6), https://doi.org/10.1139/e90-076.
Blue Lake	Copper	Canada	55.22	-66.13	Reserves Development	0.023	Komatiitic Magmatic	Magmatic Sulphide	"Comments" section of the S&P Database
Riverina	Nickel	Australia	-29.74	120.56	Reserves Development	0.0222	Laterite (Generic)	Laterite	S&P Database, including "Comments" section
Fond du Lac	Nickel	Canada	59.38	-105.93	Reserves Development	0.022		Magmatic Sulphide	"Comments" section of the S&P Database
Ertelien	Nickel	Norway	60.06	10.04	Reserves Development	0.022		Magmatic Sulphide	"Comments" section of the S&P Database
Scotia	Nickel	Australia	-30.05	121.22	Reserves Development	0.0214		Magmatic Sulphide	Scientific Article: Page and Schmulian (1981) The proximal volcanic environment of the Scotia nickel deposits. Economic Geology, 76(6): 1469-1479.
Juruogou	Nickel	China	44.53	117.52	Reserves Development	0.021226		Unknown	Unable to find information on this deposit
Munni Munni	Palladium	Australia	-21.11	116.82	Feasibility	0.021	Layered Mafic-Ultramafic Intrusion	Magmatic Sulphide	S&P Database, Company Website: https://platinaresources.com.au/projects-munni-munni/
Tuli	Nickel	Botswana	-23.07	27.83	Reserves Development	0.021		Magmatic Sulphide	"Comments" section of the S&P Database
Berlin	Uranium	Colombia	5.61	-74.98	Prefeas/Scoping	0.020502	Black Shale, Phosphorite	Black Shale	S&P Database, including "Comments" section
Firebird	Nickel	Canada	59.33	-106.01	Exploration	0.0204		Magmatic Sulphide	Company Website: https://www.alxresources.com/projects/energy-metals/firebird-nickel-project
Redstone	Nickel	Canada	48.31	-81.16	Operating	0.02		Magmatic Sulphide	Company Website: http://northernsunmining.ca/Projects/Redstone-Mine/default.aspx
Imbasa	Platinum	South Africa	-25.6	27.67	Reserves Development	0.02		Magmatic Sulphide	"Comments" section of the S&P Database
Bluebush Line	Nickel	Australia	-31.6	121.79	Reserves Development	0.0199		Magmatic Sulphide	Company Website: https://www.mincor.com.au/site/projects/nickel/nickel-exploration
Fujia	Nickel	China	42.86	126.49	Reserves Development	0.019		Magmatic Sulphide	Scientific Article: Lu et al. (2011) Pyrrhotite Re-Os and SHRIMP zircon U-Pb dating of the Hongqiling Ni-Cu sulfide deposits in Northeast China. Ore Geology Reviews, 43(1): 106-119.
Kungurskoye	Nickel	Russia	56.84	59.88	Reserves Development	0.0186		Laterite	"Comments" section of the S&P Database
Daling	Nickel	China	42.89	126.44	Reserves Development	0.0186		Magmatic Sulphide	"Comments" section of the S&P Database
Las Aguilas	Copper	Argentina	-33.12	-66.12	Reserves Development	0.0185	Layered Mafic-Ultramafic Intrusion	Magmatic Sulphide	S&P Database, Scientific Article: Skirrow and Sims (1999) Genesis and setting of intrusion-hosted Ni-Cu mineralization at Las Aguilas, San Luis Province, Argentina; implications for exploration of an Ordovician arc. Exploration and Mining Geology, 8(1-2): 1-20.
No. 20	Nickel	China	42.28	94.77	Preproduction	0.01809		Magmatic Sulphide	Company Website: http://www.huili.hk/en/bus.php
Madison	Cobalt	USA			Reserves Development	0.018039		Mississippi Valley Type	Company Website: https://www.mocobalt.com/
Ravensthorpe East	Copper	Australia	-33.34	119.97	Target Outline	0.018		Magmatic Sulphide	"Comments" of the S&P Database. There is laterite mineralisation in the area, but this is a sulphide deposit.
Sakharevskoye	Nickel	Russia	57.48	61.62	Reserves Development	0.018		Laterite	"Comments" section of the S&P Database.
Waite Kauri	Nickel	Australia	-28.69	121.72	Reserves Development	0.018	Laterite (Generic)	Laterite	S&P Database, including "Comments" section
Bird River	Nickel	Canada	50.48	-95.5	Reserves Development	0.017841		Magmatic Sulphide	Scientific Article: Scoates and Scoates (2013) Age of the Bird River Sill, Southeastern Manitoba, Canada, with Implications for the Secular Variation of Layered Intrusion-Hosted Stratiform Chromite Mineralization. Economic Geology, 108(4): 895-907.
Shining Tree	Nickel	Canada	47.56	-81.18	Reserves Development	0.0172		Magmatic Sulphide	Company Website: https://magnamining.com/portfolio_page/shining-tree/
Magogaphate	Nickel	Botswana	-21.65	28.3	Feasibility Started	0.017136	Layered Mafic-Ultramafic Intrusion	Magmatic Sulphide	S&P Database, including "Comments" section
Norton	Nickel	Canada	51.9	-87.42	Reserves Development	0.016311		Magmatic Sulphide	Company Website: http://copperlakeresources.com/properties/norton-lake/
Sinclair	Nickel	Australia	-28.37	120.86	Reserves Development	0.0162	Komatiitic Magmatic, Layered Mafic-Ultramafic Intrusion	Magmatic Sulphide	"Comments" section of the S&P Database
Labrador Trough	Copper	Canada	58.08	-69.83	Reserves Development	0.015	Volcanogenic Massive Sulfide (VMS)	Magmatic Sulphide	S&P Database, including "Comments" section
Goodyear	Nickel	Australia	-31	121.68	Reserves Development	0.015		Magmatic Sulphide	"Comments" section of the S&P Database
New Morning	Nickel	Australia	-32.45	119.68	Reserves Development	0.015		Magmatic Sulphide	"Comments" section of the S&P Database
Premiere Ridge	Nickel	Canada	46.71	-81.16	Feasibility	0.015		Magmatic Sulphide	"Comments" section of the S&P Database
Hualong	Nickel	China	36.09	102.26	Operating	0.015		Unknown	Not able to find much information on this deposit. Most likely a magmatic sulphide deposit.
Waterloo	Nickel	Australia	-28.14	120.97	Operating	0.0144		Magmatic Sulphide	Scientific Article: Mutton and Peters (2004) The Waterloo and Amorac nickel deposits, Western Australia: A geophysical case history, ASEG Extended Abstracts, 2004:1, 1-8, DOI: 10.1071/ASEG2004ab105
Shebandowan	Nickel	Canada	48.6	-90.28	Reserves Development	0.0139		Magmatic Sulphide	"Comments" section of the S&P Database
Hautalampi	Nickel	Finland	62.71	28.97	Advanced Exploration	0.0136		Magmatic Sulphide	"Comments" section of the S&P Database
Nepean	Nickel	Australia	-31.16	121.08	Feasibility	0.01325		Magmatic Sulphide	Company Website: https://www.aurochminerals.com/project/nepean-nickel-project/
Gochager Lake	Cobalt	Canada	55.79	-104.96	Target Outline	0.01301		Magmatic Sulphide	Company Website: https://www.cameocobalt.com/gochager-lake-nickel-copper-cobalt-project/
Ghan Well	Nickel	Australia	-28.87	122.13	Reserves Development	0.0119	Laterite (Generic)	Laterite	S&P Database, Company Website: https://wcminerals.com.au/ghan-well/
Kotalahti Production Centre	Nickel	Finland	63.02	28.82	Reserves Development	0.011856		Magmatic Sulphide	"Comments" section of the S&P Database
Lac Rocher	Nickel	Canada	50.58	-76.34	Prefeas/Scoping	0.01176	Layered Mafic-Ultramafic Intrusion	Magmatic Sulphide	S&P Database, Company Website: http://www.victorynickel.ca/projects/lac_rocher/
Poissons Blancs	Nickel	Canada	49.33	-72.17	Reserves Development	0.011102		Magmatic Sulphide	"Comments" section of the S&P Database
Nicobi	Nickel	Canada	49.32	-75.97	Target Outline	0.011		Magmatic Sulphide	Company Press Release: https://www.northernminer.com/news/minorca-drilling-at-nicobi-lake/1000136205/
Tonghua	Nickel	China	41.66	125.74	Limited Production	0.011		Magmatic Sulphide	"Comments" section of the S&P Database
Mareesburg 8 JT	Platinum	South Africa	-25.03	30.13	Feasibility Started	0.011		Magmatic Sulphide	"Comments" section of the S&P Database
Tochilnogorskoye	Nickel	Russia	57.49	61.18	Reserves Development	0.011		Laterite	"Comments" section of the S&P Database
Norpax	Copper	Canada	50.46	-95.01	Reserves Development	0.011		Magmatic Sulphide	Canadian Government Database: https://www.geologyontario.mndm.gov.on.ca/mndmfiles/mdi/data/records/MDI52L06NE00016.html
Segalla	Nickel	South Africa	-25.66	31.09	Reserves Development	0.011		Unknown	Not able to find much information on this deposit. Near the Bon Accord deposit, so could be a magmatic sulphide deposit.
Manticao	Nickel	Philippines	8.35	124.39	Reserves Development	0.011	Laterite (Generic)	Laterite	S&P Database, including "Comments" section
Lake Aulneau	Copper	Canada	56.97	-68.56	Reserves Development	0.01087		Magmatic Sulphide	Company Website: http://www.harfangexploration.com/en/
Lainejaur	Nickel	Sweden	65.24	18.98	Reserves Development	0.0101		Magmatic Sulphide	Company Website: https://carnabyresources.com.au/projects/lainejaur-nickel-project/
Sahakoski	Nickel	Finland	61.64	21.69	Reserves Development	0.01		Magmatic Sulphide	Scientific Article: Makkonen et al. (2017) Ni-(Cu-PGE) deposits in Finland - Geology and exploration potential. Ore Geology Reviews, 90: 667-696.
Xinsheng Mining	Copper	China	23.6	101.96	Preproduction	0.01		Magmatic Sulphide	Company Website: http://www.xinshengzj.com/html/en/
Gabanintha	Gold	Australia	-26.93	118.64	Reserves Development	0.0095		Magmatic Sulphide	Compay Website: https://www.bryah.com.au/site/content/
Shinkolobwe	Uranium	Dem. Rep. Congo	-11.05	26.54	Closed	0.0094	Vein Hosted	Vein-Hosted	S&P Database, including "Comments" section
Collurabbie Hills	Nickel	Australia	-26.82	122.18	Reserves Development	0.009314	Komatiitic Magmatic	Magmatic Sulphide	S&P Database, including "Comments" section
No. 2	Nickel	China	42.28	94.67		0.00861		Magmatic Sulphide	"Comments" section of S&P Database, Company Website: http://www.huili.hk/en/bus_resources.php
Carr Boyd	Nickel	Australia	-30.05	121.63	Reserves Development	0.0086		Magmatic Sulphide	Company Website: https://www.estrellaresources.com.au/projects/carr-boyd-nickel-project/
Lucky Break	Nickel	Australia	-19.47	145.69	Feasibility	0.008595	Laterite (Generic)	Laterite	S&P Database, including "Comments" section
Kambalda West	Nickel	Australia	-31.35	121.5	Reserves Development	0.0083		Magmatic Sulphide	"Comments" section of the S&P Database. Note that there is also laterite nickel in this area.
Leinster	Nickel	Australia	-28.16	120.91	Reserves Development	0.0083		Magmatic Sulphide	"Comments" section of the S&P Database
Langmuir W4	Nickel	Canada	48.29	-81.03	Reserves Development	0.008224		Magmatic Sulphide	Company Website: https://www.rogueresources.ca/langmuir-project
Glenbrook	Nickel	USA	42.96	-123.44	Closed	0.0074		Laterite	Scientific Article: Hotz (1964) Nickeliferous laterites in southwest Oregon and northwestern California. Economic Geology, 59(3): 355-396.
Inner Mongolia	Nickel	China	41.48	111.68	Feasibility	0.0074		Unknown	Not able to find much information on this deposit. Probably a magmatic sulphide deposit.
Stormi	Nickel	Finland	61.33	23.02	Reserves Development	0.007		Magmatic Sulphide	Company Press Release: http://www.dragonmining.com/static/files/41/2014-03-18__resource_updates_for_the_stormi_and_ekojoki_nickel-copper_deposits.pdf
Al Hamurah	Copper	Yemen	13.32	44.28	Target Outline	0.007		Magmatic Sulphide	Scientific Article: Saeed (2012) Etude des Minéralisation à Cu –Ni de la Région de Al-Hamurah – Yémen. M.Sc. Thesis, Houari Boumedin University.
Lac Pegma	Copper	Canada	52.37	-66.76	Exploration	0.007		Magmatic Sulphide	Company Website: http://avidiangold.com/lac-pegma-property-quebec/
St Stephen	Nickel	Canada	45.21	-67.31	Reserves Development	0.006991		Magmatic Sulphide	Scientific Article: Paktunc (1989) Petrology of the St. Stephen Intrusion and the genesis of related nickel-copper sulfide deposits. Economic Geology, 84(4): 817-840.
Mt Cobalt	Nickel	Australia	-26.19	152.27	Reserves Development	0.006981		Laterite	Company Website: https://www.austinmining.com.au/queensland-projects. Likely magmatic sulphide mineralization underneath.
Marriott's	Nickel	Australia	-28.45	120.99	Reserves Development	0.0069	Intrusive Related, Komatiitic Magmatic	Magmatic Sulphide	Company Website: https://norwestminerals.com.au/marriotts/
Pacific Express	Nickel	Australia	-31.57	152.79	Reserves Development	0.006301	Laterite (Ni-Co - Limonite)	Laterite	S&P Database, including "Comments" section
Grootboom	Platinum	South Africa	-24.76	30.17	Feasibility	0.006		Magmatic Sulphide	"Comments" section of the S&P Database
East Bull	Palladium	Canada	46.41	-82.24	Reserves Development	0.006		Magmatic Sulphide	Company Website: https://canadianpalladium.com/project/bull-project/
Loveland	Nickel	Canada	48.67	-81.72	Reserves Development	0.0059		Magmatic Sulphide	"Comments" section of the S&P Database
Madziwa	Nickel	Zimbabwe	-17.06	31.65	Closed	0.0058		Magmatic Sulphide	Scientific Article: Prendergast and Wilson (2015) The Nickeliferous Archean Madziwa Igneous Complex, Northern Zimbabwe: Petrological Evolution, Magmatic Architecture, and Ore Genesis. Economic Geology, 110(5): 1295-1312.
Canalask	Nickel	Canada	61.96	-140.5	Target Outline	0.0053		Magmatic Sulphide	Company Website: https://vgcx.com/exploration/non-core-properties/canalask/
Loveland	Nickel	Canada	48.66	-81.62	Target Outline	0.005262	Layered Mafic-Ultramafic Intrusion	Magmatic Sulphide	S&P Database, including "Comments" section
Government Ground	Platinum	South Africa	-24.38	29.78	Reserves Development	0.0051		Magmatic Sulphide	"Comments" section of the S&P Database
Sumas Mountain	Nickel	USA	48.9	-122.25	Reserves Development	0.0047		Laterite	United States Government Database: https://mrdata.usgs.gov/mrds/show-mrds.php?dep_id=10047811
South Dinagat	Nickel	Philippines	9.84	125.61	Reserves Development	0.0046	Laterite (Generic)	Laterite	S&P Database, including "Comments" section
Njuggtraskliden	Nickel	Sweden	64.82	19.28	Reserves Development	0.0041		Magmatic Sulphide	Company Website: https://www.emxroyalty.com/royalties/sweden/nickel-line/
Nikkel Og Olivin	Nickel	Norway	68.31	16.68	Closed	0.004		Magmatic Sulphide	Geological Survey of Norway Database: https://aps.ngu.no/pls/oradb/minres_deposit_fakta.Main?p_objid=2444&p_spraak=E
Miriam	Nickel	Australia	-31.07	121.08	Target Outline	0.0039		Magmatic Sulphide	"Comments" section of the S&P Database
Massey-Whitesides	Nickel	Canada	48.45	-81.82	Target Outline	0.0039		Magmatic Sulphide	Canadian Government Database: http://www.geologyontario.mndm.gov.on.ca/mndmfiles/afri/data/imaging/20000002259/20003591.pdf
Vulcain	Nickel	Canada	46.81	-76.7	Reserves Development	0.00388		Magmatic Sulphide	"Comments" section of the S&P Database
Jacobus	Copper	Canada	49.85	-87.75	Reserves Development	0.0038		Magmatic Sulphide	"Comments" section of the S&P Database
Dundonald	Nickel	Canada	48.63	-80.84	Reserves Development	0.0037	Komatiitic Magmatic	Magmatic Sulphide	S&P Database, Company Website: https://www.class1nickel.com/alexo-dundonald/
Rostvangen-Kvikne-Vakkerlien	Copper	Norway	62.52	10.31	Target Outline	0.003629	Volcanogenic Massive Sulfide (VMS)	Magmatic Sulphide	"Comments" section of the S&P Database
Elmhirst	Copper	Canada	49.83	-87.76	Target Outline	0.0036		Magmatic Sulphide	Canadian Government Database: http://www.geologyontario.mndm.gov.on.ca/mndmfiles/afri/data/imaging/20000002587/20004035.pdf
Ajax	Copper	Canada	47.1	-79.84	Target Outline	0.0032		Magmatic Sulphide	Company Website: https://kghm.com/en/our-business/projects-under-development/ajax
Snake Hill	Nickel	Australia	-29.22	120.53	Exploration	0.0032		Magmatic Sulphide	Company Press Release: https://www.heronresources.com.au/downloads/reports/annual/hrr_ar_1997.pdf
McWatters	Nickel	Canada	48.31	-81.03	Operating	0.0032		Magmatic Sulphide	Company Website: http://northernsunmining.ca/Projects/McWatters-Mine/default.aspx
Carnilya Hill	Nickel	Australia	-31.05	121.86	Reserves Development	0.003	Komatiitic Magmatic	Magmatic Sulphide	S&P Database, including "Comments" section
Villebon	Copper	Canada	47.89	-77.29	Reserves Development	0.003		Magmatic Sulphide	Company Website: https://www.universalcopper.com/villebon
Sothman	Nickel	Canada	47.84	-81.24	Reserves Development	0.0028		Magmatic Sulphide	"Comments" section of the S&P Database
Langmuir 2	Nickel	Canada	48.34	-81	Reserves Development	0.0028		Magmatic Sulphide	Canadian Government Database: http://www.geologyontario.mndm.gov.on.ca/mndmfiles/mdi/data/records/MDI42A06SE00006.html
Mt Fitch	Copper	Australia	-12.94	130.95	Reserves Development	0.0026		Unconformity Type Uranium Associated	"Commments" section of the S&P Database
Hidden Bay	Uranium	Canada	58.15	-103.73	Prefeas/Scoping	0.002568	Unconformity Related	Unconformity Type Uranium Associated	"Comments" section of the S&P Database
Armstrong	Nickel	Australia	-31.5	121.53	Reserves Development	0.00237		Magmatic Sulphide	"Comments" section of the S&P Database, Company Website: https://www.estrellaresources.com.au/projects/spargoville-project/
Bunkerville	Copper	USA	36.61	-114.16	Reserves Development	0.0022		Magmatic Sulphide	United States Government Database: https://pubs.usgs.gov/sir/2006/5197/sir2006-5197c.pdf
Yasinski	Nickel	Canada	53.32	-77.28	Exploration	0.002		Unknown	Not able to find much information on this deposit. Probably a magmatic sulphide deposit.
Nickel Island	Nickel	Canada	48.63	-80.87	Target Outline	0.0019		Magmatic Sulphide	Canadian Government Database: http://www.geologyontario.mndm.gov.on.ca/mndmfiles/afri/data/imaging/42A10NW2004/42A10NW2004.pdf
Sarkalahti	Nickel	Finland	62.5	27.88	Reserves Development	0.0019		Magmatic Sulphide	Scientific Article: Makkonen et al. (2017) Ni-(Cu-PGE) deposits in Finland - Geology and exploration potential. Ore Geology Reviews, 90: 667-696.
Mantymaki	Nickel	Finland	61.31	22.8	Reserves Development	0.001824		Magmatic Sulphide	"Comments" section of the S&P Database
Hyvela	Nickel	Finland	61.54	21.81	Reserves Development	0.001753		Magmatic Sulphide	"Comments" section of the S&P Database
Saramaki	Copper	Finland	62.93	29.13	Reserves Development	0.0017		Magmatic Sulphide	"Comments" section of the S&P Database
Mt Jewell	Nickel	Australia	-30.18	121.45	Reserves Development	0.0017		Magmatic Sulphide	"Comments" section of the S&P Database
Midrim	Copper	Canada	47.47	-79.23	Prefeas/Scoping	0.0016	Layered Mafic-Ultramafic Intrusion	Magmatic Sulphide	S&P Database, including "Comments" section
Mirror Harbor	Nickel	USA	57.78	-136.3	Target Outline	0.0015		Magmatic Sulphide	United States Government Database: https://dggs.alaska.gov/webpubs/usbm/ri/text/ri4168.pdf
Corkwood	Nickel	Australia	-17.29	128.18	Exploration	0.0015		Magmatic Sulphide	Scientific Article: Hoatson et al. (2006) Nickel sulfide deposits in Australia: Characteristics, resources, and potential. Ore Geology Reviews, 29: 177-241.
Kylylahti	Copper	Finland	62.85	29.33	Operating	0.0013		Magmatic Sulphide	"Comments" section of the S&P Database
Niinimaki	Nickel	Finland	61.67	27.94	Reserves Development	0.001082		Magmatic Sulphide	"Comments" section of the S&P Database
Sirrka	Nickel	Finland	67.81	24.73	Target Outline	0.00091		Orogenic Gold Associated	Scientific Article: Holma et al. (2007) The Sirkka Au-Cu-Ni-Co occurrence, northern Finland: an orogenic gold deposit with multimetallic, atypical metal association. Proceedings of the Ninth Biennial SGA Meeting, Dublin 2007.
Sarkiniemi	Nickel	Finland	62.57	27.66	Reserves Development	0.0007		Magmatic Sulphide	"Comments" section of the S&P Database
RM	Nickel	Canada	48.2	-79.27	Reserves Development	0.000607		Magmatic Sulphide	"Comments" section of the S&P Database
Wollogorang	Cobalt	Australia	-16.72	137.77	Prefeas/Scoping	0.00056	Breccia Pipes, Sediment Hosted Red Bed	Sediment Hosted	S&P Database, including "Comments" section
Milestone	Copper	Canada	47.03	-79.82	Target Outline	0.000454		Magmatic Sulphide	Company Website: https://northstargoldcorp.com/projects/milestone-cu-ni-co/
Broken Hammer	Copper	Canada	46.76	-81.03	Closed	0.000454	Astrobleme	Magmatic Sulphide	S&P Database, including "Comments" section
Midwest Northeast	Uranium	Canada	58.33	-104.03	Prefeas/Scoping	0.000283	Unconformity Related	Unconformity Type Uranium Associated	S&P Database, including "Comments" section
River's Option	Nickel	Canada	46.82	-81.31	Target Outline	0.000266		Magmatic Sulphide	"Comments" section of the S&P Database
Riihilahti	Nickel	Finland	62.71	28.69	Reserves Development	0.000216		Magmatic Sulphide	"Comments" section of the S&P Database
Castle	Silver	Canada	47.67	-80.74	Reserves Development	1.5e-05		Vein Hosted	Canadian Government Database: http://www.geologyontario.mndm.gov.on.ca/mndmfiles/afri/data/imaging/20000014046/2_56259_10_AssessmentReport_CastleSilver_August2015_1of4.pdf
									General note: where it says "Comments" section of the S&P Database, information could also have been taken from other fields with text data, such as the "Work History" or "Document Highlights" sections of the database.
