# Supplementary material for: Biomass carbon emissions from nickel mining have significant implications for climate action
Source: Research Square preprint supplement (doi:10.21203/rs.3.rs-2469411/v1), 2023-02-01
Supplement: Supplementary file 3 [file 41607167dd6a4685ec28a2be.xlsx]

## Sheet: Sheet1
Mine Site:	Country:	Mine Type:	Land Disturbance Area (m2):	Land Disturbance (km2):	Land Disturbance Area Data Source:	Cumulative Production to 2020 (t nickel):	Cumulative Production to 2020 (Mt nickel):	Cumulative Production Data Source:	Land Transformation Factor (m2 / t nickel):	Aboveground Biomass - Average in 5 km Buffer (t C / ha):	Belowground Biomass - Average in 5 km Buffer (t C / ha):	Aboveground and Belowground Biomass - Average in 5 km Buffer (t C / ha):	Total Biomass Carbon Loss (t C):	Total Biomass Carbon Loss (t CO2e):	Total Biomass Carbon Loss (Mt CO2e):	t CO2e / t nickel:
Sulfides:
Mount Keith	Australia	Open Pit	4.158e+07	41.58	This Study	1100225	1.10023	Mudd and Jowitt (2022)	37.7923	0.416843	1.66219	2.07903	8644.61	31696.9	0.0316969	0.0288095
Flying Fox-Forrestania	Australia	Open Pit and Underground	1.69674e+06	1.69674	Werner et al. (2020)	326295	0.326295	Mudd and Jowitt (2022)	5.20001	29.908	22.1046	52.0126	8825.16	32358.9	0.0323589	0.0991709
Avebury	Australia	Underground	725883	0.725883	This Study	2862.3	0.0028623	Mudd and Jowitt (2022)	253.601	99.8321	26.2294	126.062	9150.59	33552.2	0.0335522	11.7221
Nova-Bollinger	Australia	Underground	4.08708e+06	4.08708	This Study	101208	0.101208	Mudd and Jowitt (2022)	40.3828	25.944	19.9149	45.8589	18742.9	68724	0.068724	0.679034
Savannah	Australia	Open Pit and Underground	746938	0.746938	Werner et al. (2020)	100500	0.1005	S&P Database	7.43222	1.13673	4.12964	5.26637	393.365	1442.34	0.00144234	0.0143516
Phoenix and Selebi-Phikwe	Botswana	Open Pit and Underground	6.98689e+06	6.98689	This Study	89995	0.089995	S&P Database	77.6364	9.81873	13.8953	23.714	16568.7	60752	0.060752	0.67506
Santa Rita	Brazil	Open Pit and Underground	6.15938e+06	6.15938	Werner et al. (2020)	26597.4	0.0265974	Mudd and Jowitt (2022)	231.578	31.141	9.55154	40.6925	25064.1	91901.6	0.0919016	3.45528
Sudbury Basin	Canada	Open Pit and Underground	5.22607e+07	52.2607	This Study	1.19913e+07	11.9913	Mudd and Jowitt (2022)	4.35821	24.6938	12.1831	36.8768	192721	706644	0.706644	0.0589296
Voisey's Bay	Canada	Open Pit and Underground	3.3535e+06	3.3535	Werner et al. (2020)	770250	0.77025	S&P Database	4.35378	24.1261	12.8539	36.98	12401.2	45471.2	0.0454712	0.0590344
Bucko Lake	Canada	Underground	1.28185e+06	1.28185	This Study	3142	0.003142	S&P Database	407.973	22.3158	11.5399	33.8557	4339.79	15912.6	0.0159126	5.06447
Raglan	Canada	Open Pit and Underground	3.72236e+06	3.72236	This Study	620786	0.620786	Mudd and Jowitt (2022)	5.99621	0.252747	1.01318	1.26593	471.224	1727.82	0.00172782	0.00278328
Thompson	Canada	Open Pit and Underground	1.87628e+07	18.7628	Liang et al. (2021)	2.45582e+06	2.45582	Mudd and Jowitt (2022)	7.64014	25.7945	12.1024	37.8969	71105.3	260719	0.260719	0.106164
Kevitsa	Finland	Open Pit	6.98689e+06	6.98689	Werner et al. (2020)	89995	0.089995	Mudd and Jowitt (2022)	77.6364	22.3347	14.7768	37.1115	25929.4	95074.4	0.0950744	1.05644
Hitura	Finland	Open Pit and Underground	1.97836e+06	1.97836	This Study	90369.4	0.0903694	Mudd and Jowitt (2022)	21.8919	22.8393	15.4171	38.2564	7568.48	27751.1	0.0277511	0.307085
Norilsk-Talnakh	Russia	Open Pit and Underground	9.15546e+07	91.5546	This Study	8.3e+06	8.3	Barnes et al. (2020)	11.0307	2.62866	5.10792	7.73658	70831.9	259717	0.259717	0.0312912
Nkomati	South Africa	Open Pit and Underground	6.05902e+06	6.05902	Werner et al. (2020)	207295	0.207295	Mudd and Jowitt (2022)	29.229	33.3377	17.284	50.6217	30671.8	112463	0.112463	0.542529
Aguablanca	Spain	Open Pit and Underground	2.4802e+06	2.4802	Werner et al. (2020)	66659	0.066659	S&P Database	37.2072	9.13659	7.46922	16.6058	4118.57	15101.4	0.0151014	0.226547
Eagle	USA	Underground	633036	0.633036	Werner et al. (2020)	125325	0.125325	S&P Database	5.05115	50.2792	18.822	69.1012	4374.35	16039.3	0.0160393	0.127982
Ta Khoa / Ban Phuc	Vietnam	Open Pit and Underground	396588	0.396588	This Study	20899	0.020899	Mudd and Jowitt (2022)	18.9764	25.0097	11.4298	36.4395	1445.15	5298.88	0.00529888	0.253547
Laterites:
Murrin Murrin	Australia	Open Pit	2.81438e+07	28.1438	Werner et al. (2020)	658211	0.658211	Mudd and Jowitt (2022)	42.7581	0.535655	1.93454	2.47019	6952.07	25490.9	0.0254909	0.0387276
Ravensthorpe	Australia	Open Pit	1.45445e+07	14.5445	Werner et al. (2020)	193922	0.193922	S&P Database	75.0019	16.0162	11.7411	27.7572	40371.6	148029	0.148029	0.763343
Onca Puma	Brazil	Open Pit	4.30151e+06	4.30151	Werner et al. (2020)	160000	0.16	S&P Database	26.8844	18.6156	5.12825	23.7439	10213.5	37449.4	0.0374494	0.234059
Barro Alto	Brazil	Open Pit	1.74579e+07	17.4579	This Study	275200	0.2752	S&P Database	63.437	21.3778	12.0983	33.4761	58442.1	214288	0.214288	0.778662
Codemin	Brazil	Open Pit	4.1093e+07	41.093	This Study	191100	0.1911	Mudd and Jowitt (2022)	215.034	26.1611	16.4635	42.6246	175157	642243	0.642243	3.36077
Cerro Matoso	Colombia	Open Pit	8.24366e+06	8.24366	Werner et al. (2020)	1.65088e+06	1.65088	Mudd and Jowitt (2022)	4.99349	14.9927	5.68999	20.6827	17050.1	62517	0.062517	0.0378689
Moa Bay and Punta Gorda	Cuba	Open Pit	5.4777e+07	54.777	This Study	1.30457e+06	1.30457	Mudd and Jowitt (2022)	41.9885	29.5258	9.68676	39.2126	214795	787580	0.78758	0.603709
Falcondo	Dominican Republic	Open Pit	6.41986e+06	6.41986	This Study	1241246	1.24125	Mudd and Jowitt (2022)	5.17211	29.0749	9.40483	38.4798	24703.5	90579.4	0.0905794	0.0729745
Fenix	Gautemala	Open Pit	4.31721e+06	4.31721	This Study	266573	0.266573	Mudd and Jowitt (2022)	16.1952	58.7776	14.4348	73.2125	31607.4	115894	0.115894	0.434754
Weda Bay	Indonesia	Open Pit	2.66111e+06	2.66111	This Study	23500	0.0235	S&P Database	113.239	114.408	26.4228	140.831	37476.7	137415	0.137415	5.84743
Sorowako	Indonesia	Open Pit	3.17415e+07	31.7415	This Study	2141467	2.14147	Mudd and Jowitt (2022)	14.8223	69.7217	17.1472	86.8689	275735	1.01103e+06	1.01103	0.47212
Ambatovy	Madagascar	Open Pit	9.48781e+06	9.48781	This Study	259664	0.259664	S&P Database	36.5388	57.2001	16.2951	73.4952	69730.9	255680	0.25568	0.984656
Tagaung Taung	Myanmar	Open Pit	3.81462e+06	3.81462	This Study	16999	0.016999	Mudd and Jowitt (2022)	224.403	28.3116	7.61163	35.9232	13703.3	50245.6	0.0502456	2.9558
Koniambo	New Caledonia	Open Pit	6.21751e+06	6.21751	Werner et al. (2020)	140700	0.1407	S&P Database	44.1898	10.5382	4.37383	14.912	9271.58	33995.8	0.0339958	0.241619
Goro	New Caledonia	Open Pit	9.12134e+06	9.12134	Werner et al. (2020)	236129	0.236129	S&P Database	38.6286	16.6494	9.30635	25.9557	23675.1	86808.8	0.0868088	0.367633
All New Caledonia	New Caledonia	Open Pit	1.4921e+08	149.21	Liang et al. (2021)	7286158	7.28616	Updated from Mudd and Jowitt (2022)	20.4786	18.6499	7.42192	26.0718	389018	1.4264e+06	1.4264	0.195768
Ramu	Papua New Guinea	Open Pit	1.8875e+06	1.8875	This Study	221891	0.221891	S&P Database	8.50645	88.2166	21.0063	109.223	20615.9	75591.5	0.0755915	0.34067
Gordes	Turkey	Open Pit	4.09457e+06	4.09457	This Study	64684	0.064684	Mudd and Jowitt (2022)	63.3011	12.2458	4.86945	17.1152	7007.93	25695.8	0.0256958	0.397251
Loma de Niquel	Venezuela	Open Pit	3.69571e+06	3.69571	This Study	163500	0.1635	Mudd and Jowitt (2022)	22.6037	45.7576	14.6937	60.4513	22341	81917.2	0.0819172	0.501022
