# Supplementary material for: Biomass carbon emissions from nickel mining have significant implications for climate action
Source: Research Square preprint supplement (doi:10.21203/rs.3.rs-2469411/v1), 2023-02-01
Supplement: Supplementary file 4 [file eb3316dcad890e5e23a519fe.xlsx]

## Sheet: Sheet1
												Assumed Land Transformation Factor (m2 / t nickel):
Project Name:	Deposit Type:	Country:	Latitude (degrees):	Longitude (degrees):	Nickel Reserves and Resources (tonnes):	Nickel Reserves and Resources (Mt):	Aboveground C Mean - 5 km Circle (t C / ha):	Belowground C Mean - 5 km Circle (t C / ha):	Total Estimated Biomass Carbon Loss (t C / ha):	Total Estimated Biomass Carbon Loss (t C / m2):	Total Estimated Biomass Carbon Loss (t CO2e / m2):	1	2	3	4	5	6	7	8	9	10	11	12	13	14	15	16	17	18	19	20	21	22	23	24	25	26	27	28	29	30	31	32	33	34	35	36	37	38
Iisko-Tagulsk	Magmatic Sulfide	Russia	54.37	98.77	7500000	7.5	52.0224	18.0121	70.0345	0.00700345	0.0257027	0.0257027	0.0514053	0.077108	0.102811	0.128513	0.154216	0.179919	0.205621	0.231324	0.257027	0.282729	0.308432	0.334135	0.359837	0.38554	0.411243	0.436945	0.462648	0.488351	0.514053	0.539756	0.565459	0.591161	0.616864	0.642567	0.668269	0.693972	0.719675	0.745377	0.77108	0.796783	0.822485	0.848188	0.873891	0.899593	0.925296	0.950999	0.976701
Dumont	Magmatic Sulfide	Canada	48.64	-78.44	5720702	5.7207	38.4568	16.092	54.5488	0.00545488	0.0200194	0.0200194	0.0400388	0.0600582	0.0800777	0.100097	0.120116	0.140136	0.160155	0.180175	0.200194	0.220214	0.240233	0.260252	0.280272	0.300291	0.320311	0.34033	0.360349	0.380369	0.400388	0.420408	0.440427	0.460447	0.480466	0.500485	0.520505	0.540524	0.560544	0.580563	0.600582	0.620602	0.640621	0.660641	0.68066	0.70068	0.720699	0.740718	0.760738
Turnagain	Magmatic Sulfide	Canada	58.47	-128.86	4844347	4.84435	36.0553	16.3934	52.4487	0.00524487	0.0192487	0.0192487	0.0384974	0.057746	0.0769947	0.0962434	0.115492	0.134741	0.153989	0.173238	0.192487	0.211735	0.230984	0.250233	0.269481	0.28873	0.307979	0.327228	0.346476	0.365725	0.384974	0.404222	0.423471	0.44272	0.461968	0.481217	0.500466	0.519714	0.538963	0.558212	0.57746	0.596709	0.615958	0.635206	0.654455	0.673704	0.692952	0.712201	0.73145
Honeymoon Well	Magmatic Sulfide	Australia	-26.92	120.37	4007000	4.007	0.400617	1.69001	2.09063	0.000209063	0.000767261	0.000767261	0.00153452	0.00230178	0.00306904	0.0038363	0.00460356	0.00537083	0.00613809	0.00690535	0.00767261	0.00843987	0.00920713	0.00997439	0.0107417	0.0115089	0.0122762	0.0130434	0.0138107	0.014578	0.0153452	0.0161125	0.0168797	0.017647	0.0184143	0.0191815	0.0199488	0.020716	0.0214833	0.0222506	0.0230178	0.0237851	0.0245523	0.0253196	0.0260869	0.0268541	0.0276214	0.0283886	0.0291559
Zebediela	Magmatic Sulfide	South Africa	-24.12	29.02	3960000	3.96	10.9469	21.7375	32.6843	0.00326843	0.0119952	0.0119952	0.0239903	0.0359855	0.0479806	0.0599758	0.0719709	0.0839661	0.0959612	0.107956	0.119952	0.131947	0.143942	0.155937	0.167932	0.179927	0.191922	0.203918	0.215913	0.227908	0.239903	0.251898	0.263893	0.275889	0.287884	0.299879	0.311874	0.323869	0.335864	0.347859	0.359855	0.37185	0.383845	0.39584	0.407835	0.41983	0.431826	0.443821	0.455816
Maturi	Magmatic Sulfide	USA	47.78	-91.7	3834000	3.834	39.3975	19.0912	58.4887	0.00584887	0.0214653	0.0214653	0.0429307	0.064396	0.0858614	0.107327	0.128792	0.150257	0.171723	0.193188	0.214653	0.236119	0.257584	0.279049	0.300515	0.32198	0.343445	0.364911	0.386376	0.407841	0.429307	0.450772	0.472238	0.493703	0.515168	0.536634	0.558099	0.579564	0.60103	0.622495	0.64396	0.665426	0.686891	0.708356	0.729822	0.751287	0.772752	0.794218	0.815683
Decar	Magmatic Sulfide	Canada	54.89	-125.35	3110854	3.11085	56.9143	20.2462	77.1606	0.00771606	0.0283179	0.0283179	0.0566358	0.0849538	0.113272	0.14159	0.169908	0.198225	0.226543	0.254861	0.283179	0.311497	0.339815	0.368133	0.396451	0.424769	0.453087	0.481405	0.509723	0.538041	0.566358	0.594676	0.622994	0.651312	0.67963	0.707948	0.736266	0.764584	0.792902	0.82122	0.849538	0.877856	0.906174	0.934491	0.962809	0.991127	1.01945	1.04776	1.07608
Mesaba	Magmatic Sulfide	USA	47.64	-91.89	2920000	2.92	33.536	13.5868	47.1228	0.00471228	0.0172941	0.0172941	0.0345881	0.0518822	0.0691763	0.0864703	0.103764	0.121058	0.138353	0.155647	0.172941	0.190235	0.207529	0.224823	0.242117	0.259411	0.276705	0.293999	0.311293	0.328587	0.345881	0.363175	0.380469	0.397763	0.415058	0.432352	0.449646	0.46694	0.484234	0.501528	0.518822	0.536116	0.55341	0.570704	0.587998	0.605292	0.622586	0.63988	0.657174
Project 81	Magmatic Sulfide	Canada	48.81	-81.21	2873000	2.873	31.2616	12.363	43.6246	0.00436246	0.0160102	0.0160102	0.0320205	0.0480307	0.0640409	0.0800511	0.0960614	0.112072	0.128082	0.144092	0.160102	0.176112	0.192123	0.208133	0.224143	0.240153	0.256164	0.272174	0.288184	0.304194	0.320205	0.336215	0.352225	0.368235	0.384245	0.400256	0.416266	0.432276	0.448286	0.464297	0.480307	0.496317	0.512327	0.528337	0.544348	0.560358	0.576368	0.592378	0.608389
Platreef	Magmatic Sulfide	South Africa	-24.09	28.98	2666214	2.66621	7.20822	13.22	20.4282	0.00204282	0.00749716	0.00749716	0.0149943	0.0224915	0.0299886	0.0374858	0.0449829	0.0524801	0.0599773	0.0674744	0.0749716	0.0824687	0.0899659	0.097463	0.10496	0.112457	0.119955	0.127452	0.134949	0.142446	0.149943	0.15744	0.164937	0.172435	0.179932	0.187429	0.194926	0.202423	0.20992	0.217418	0.224915	0.232412	0.239909	0.247406	0.254903	0.2624	0.269898	0.277395	0.284892
Yakabindie	Magmatic Sulfide	Australia	-27.45	120.57	2601400	2.6014	0.360123	1.53519	1.89531	0.000189531	0.000695578	0.000695578	0.00139116	0.00208673	0.00278231	0.00347789	0.00417347	0.00486905	0.00556463	0.0062602	0.00695578	0.00765136	0.00834694	0.00904252	0.0097381	0.0104337	0.0111293	0.0118248	0.0125204	0.013216	0.0139116	0.0146071	0.0153027	0.0159983	0.0166939	0.0173895	0.018085	0.0187806	0.0194762	0.0201718	0.0208673	0.0215629	0.0222585	0.0229541	0.0236497	0.0243452	0.0250408	0.0257364	0.026432
Weld Range	Magmatic Sulfide	Australia	-26.8	117.74	2505500	2.5055	0.614914	2.25098	2.86589	0.000286589	0.00105178	0.00105178	0.00210357	0.00315535	0.00420713	0.00525891	0.0063107	0.00736248	0.00841426	0.00946604	0.0105178	0.0115696	0.0126214	0.0136732	0.014725	0.0157767	0.0168285	0.0178803	0.0189321	0.0199839	0.0210357	0.0220874	0.0231392	0.024191	0.0252428	0.0262946	0.0273463	0.0283981	0.0294499	0.0305017	0.0315535	0.0326053	0.033657	0.0347088	0.0357606	0.0368124	0.0378642	0.038916	0.0399677
Kingash	Magmatic Sulfide	Russia	54.89	95.46	2369363	2.36936	61.3569	19.5437	80.9006	0.00809006	0.0296905	0.0296905	0.0593811	0.0890716	0.118762	0.148453	0.178143	0.207834	0.237524	0.267215	0.296905	0.326596	0.356286	0.385977	0.415667	0.445358	0.475048	0.504739	0.53443	0.56412	0.593811	0.623501	0.653192	0.682882	0.712573	0.742263	0.771954	0.801644	0.831335	0.861025	0.890716	0.920406	0.950097	0.979787	1.00948	1.03917	1.06886	1.09855	1.12824
Kabanga	Magmatic Sulfide	Tanzania	-2.88	30.54	1526000	1.526	15.5869	16.6899	32.2768	0.00322768	0.0118456	0.0118456	0.0236912	0.0355368	0.0473824	0.0592279	0.0710735	0.0829191	0.0947647	0.10661	0.118456	0.130301	0.142147	0.153993	0.165838	0.177684	0.189529	0.201375	0.213221	0.225066	0.236912	0.248757	0.260603	0.272449	0.284294	0.29614	0.307985	0.319831	0.331676	0.343522	0.355368	0.367213	0.379059	0.390904	0.40275	0.414596	0.426441	0.438287	0.450132
Carman Bay	Magmatic Sulfide	Canada	48.37	-81.01	1340000	1.34	52.2811	18.2114	70.4925	0.00704925	0.0258708	0.0258708	0.0517415	0.0776123	0.103483	0.129354	0.155225	0.181095	0.206966	0.232837	0.258708	0.284578	0.310449	0.33632	0.362191	0.388061	0.413932	0.439803	0.465674	0.491544	0.517415	0.543286	0.569157	0.595027	0.620898	0.646769	0.67264	0.69851	0.724381	0.750252	0.776123	0.801993	0.827864	0.853735	0.879606	0.905477	0.931347	0.957218	0.983089
Kun-Manie	Magmatic Sulfide	Russia	55.35	132.41	1215081	1.21508	24.1275	14.4735	38.601	0.0038601	0.0141666	0.0141666	0.0283331	0.0424997	0.0566662	0.0708328	0.0849994	0.0991659	0.113332	0.127499	0.141666	0.155832	0.169999	0.184165	0.198332	0.212498	0.226665	0.240832	0.254998	0.269165	0.283331	0.297498	0.311664	0.325831	0.339997	0.354164	0.368331	0.382497	0.396664	0.41083	0.424997	0.439163	0.45333	0.467496	0.481663	0.49583	0.509996	0.524163	0.538329
Ronnbacken	Magmatic Sulfide	Sweden	65.5	15.38	1206000	1.206	39.6725	15.9183	55.5908	0.00555908	0.0204018	0.0204018	0.0408037	0.0612055	0.0816074	0.102009	0.122411	0.142813	0.163215	0.183617	0.204018	0.22442	0.244822	0.265224	0.285626	0.306028	0.326429	0.346831	0.367233	0.387635	0.408037	0.428439	0.44884	0.469242	0.489644	0.510046	0.530448	0.55085	0.571251	0.591653	0.612055	0.632457	0.652859	0.673261	0.693663	0.714064	0.734466	0.754868	0.77527
West Musgrave	Magmatic Sulfide	Australia	-26.08	127.78	1190000	1.19	0.529963	2.2529	2.78286	0.000278286	0.00102131	0.00102131	0.00204262	0.00306393	0.00408524	0.00510655	0.00612786	0.00714917	0.00817048	0.00919179	0.0102131	0.0112344	0.0122557	0.013277	0.0142983	0.0153196	0.016341	0.0173623	0.0183836	0.0194049	0.0204262	0.0214475	0.0224688	0.0234901	0.0245114	0.0255327	0.0265541	0.0275754	0.0285967	0.029618	0.0306393	0.0316606	0.0326819	0.0337032	0.0347245	0.0357458	0.0367672	0.0377885	0.0388098
Nickel Shaw	Magmatic Sulfide	Canada	61.46	-139.53	1167999	1.168	9.65706	9.7908	19.4479	0.00194479	0.00713736	0.00713736	0.0142747	0.0214121	0.0285494	0.0356868	0.0428242	0.0499615	0.0570989	0.0642363	0.0713736	0.078511	0.0856483	0.0927857	0.0999231	0.10706	0.114198	0.121335	0.128473	0.13561	0.142747	0.149885	0.157022	0.164159	0.171297	0.178434	0.185571	0.192709	0.199846	0.206983	0.214121	0.221258	0.228396	0.235533	0.24267	0.249808	0.256945	0.264082	0.27122
Sheba's Ridge	Magmatic Sulfide	South Africa	-25.32	29.38	1150000	1.15	18.0747	31.6522	49.7269	0.00497269	0.0182498	0.0182498	0.0364995	0.0547493	0.0729991	0.0912488	0.109499	0.127748	0.145998	0.164248	0.182498	0.200747	0.218997	0.237247	0.255497	0.273746	0.291996	0.310246	0.328496	0.346746	0.364995	0.383245	0.401495	0.419745	0.437994	0.456244	0.474494	0.492744	0.510993	0.529243	0.547493	0.565743	0.583992	0.602242	0.620492	0.638742	0.656992	0.675241	0.693491
Souker	Magmatic Sulfide	Russia	69.42	30.52	894200	0.8942	2.05698	5.07775	7.13473	0.000713473	0.00261845	0.00261845	0.00523689	0.00785534	0.0104738	0.0130922	0.0157107	0.0183291	0.0209476	0.023566	0.0261845	0.0288029	0.0314214	0.0340398	0.0366583	0.0392767	0.0418952	0.0445136	0.0471321	0.0497505	0.0523689	0.0549874	0.0576058	0.0602243	0.0628427	0.0654612	0.0680796	0.0706981	0.0733165	0.075935	0.0785534	0.0811719	0.0837903	0.0864088	0.0890272	0.0916457	0.0942641	0.0968826	0.099501
Voronezh	Magmatic Sulfide	Russia	51.12	41.41	799500	0.7995	9.89276	6.50344	16.3962	0.00163962	0.0060174	0.0060174	0.0120348	0.0180522	0.0240696	0.030087	0.0361044	0.0421218	0.0481392	0.0541566	0.060174	0.0661914	0.0722088	0.0782263	0.0842437	0.0902611	0.0962785	0.102296	0.108313	0.114331	0.120348	0.126365	0.132383	0.1384	0.144418	0.150435	0.156453	0.16247	0.168487	0.174505	0.180522	0.18654	0.192557	0.198574	0.204592	0.210609	0.216627	0.222644	0.228661
NorthMet	Magmatic Sulfide	USA	47.61	-91.97	789250	0.78925	35.6974	13.8587	49.5561	0.00495561	0.0181871	0.0181871	0.0363742	0.0545613	0.0727483	0.0909354	0.109123	0.12731	0.145497	0.163684	0.181871	0.200058	0.218245	0.236432	0.254619	0.272806	0.290993	0.30918	0.327368	0.345555	0.363742	0.381929	0.400116	0.418303	0.43649	0.454677	0.472864	0.491051	0.509238	0.527425	0.545613	0.5638	0.581987	0.600174	0.618361	0.636548	0.654735	0.672922	0.691109
Maslovskoe	Magmatic Sulfide	Russia	69.23	88.07	712100	0.7121	0.657213	2.81702	3.47423	0.000347423	0.00127504	0.00127504	0.00255008	0.00382513	0.00510017	0.00637521	0.00765025	0.0089253	0.0102003	0.0114754	0.0127504	0.0140255	0.0153005	0.0165755	0.0178506	0.0191256	0.0204007	0.0216757	0.0229508	0.0242258	0.0255008	0.0267759	0.0280509	0.029326	0.030601	0.0318761	0.0331511	0.0344261	0.0357012	0.0369762	0.0382513	0.0395263	0.0408013	0.0420764	0.0433514	0.0446265	0.0459015	0.0471766	0.0484516
Chaya	Magmatic Sulfide	Russia	56.31	110.36	626000	0.626	15.235	11.6713	26.9063	0.00269063	0.00987463	0.00987463	0.0197493	0.0296239	0.0394985	0.0493731	0.0592478	0.0691224	0.078997	0.0888716	0.0987463	0.108621	0.118496	0.12837	0.138245	0.148119	0.157994	0.167869	0.177743	0.187618	0.197493	0.207367	0.217242	0.227116	0.236991	0.246866	0.25674	0.266615	0.27649	0.286364	0.296239	0.306113	0.315988	0.325863	0.335737	0.345612	0.355487	0.365361	0.375236
Cosmos	Magmatic Sulfide	Australia	-27.6	120.57	619174	0.619174	0.426049	1.7458	2.17185	0.000217185	0.00079707	0.00079707	0.00159414	0.00239121	0.00318828	0.00398535	0.00478242	0.00557949	0.00637656	0.00717363	0.0079707	0.00876777	0.00956484	0.0103619	0.011159	0.011956	0.0127531	0.0135502	0.0143473	0.0151443	0.0159414	0.0167385	0.0175355	0.0183326	0.0191297	0.0199267	0.0207238	0.0215209	0.0223179	0.023115	0.0239121	0.0247092	0.0255062	0.0263033	0.0271004	0.0278974	0.0286945	0.0294916	0.0302886
Waterberg	Magmatic Sulfide	South Africa	-23.37	28.9	542100	0.5421	15.8084	24.7494	40.5578	0.00405578	0.0148847	0.0148847	0.0297694	0.0446541	0.0595388	0.0744235	0.0893082	0.104193	0.119078	0.133962	0.148847	0.163732	0.178616	0.193501	0.208386	0.223271	0.238155	0.25304	0.267925	0.282809	0.297694	0.312579	0.327463	0.342348	0.357233	0.372118	0.387002	0.401887	0.416772	0.431656	0.446541	0.461426	0.476311	0.491195	0.50608	0.520965	0.535849	0.550734	0.565619
Jaguar	Magmatic Sulfide	Brazil	-6.49	-51.19	517500	0.5175	37.0544	9.53267	46.5871	0.00465871	0.0170975	0.0170975	0.0341949	0.0512924	0.0683898	0.0854873	0.102585	0.119682	0.13678	0.153877	0.170975	0.188072	0.20517	0.222267	0.239364	0.256462	0.273559	0.290657	0.307754	0.324852	0.341949	0.359047	0.376144	0.393242	0.410339	0.427436	0.444534	0.461631	0.478729	0.495826	0.512924	0.530021	0.547119	0.564216	0.581314	0.598411	0.615509	0.632606	0.649703
Eagle's Nest	Magmatic Sulfide	Canada	52.74	-86.3	487000	0.487	20.7022	12.4904	33.1926	0.00331926	0.0121817	0.0121817	0.0243634	0.0365451	0.0487268	0.0609085	0.0730902	0.0852719	0.0974536	0.109635	0.121817	0.133999	0.14618	0.158362	0.170544	0.182725	0.194907	0.207089	0.219271	0.231452	0.243634	0.255816	0.267997	0.280179	0.292361	0.304542	0.316724	0.328906	0.341087	0.353269	0.365451	0.377633	0.389814	0.401996	0.414178	0.426359	0.438541	0.450723	0.462904
Birch Lake	Magmatic Sulfide	USA	47.74	-91.8	471000	0.471	37.5023	14.922	52.4242	0.00524242	0.0192397	0.0192397	0.0384794	0.0577191	0.0769588	0.0961985	0.115438	0.134678	0.153918	0.173157	0.192397	0.211637	0.230876	0.250116	0.269356	0.288595	0.307835	0.327075	0.346315	0.365554	0.384794	0.404034	0.423273	0.442513	0.461753	0.480992	0.500232	0.519472	0.538712	0.557951	0.577191	0.596431	0.61567	0.63491	0.65415	0.673389	0.692629	0.711869	0.731109
Xiari Hamu	Magmatic Sulfide	China	36.49	93.36	440000	0.44	0.106708	0.574037	0.680745	6.80745e-05	0.000249834	0.000249834	0.000499667	0.000749501	0.000999334	0.00124917	0.001499	0.00174883	0.00199867	0.0022485	0.00249834	0.00274817	0.002998	0.00324784	0.00349767	0.0037475	0.00399734	0.00424717	0.004497	0.00474684	0.00499667	0.0052465	0.00549634	0.00574617	0.005996	0.00624584	0.00649567	0.00674551	0.00699534	0.00724517	0.00749501	0.00774484	0.00799467	0.00824451	0.00849434	0.00874417	0.00899401	0.00924384	0.00949367
Sakatti	Magmatic Sulfide	Finland	67.54	26.75	424000	0.424	22.1099	18.9671	41.077	0.0041077	0.0150753	0.0150753	0.0301505	0.0452258	0.0603011	0.0753763	0.0904516	0.105527	0.120602	0.135677	0.150753	0.165828	0.180903	0.195978	0.211054	0.226129	0.241204	0.256279	0.271355	0.28643	0.301505	0.316581	0.331656	0.346731	0.361806	0.376882	0.391957	0.407032	0.422107	0.437183	0.452258	0.467333	0.482408	0.497484	0.512559	0.527634	0.542709	0.557785	0.57286
Lesego	Magmatic Sulfide	South Africa	-24.38	29.74	420925	0.420925	23.055	39.5966	62.6515	0.00626515	0.0229931	0.0229931	0.0459862	0.0689793	0.0919725	0.114966	0.137959	0.160952	0.183945	0.206938	0.229931	0.252924	0.275917	0.29891	0.321904	0.344897	0.36789	0.390883	0.413876	0.436869	0.459862	0.482855	0.505848	0.528842	0.551835	0.574828	0.597821	0.620814	0.643807	0.6668	0.689793	0.712786	0.73578	0.758773	0.781766	0.804759	0.827752	0.850745	0.873738
Victoria	Magmatic Sulfide	Canada	46.41	-81.38	366423	0.366423	34.9532	15.0145	49.9677	0.00499677	0.0183381	0.0183381	0.0366763	0.0550144	0.0733526	0.0916907	0.110029	0.128367	0.146705	0.165043	0.183381	0.20172	0.220058	0.238396	0.256734	0.275072	0.29341	0.311748	0.330087	0.348425	0.366763	0.385101	0.403439	0.421777	0.440115	0.458454	0.476792	0.49513	0.513468	0.531806	0.550144	0.568482	0.58682	0.605159	0.623497	0.641835	0.660173	0.678511	0.696849
Ntaka Hill	Magmatic Sulfide	Tanzania	-10.1	38.54	356380	0.35638	23.2395	12.3845	35.624	0.0035624	0.013074	0.013074	0.026148	0.039222	0.052296	0.06537	0.078444	0.091518	0.104592	0.117666	0.13074	0.143814	0.156888	0.169962	0.183036	0.19611	0.209184	0.222258	0.235332	0.248406	0.26148	0.274554	0.287628	0.300702	0.313776	0.32685	0.339924	0.352998	0.366072	0.379146	0.39222	0.405294	0.418368	0.431442	0.444516	0.45759	0.470664	0.483738	0.496812
Selkirk	Magmatic Sulfide	Botswana	-21.31	27.72	315200	0.3152	15.4335	29.915	45.3485	0.00453485	0.0166429	0.0166429	0.0332858	0.0499287	0.0665715	0.0832144	0.0998573	0.1165	0.133143	0.149786	0.166429	0.183072	0.199715	0.216358	0.233	0.249643	0.266286	0.282929	0.299572	0.316215	0.332858	0.349501	0.366144	0.382786	0.399429	0.416072	0.432715	0.449358	0.466001	0.482644	0.499287	0.51593	0.532572	0.549215	0.565858	0.582501	0.599144	0.615787	0.63243
Chernogorskoye	Magmatic Sulfide	Russia	69.03	88.7	314600	0.3146	2.68802	10.5265	13.2146	0.00132146	0.00484975	0.00484975	0.00969949	0.0145492	0.019399	0.0242487	0.0290985	0.0339482	0.038798	0.0436477	0.0484975	0.0533472	0.058197	0.0630467	0.0678964	0.0727462	0.0775959	0.0824457	0.0872954	0.0921452	0.0969949	0.101845	0.106694	0.111544	0.116394	0.121244	0.126093	0.130943	0.135793	0.140643	0.145492	0.150342	0.155192	0.160042	0.164891	0.169741	0.174591	0.179441	0.18429
Ferguson Lake	Magmatic Sulfide	Canada	62.87	-96.83	303000	0.303	2.47741	9.98904	12.4664	0.00124664	0.00457519	0.00457519	0.00915037	0.0137256	0.0183007	0.0228759	0.0274511	0.0320263	0.0366015	0.0411767	0.0457519	0.050327	0.0549022	0.0594774	0.0640526	0.0686278	0.073203	0.0777782	0.0823533	0.0869285	0.0915037	0.0960789	0.100654	0.105229	0.109804	0.11438	0.118955	0.12353	0.128105	0.13268	0.137256	0.141831	0.146406	0.150981	0.155556	0.160131	0.164707	0.169282	0.173857
Kulymbinskaya	Magmatic Sulfide	Russia	68.08	89.11	297000	0.297	8.05362	7.0384	15.092	0.0015092	0.00553877	0.00553877	0.0110775	0.0166163	0.0221551	0.0276939	0.0332326	0.0387714	0.0443102	0.049849	0.0553877	0.0609265	0.0664653	0.072004	0.0775428	0.0830816	0.0886204	0.0941591	0.0996979	0.105237	0.110775	0.116314	0.121853	0.127392	0.132931	0.138469	0.144008	0.149547	0.155086	0.160624	0.166163	0.171702	0.177241	0.18278	0.188318	0.193857	0.199396	0.204935	0.210473
Jianchaling	Magmatic Sulfide	China	33.25	106.37	282000	0.282	22.7988	8.22975	31.0285	0.00310285	0.0113875	0.0113875	0.0227749	0.0341624	0.0455499	0.0569373	0.0683248	0.0797123	0.0910997	0.102487	0.113875	0.125262	0.13665	0.148037	0.159425	0.170812	0.182199	0.193587	0.204974	0.216362	0.227749	0.239137	0.250524	0.261912	0.273299	0.284687	0.296074	0.307462	0.318849	0.330237	0.341624	0.353011	0.364399	0.375786	0.387174	0.398561	0.409949	0.421336	0.432724
Kureisko-Gorbiachinskaya	Magmatic Sulfide	Russia	67.44	88.43	270000	0.27	2.75104	9.3562	12.1072	0.00121072	0.00444336	0.00444336	0.00888671	0.0133301	0.0177734	0.0222168	0.0266601	0.0311035	0.0355469	0.0399902	0.0444336	0.0488769	0.0533203	0.0577636	0.062207	0.0666504	0.0710937	0.0755371	0.0799804	0.0844238	0.0888671	0.0933105	0.0977538	0.102197	0.106641	0.111084	0.115527	0.119971	0.124414	0.128857	0.133301	0.137744	0.142187	0.146631	0.151074	0.155517	0.159961	0.164404	0.168848
Vuruchuaivench	Magmatic Sulfide	Russia	67.88	32.95	248200	0.2482	21.8834	15.0099	36.8933	0.00368933	0.0135398	0.0135398	0.0270797	0.0406195	0.0541594	0.0676992	0.0812391	0.0947789	0.108319	0.121859	0.135398	0.148938	0.162478	0.176018	0.189558	0.203098	0.216638	0.230177	0.243717	0.257257	0.270797	0.284337	0.297877	0.311416	0.324956	0.338496	0.352036	0.365576	0.379116	0.392655	0.406195	0.419735	0.433275	0.446815	0.460355	0.473895	0.487434	0.500974	0.514514
Victor Deep	Magmatic Sulfide	Canada	46.67	-80.81	244000	0.244	31.3756	13.7112	45.0868	0.00450868	0.0165469	0.0165469	0.0330937	0.0496406	0.0661874	0.0827343	0.0992811	0.115828	0.132375	0.148922	0.165469	0.182015	0.198562	0.215109	0.231656	0.248203	0.26475	0.281296	0.297843	0.31439	0.330937	0.347484	0.364031	0.380578	0.397124	0.413671	0.430218	0.446765	0.463312	0.479859	0.496406	0.512952	0.529499	0.546046	0.562593	0.57914	0.595687	0.612234	0.62878
Suyeke North	Magmatic Sulfide	China	45.15	83.52	216700	0.2167	0.429012	1.81704	2.24605	0.000224605	0.0008243	0.0008243	0.0016486	0.0024729	0.0032972	0.0041215	0.0049458	0.0057701	0.0065944	0.0074187	0.008243	0.0090673	0.0098916	0.0107159	0.0115402	0.0123645	0.0131888	0.0140131	0.0148374	0.0156617	0.016486	0.0173103	0.0181346	0.0189589	0.0197832	0.0206075	0.0214318	0.0222561	0.0230804	0.0239047	0.024729	0.0255533	0.0263776	0.0272019	0.0280262	0.0288505	0.0296748	0.0304991	0.0313234
Venus	Magmatic Sulfide	Australia	-27.78	120.69	203366	0.203366	0.352703	1.42969	1.7824	0.00017824	0.000654139	0.000654139	0.00130828	0.00196242	0.00261656	0.0032707	0.00392484	0.00457898	0.00523311	0.00588725	0.00654139	0.00719553	0.00784967	0.00850381	0.00915795	0.00981209	0.0104662	0.0111204	0.0117745	0.0124286	0.0130828	0.0137369	0.0143911	0.0150452	0.0156993	0.0163535	0.0170076	0.0176618	0.0183159	0.01897	0.0196242	0.0202783	0.0209325	0.0215866	0.0222407	0.0228949	0.023549	0.0242032	0.0248573
Hunters Road	Magmatic Sulfide	Zimbabwe	-19.15	29.77	200404	0.200404	19.7004	19.292	38.9923	0.00389923	0.0143102	0.0143102	0.0286204	0.0429306	0.0572408	0.071551	0.0858611	0.100171	0.114482	0.128792	0.143102	0.157412	0.171722	0.186032	0.200343	0.214653	0.228963	0.243273	0.257583	0.271894	0.286204	0.300514	0.314824	0.329134	0.343445	0.357755	0.372065	0.386375	0.400685	0.414996	0.429306	0.443616	0.457926	0.472236	0.486546	0.500857	0.515167	0.529477	0.543787
Suhanko Arctic Platinum	Magmatic Sulfide	Finland	66.26	26.28	198673	0.198673	31.5668	15.7124	47.2791	0.00472791	0.0173514	0.0173514	0.0347029	0.0520543	0.0694057	0.0867572	0.104109	0.12146	0.138811	0.156163	0.173514	0.190866	0.208217	0.225569	0.24292	0.260271	0.277623	0.294974	0.312326	0.329677	0.347029	0.36438	0.381732	0.399083	0.416434	0.433786	0.451137	0.468489	0.48584	0.503192	0.520543	0.537894	0.555246	0.572597	0.589949	0.6073	0.624652	0.642003	0.659354
Black Swan	Magmatic Sulfide	Australia	-30.39	121.64	195030	0.19503	2.91118	5.2754	8.18658	0.000818658	0.00300448	0.00300448	0.00600895	0.00901343	0.0120179	0.0150224	0.0180269	0.0210313	0.0240358	0.0270403	0.0300448	0.0330492	0.0360537	0.0390582	0.0420627	0.0450671	0.0480716	0.0510761	0.0540806	0.057085	0.0600895	0.063094	0.0660985	0.069103	0.0721074	0.0751119	0.0781164	0.0811209	0.0841253	0.0871298	0.0901343	0.0931388	0.0961432	0.0991477	0.102152	0.105157	0.108161	0.111166	0.11417
Jericho	Magmatic Sulfide	Australia	-27.05	120.44	180000	0.18	0.357457	1.5044	1.86186	0.000186186	0.000683302	0.000683302	0.0013666	0.00204991	0.00273321	0.00341651	0.00409981	0.00478311	0.00546642	0.00614972	0.00683302	0.00751632	0.00819962	0.00888293	0.00956623	0.0102495	0.0109328	0.0116161	0.0122994	0.0129827	0.013666	0.0143493	0.0150326	0.0157159	0.0163992	0.0170825	0.0177659	0.0184492	0.0191325	0.0198158	0.0204991	0.0211824	0.0218657	0.022549	0.0232323	0.0239156	0.0245989	0.0252822	0.0259655
Girilambone	Magmatic Sulfide	Australia	-31.51	147.05	179450	0.17945	2.63973	4.59059	7.23032	0.000723032	0.00265353	0.00265353	0.00530705	0.00796058	0.0106141	0.0132676	0.0159212	0.0185747	0.0212282	0.0238817	0.0265353	0.0291888	0.0318423	0.0344958	0.0371494	0.0398029	0.0424564	0.04511	0.0477635	0.050417	0.0530705	0.0557241	0.0583776	0.0610311	0.0636846	0.0663382	0.0689917	0.0716452	0.0742987	0.0769523	0.0796058	0.0822593	0.0849129	0.0875664	0.0902199	0.0928734	0.095527	0.0981805	0.100834
Nickel King	Magmatic Sulfide	Canada	60.24	-104.51	163463	0.163463	10.2182	9.33744	19.5556	0.00195556	0.00717691	0.00717691	0.0143538	0.0215307	0.0287076	0.0358845	0.0430614	0.0502384	0.0574153	0.0645922	0.0717691	0.078946	0.0861229	0.0932998	0.100477	0.107654	0.114831	0.122007	0.129184	0.136361	0.143538	0.150715	0.157892	0.165069	0.172246	0.179423	0.1866	0.193776	0.200953	0.20813	0.215307	0.222484	0.229661	0.236838	0.244015	0.251192	0.258369	0.265546	0.272722
Mphahlele's Location	Magmatic Sulfide	South Africa	-24.32	29.6	160000	0.16	13.0915	19.6567	32.7481	0.00327481	0.0120186	0.0120186	0.0240371	0.0360557	0.0480743	0.0600929	0.0721114	0.08413	0.0961486	0.108167	0.120186	0.132204	0.144223	0.156241	0.16826	0.180279	0.192297	0.204316	0.216334	0.228353	0.240371	0.25239	0.264409	0.276427	0.288446	0.300464	0.312483	0.324501	0.33652	0.348539	0.360557	0.372576	0.384594	0.396613	0.408631	0.42065	0.432669	0.444687	0.456706
Tamarack	Magmatic Sulfide	USA	46.67	-93.12	154000	0.154	21.193	16.2781	37.471	0.0037471	0.0137519	0.0137519	0.0275037	0.0412556	0.0550075	0.0687593	0.0825112	0.0962631	0.110015	0.123767	0.137519	0.151271	0.165022	0.178774	0.192526	0.206278	0.22003	0.233782	0.247534	0.261285	0.275037	0.288789	0.302541	0.316293	0.330045	0.343797	0.357549	0.3713	0.385052	0.398804	0.412556	0.426308	0.44006	0.453812	0.467563	0.481315	0.495067	0.508819	0.522571
Windarra	Magmatic Sulfide	Australia	-28.61	122.24	148500	0.1485	0.58792	2.3812	2.96912	0.000296912	0.00108967	0.00108967	0.00217933	0.003269	0.00435866	0.00544833	0.00653799	0.00762766	0.00871732	0.00980699	0.0108967	0.0119863	0.013076	0.0141657	0.0152553	0.016345	0.0174346	0.0185243	0.019614	0.0207036	0.0217933	0.022883	0.0239726	0.0250623	0.026152	0.0272416	0.0283313	0.029421	0.0305106	0.0316003	0.03269	0.0337796	0.0348693	0.035959	0.0370486	0.0381383	0.039228	0.0403176	0.0414073
Tjate	Magmatic Sulfide	South Africa	-24.5	29.98	148040	0.14804	22.5304	42.5625	65.0928	0.00650928	0.0238891	0.0238891	0.0477781	0.0716672	0.0955563	0.119445	0.143334	0.167224	0.191113	0.215002	0.238891	0.26278	0.286669	0.310558	0.334447	0.358336	0.382225	0.406114	0.430003	0.453892	0.477781	0.501671	0.52556	0.549449	0.573338	0.597227	0.621116	0.645005	0.668894	0.692783	0.716672	0.740561	0.76445	0.788339	0.812228	0.836118	0.860007	0.883896	0.907785
Mt Edwards	Magmatic Sulfide	Australia	-31.68	121.61	146881	0.146881	16.292	17.8517	34.1437	0.00341437	0.0125307	0.0125307	0.0250615	0.0375922	0.0501229	0.0626537	0.0751844	0.0877151	0.100246	0.112777	0.125307	0.137838	0.150369	0.1629	0.17543	0.187961	0.200492	0.213022	0.225553	0.238084	0.250615	0.263145	0.275676	0.288207	0.300738	0.313268	0.325799	0.33833	0.35086	0.363391	0.375922	0.388453	0.400983	0.413514	0.426045	0.438576	0.451106	0.463637	0.476168
Heishan	Magmatic Sulfide	China	41.81	97.03	135000	0.135	0.143719	0.60602	0.749739	7.49739e-05	0.000275154	0.000275154	0.000550308	0.000825462	0.00110062	0.00137577	0.00165092	0.00192608	0.00220123	0.00247639	0.00275154	0.0030267	0.00330185	0.003577	0.00385216	0.00412731	0.00440247	0.00467762	0.00495277	0.00522793	0.00550308	0.00577824	0.00605339	0.00632855	0.0066037	0.00687885	0.00715401	0.00742916	0.00770432	0.00797947	0.00825462	0.00852978	0.00880493	0.00908009	0.00935524	0.0096304	0.00990555	0.0101807	0.0104559
Pardoo-Highway	Magmatic Sulfide	Australia	-20.18	119.65	134100	0.1341	0.67037	2.64716	3.31753	0.000331753	0.00121753	0.00121753	0.00243507	0.0036526	0.00487014	0.00608767	0.0073052	0.00852274	0.00974027	0.0109578	0.0121753	0.0133929	0.0146104	0.0158279	0.0170455	0.018263	0.0194805	0.0206981	0.0219156	0.0231331	0.0243507	0.0255682	0.0267857	0.0280033	0.0292208	0.0304383	0.0316559	0.0328734	0.0340909	0.0353085	0.036526	0.0377435	0.0389611	0.0401786	0.0413962	0.0426137	0.0438312	0.0450488	0.0462663
Stillwater Complex	Magmatic Sulfide	USA	45.38	-109.86	129000	0.129	33.2422	13.7714	47.0136	0.00470136	0.017254	0.017254	0.034508	0.051762	0.069016	0.08627	0.103524	0.120778	0.138032	0.155286	0.17254	0.189794	0.207048	0.224302	0.241556	0.25881	0.276064	0.293318	0.310572	0.327826	0.34508	0.362334	0.379588	0.396842	0.414096	0.43135	0.448604	0.465858	0.483112	0.500366	0.51762	0.534874	0.552128	0.569382	0.586636	0.60389	0.621144	0.638398	0.655652
Norseman	Magmatic Sulfide	Australia	-32.09	121.64	122500	0.1225	38.9468	25.3159	64.2627	0.00642627	0.0235844	0.0235844	0.0471688	0.0707533	0.0943377	0.117922	0.141507	0.165091	0.188675	0.21226	0.235844	0.259429	0.283013	0.306597	0.330182	0.353766	0.377351	0.400935	0.42452	0.448104	0.471688	0.495273	0.518857	0.542442	0.566026	0.589611	0.613195	0.636779	0.660364	0.683948	0.707533	0.731117	0.754702	0.778286	0.80187	0.825455	0.849039	0.872624	0.896208
Grasvally	Magmatic Sulfide	South Africa	-24.32	28.97	119400	0.1194	13.8508	27.3391	41.1898	0.00411898	0.0151167	0.0151167	0.0302333	0.04535	0.0604667	0.0755833	0.0907	0.105817	0.120933	0.13605	0.151167	0.166283	0.1814	0.196517	0.211633	0.22675	0.241867	0.256983	0.2721	0.287217	0.302333	0.31745	0.332567	0.347683	0.3628	0.377917	0.393033	0.40815	0.423267	0.438383	0.4535	0.468617	0.483733	0.49885	0.513967	0.529083	0.5442	0.559317	0.574433
Samapleu	Magmatic Sulfide	Cote d'Ivoire	7.71	-7.91	119000	0.119	31.1323	12.8091	43.9414	0.00439414	0.0161265	0.0161265	0.032253	0.0483794	0.0645059	0.0806324	0.0967589	0.112885	0.129012	0.145138	0.161265	0.177391	0.193518	0.209644	0.225771	0.241897	0.258024	0.27415	0.290277	0.306403	0.32253	0.338656	0.354783	0.370909	0.387036	0.403162	0.419289	0.435415	0.451541	0.467668	0.483794	0.499921	0.516047	0.532174	0.5483	0.564427	0.580553	0.59668	0.612806
Aurora	Magmatic Sulfide	South Africa	-23.57	28.91	119000	0.119	4.01288	4.57301	8.58589	0.000858589	0.00315102	0.00315102	0.00630204	0.00945306	0.0126041	0.0157551	0.0189061	0.0220572	0.0252082	0.0283592	0.0315102	0.0346612	0.0378123	0.0409633	0.0441143	0.0472653	0.0504163	0.0535674	0.0567184	0.0598694	0.0630204	0.0661715	0.0693225	0.0724735	0.0756245	0.0787755	0.0819266	0.0850776	0.0882286	0.0913796	0.0945306	0.0976817	0.100833	0.103984	0.107135	0.110286	0.113437	0.116588	0.119739
Lynn Lake	Magmatic Sulfide	Canada	56.84	-101	116800	0.1168	18.0226	10.4163	28.4389	0.00284389	0.0104371	0.0104371	0.0208742	0.0313112	0.0417483	0.0521854	0.0626225	0.0730595	0.0834966	0.0939337	0.104371	0.114808	0.125245	0.135682	0.146119	0.156556	0.166993	0.17743	0.187867	0.198304	0.208742	0.219179	0.229616	0.240053	0.25049	0.260927	0.271364	0.281801	0.292238	0.302675	0.313112	0.323549	0.333986	0.344423	0.354861	0.365298	0.375735	0.386172	0.396609
Grey Dam	Magmatic Sulfide	Australia	-30.47	122.15	110000	0.11	0.870247	3.13457	4.00481	0.000400481	0.00146977	0.00146977	0.00293953	0.0044093	0.00587907	0.00734884	0.0088186	0.0102884	0.0117581	0.0132279	0.0146977	0.0161674	0.0176372	0.019107	0.0205767	0.0220465	0.0235163	0.024986	0.0264558	0.0279256	0.0293953	0.0308651	0.0323349	0.0338046	0.0352744	0.0367442	0.0382139	0.0396837	0.0411535	0.0426232	0.044093	0.0455628	0.0470325	0.0485023	0.0499721	0.0514418	0.0529116	0.0543814	0.0558511
Makwa Mayville	Magmatic Sulfide	Canada	50.62	-95.6	104000	0.104	36.3352	16.513	52.8482	0.00528482	0.0193953	0.0193953	0.0387906	0.0581859	0.0775812	0.0969765	0.116372	0.135767	0.155162	0.174558	0.193953	0.213348	0.232743	0.252139	0.271534	0.290929	0.310325	0.32972	0.349115	0.368511	0.387906	0.407301	0.426696	0.446092	0.465487	0.484882	0.504278	0.523673	0.543068	0.562463	0.581859	0.601254	0.620649	0.640045	0.65944	0.678835	0.69823	0.717626	0.737021
Sherlock Bay	Magmatic Sulfide	Australia	-20.81	117.54	99200	0.0992	0.556398	2.35801	2.91441	0.000291441	0.00106959	0.00106959	0.00213918	0.00320877	0.00427835	0.00534794	0.00641753	0.00748712	0.00855671	0.0096263	0.0106959	0.0117655	0.0128351	0.0139046	0.0149742	0.0160438	0.0171134	0.018183	0.0192526	0.0203222	0.0213918	0.0224614	0.0235309	0.0246005	0.0256701	0.0267397	0.0278093	0.0288789	0.0299485	0.0310181	0.0320877	0.0331572	0.0342268	0.0352964	0.036366	0.0374356	0.0385052	0.0395748	0.0406444
Rooderand	Magmatic Sulfide	South Africa	-25.33	26.91	98000	0.098	3.94098	9.49816	13.4391	0.00134391	0.00493216	0.00493216	0.00986433	0.0147965	0.0197287	0.0246608	0.029593	0.0345252	0.0394573	0.0443895	0.0493216	0.0542538	0.059186	0.0641181	0.0690503	0.0739825	0.0789146	0.0838468	0.088779	0.0937111	0.0986433	0.103575	0.108508	0.11344	0.118372	0.123304	0.128236	0.133168	0.138101	0.143033	0.147965	0.152897	0.157829	0.162761	0.167694	0.172626	0.177558	0.18249	0.187422
Kivijarvi	Magmatic Sulfide	Russia	62.35	31	88000	0.088	50.2036	18.2499	68.4536	0.00684536	0.0251225	0.0251225	0.0502449	0.0753674	0.10049	0.125612	0.150735	0.175857	0.20098	0.226102	0.251225	0.276347	0.30147	0.326592	0.351714	0.376837	0.401959	0.427082	0.452204	0.477327	0.502449	0.527572	0.552694	0.577817	0.602939	0.628061	0.653184	0.678306	0.703429	0.728551	0.753674	0.778796	0.803919	0.829041	0.854164	0.879286	0.904409	0.929531	0.954653
Golden Valley	Magmatic Sulfide	South Africa	-26	27.51	88000	0.088	7.80489	8.9055	16.7104	0.00167104	0.00613271	0.00613271	0.0122654	0.0183981	0.0245309	0.0306636	0.0367963	0.042929	0.0490617	0.0551944	0.0613271	0.0674598	0.0735926	0.0797253	0.085858	0.0919907	0.0981234	0.104256	0.110389	0.116522	0.122654	0.128787	0.13492	0.141052	0.147185	0.153318	0.159451	0.165583	0.171716	0.177849	0.183981	0.190114	0.196247	0.20238	0.208512	0.214645	0.220778	0.22691	0.233043
Duketon	Magmatic Sulfide	Australia	-27.62	122.01	87115	0.087115	0.672147	2.25951	2.93166	0.000293166	0.00107592	0.00107592	0.00215184	0.00322775	0.00430367	0.00537959	0.00645551	0.00753143	0.00860734	0.00968326	0.0107592	0.0118351	0.012911	0.0139869	0.0150629	0.0161388	0.0172147	0.0182906	0.0193665	0.0204424	0.0215184	0.0225943	0.0236702	0.0247461	0.025822	0.0268979	0.0279739	0.0290498	0.0301257	0.0312016	0.0322775	0.0333535	0.0344294	0.0355053	0.0365812	0.0376571	0.038733	0.039809	0.0408849
Thierry	Magmatic Sulfide	Canada	51.49	-90.34	86000	0.086	37.6519	14.3288	51.9807	0.00519807	0.0190769	0.0190769	0.0381538	0.0572308	0.0763077	0.0953846	0.114462	0.133538	0.152615	0.171692	0.190769	0.209846	0.228923	0.248	0.267077	0.286154	0.305231	0.324308	0.343385	0.362462	0.381538	0.400615	0.419692	0.438769	0.457846	0.476923	0.496	0.515077	0.534154	0.553231	0.572308	0.591385	0.610462	0.629538	0.648615	0.667692	0.686769	0.705846	0.724923
Lake Lovno	Magmatic Sulfide	Russia	67.85	30.56	85000	0.085	15.0492	11.4003	26.4495	0.00264495	0.00970695	0.00970695	0.0194139	0.0291208	0.0388278	0.0485347	0.0582417	0.0679486	0.0776556	0.0873625	0.0970695	0.106776	0.116483	0.12619	0.135897	0.145604	0.155311	0.165018	0.174725	0.184432	0.194139	0.203846	0.213553	0.22326	0.232967	0.242674	0.252381	0.262088	0.271795	0.281502	0.291208	0.300915	0.310622	0.320329	0.330036	0.339743	0.34945	0.359157	0.368864
Lovnozersky	Magmatic Sulfide	Russia	68.34	30.05	84900	0.0849	30.1323	15.5137	45.646	0.0045646	0.0167521	0.0167521	0.0335041	0.0502562	0.0670083	0.0837603	0.100512	0.117264	0.134017	0.150769	0.167521	0.184273	0.201025	0.217777	0.234529	0.251281	0.268033	0.284785	0.301537	0.318289	0.335041	0.351793	0.368546	0.385298	0.40205	0.418802	0.435554	0.452306	0.469058	0.48581	0.502562	0.519314	0.536066	0.552818	0.56957	0.586322	0.603074	0.619827	0.636579
Eerste Regt	Magmatic Sulfide	South Africa	-24.4	29.76	82000	0.082	20.1841	34.3289	54.513	0.0054513	0.0200063	0.0200063	0.0400125	0.0600188	0.080025	0.100031	0.120038	0.140044	0.16005	0.180056	0.200063	0.220069	0.240075	0.260081	0.280088	0.300094	0.3201	0.340106	0.360113	0.380119	0.400125	0.420131	0.440138	0.460144	0.48015	0.500156	0.520163	0.540169	0.560175	0.580181	0.600188	0.620194	0.6402	0.660206	0.680213	0.700219	0.720225	0.740231	0.760238
Lappvattnet	Magmatic Sulfide	Sweden	64.5	20.83	80331	0.080331	33.5532	14.4767	48.0299	0.00480299	0.017627	0.017627	0.0352539	0.0528809	0.0705079	0.0881348	0.105762	0.123389	0.141016	0.158643	0.17627	0.193897	0.211524	0.229151	0.246778	0.264405	0.282032	0.299658	0.317285	0.334912	0.352539	0.370166	0.387793	0.40542	0.423047	0.440674	0.458301	0.475928	0.493555	0.511182	0.528809	0.546436	0.564063	0.58169	0.599317	0.616944	0.634571	0.652198	0.669825
Fisher East	Magmatic Sulfide	Australia	-26.8	121.55	78000	0.078	0.544335	2.27328	2.81761	0.000281761	0.00103406	0.00103406	0.00206813	0.00310219	0.00413625	0.00517032	0.00620438	0.00723844	0.00827251	0.00930657	0.0103406	0.0113747	0.0124088	0.0134428	0.0144769	0.0155109	0.016545	0.0175791	0.0186131	0.0196472	0.0206813	0.0217153	0.0227494	0.0237835	0.0248175	0.0258516	0.0268856	0.0279197	0.0289538	0.0299878	0.0310219	0.032056	0.03309	0.0341241	0.0351581	0.0361922	0.0372263	0.0382603	0.0392944
Huangshan Nan	Magmatic Sulfide	China	42.9	93.5	73918	0.073918	1.2931	0.993842	2.28695	0.000228695	0.000839309	0.000839309	0.00167862	0.00251793	0.00335724	0.00419655	0.00503585	0.00587516	0.00671447	0.00755378	0.00839309	0.0092324	0.0100717	0.010911	0.0117503	0.0125896	0.0134289	0.0142683	0.0151076	0.0159469	0.0167862	0.0176255	0.0184648	0.0193041	0.0201434	0.0209827	0.021822	0.0226613	0.0235007	0.02434	0.0251793	0.0260186	0.0268579	0.0276972	0.0285365	0.0293758	0.0302151	0.0310544	0.0318937
Karikvavr-2	Magmatic Sulfide	Russia	46.33	-81.85	61008	0.061008	41.4451	15.4589	56.904	0.0056904	0.0208838	0.0208838	0.0417675	0.0626513	0.0835351	0.104419	0.125303	0.146186	0.16707	0.187954	0.208838	0.229721	0.250605	0.271489	0.292373	0.313257	0.33414	0.355024	0.375908	0.396792	0.417675	0.438559	0.459443	0.480327	0.50121	0.522094	0.542978	0.563862	0.584746	0.605629	0.626513	0.647397	0.668281	0.689164	0.710048	0.730932	0.751816	0.772699	0.793583
Shakespeare	Magmatic Sulfide	Canada	-12.99	130.99	59556	0.059556	19.4211	31.2909	50.712	0.0050712	0.0186113	0.0186113	0.0372226	0.055834	0.0744453	0.0930566	0.111668	0.130279	0.148891	0.167502	0.186113	0.204725	0.223336	0.241947	0.260559	0.27917	0.297781	0.316392	0.335004	0.353615	0.372226	0.390838	0.409449	0.42806	0.446672	0.465283	0.483894	0.502506	0.521117	0.539728	0.55834	0.576951	0.595562	0.614174	0.632785	0.651396	0.670008	0.688619	0.70723
War Springs	Magmatic Sulfide	South Africa	-24.22	29.04	59000	0.059	17.9812	33.533	51.5142	0.00515142	0.0189057	0.0189057	0.0378114	0.0567172	0.0756229	0.0945286	0.113434	0.13234	0.151246	0.170152	0.189057	0.207963	0.226869	0.245774	0.26468	0.283586	0.302492	0.321397	0.340303	0.359209	0.378114	0.39702	0.415926	0.434832	0.453737	0.472643	0.491549	0.510455	0.52936	0.548266	0.567172	0.586077	0.604983	0.623889	0.642795	0.6617	0.680606	0.699512	0.718417
Mokopane	Magmatic Sulfide	South Africa	-24.14	29.01	58000	0.058	10.2251	19.7826	30.0077	0.00300077	0.0110128	0.0110128	0.0220257	0.0330385	0.0440513	0.0550641	0.066077	0.0770898	0.0881026	0.0991154	0.110128	0.121141	0.132154	0.143167	0.15418	0.165192	0.176205	0.187218	0.198231	0.209244	0.220257	0.231269	0.242282	0.253295	0.264308	0.275321	0.286333	0.297346	0.308359	0.319372	0.330385	0.341398	0.35241	0.363423	0.374436	0.385449	0.396462	0.407475	0.418487
Boikgantsho	Magmatic Sulfide	South Africa	-23.9	28.86	57200	0.0572	4.86027	9.86993	14.7302	0.00147302	0.00540598	0.00540598	0.010812	0.0162179	0.0216239	0.0270299	0.0324359	0.0378419	0.0432479	0.0486538	0.0540598	0.0594658	0.0648718	0.0702778	0.0756837	0.0810897	0.0864957	0.0919017	0.0973077	0.102714	0.10812	0.113526	0.118932	0.124338	0.129744	0.13515	0.140556	0.145962	0.151367	0.156773	0.162179	0.167585	0.172991	0.178397	0.183803	0.189209	0.194615	0.200021	0.205427
Grasset	Magmatic Sulfide	Canada	49.96	-78.33	54983	0.054983	16.1342	10.8202	26.9544	0.00269544	0.00989227	0.00989227	0.0197845	0.0296768	0.0395691	0.0494614	0.0593536	0.0692459	0.0791382	0.0890305	0.0989227	0.108815	0.118707	0.1286	0.138492	0.148384	0.158276	0.168169	0.178061	0.187953	0.197845	0.207738	0.21763	0.227522	0.237415	0.247307	0.257199	0.267091	0.276984	0.286876	0.296768	0.30666	0.316553	0.326445	0.336337	0.34623	0.356122	0.366014	0.375906
Kenbridge	Magmatic Sulfide	Canada	49.48	-93.63	52889	0.052889	40.6056	14.7231	55.3286	0.00553286	0.0203056	0.0203056	0.0406112	0.0609168	0.0812224	0.101528	0.121834	0.142139	0.162445	0.182751	0.203056	0.223362	0.243667	0.263973	0.284279	0.304584	0.32489	0.345195	0.365501	0.385807	0.406112	0.426418	0.446723	0.467029	0.487335	0.50764	0.527946	0.548252	0.568557	0.588863	0.609168	0.629474	0.64978	0.670085	0.690391	0.710696	0.731002	0.751308	0.771613
Radio Hill	Magmatic Sulfide	Australia	-20.98	116.86	52045	0.052045	0.629939	2.67607	3.30601	0.000330601	0.00121331	0.00121331	0.00242661	0.00363992	0.00485323	0.00606653	0.00727984	0.00849315	0.00970645	0.0109198	0.0121331	0.0133464	0.0145597	0.015773	0.0169863	0.0181996	0.0194129	0.0206262	0.0218395	0.0230528	0.0242661	0.0254794	0.0266927	0.027906	0.0291194	0.0303327	0.031546	0.0327593	0.0339726	0.0351859	0.0363992	0.0376125	0.0388258	0.0400391	0.0412524	0.0424657	0.043679	0.0448923	0.0461056
Lake Johnston	Magmatic Sulfide	Australia	-32.19	120.48	52000	0.052	28.0205	20.9779	48.9984	0.00489984	0.0179824	0.0179824	0.0359648	0.0539472	0.0719297	0.0899121	0.107894	0.125877	0.143859	0.161842	0.179824	0.197807	0.215789	0.233771	0.251754	0.269736	0.287719	0.305701	0.323683	0.341666	0.359648	0.377631	0.395613	0.413596	0.431578	0.44956	0.467543	0.485525	0.503508	0.52149	0.539472	0.557455	0.575437	0.59342	0.611402	0.629385	0.647367	0.665349	0.683332
Lantinen Koillismaa	Magmatic Sulfide	Finland	65.94	28.17	51500	0.0515	23.3003	16.2359	39.5362	0.00395362	0.0145098	0.0145098	0.0290195	0.0435293	0.0580391	0.0725489	0.0870586	0.101568	0.116078	0.130588	0.145098	0.159607	0.174117	0.188627	0.203137	0.217647	0.232156	0.246666	0.261176	0.275686	0.290195	0.304705	0.319215	0.333725	0.348235	0.362744	0.377254	0.391764	0.406274	0.420783	0.435293	0.449803	0.464313	0.478822	0.493332	0.507842	0.522352	0.536862	0.551371
Bowden Lake	Magmatic Sulfide	Canada	54.91	-98.66	50194	0.050194	25.5198	12.1604	37.6802	0.00376802	0.0138286	0.0138286	0.0276573	0.0414859	0.0553145	0.0691431	0.0829718	0.0968004	0.110629	0.124458	0.138286	0.152115	0.165944	0.179772	0.193601	0.207429	0.221258	0.235087	0.248915	0.262744	0.276573	0.290401	0.30423	0.318058	0.331887	0.345716	0.359544	0.373373	0.387202	0.40103	0.414859	0.428687	0.442516	0.456345	0.470173	0.484002	0.497831	0.511659	0.525488
Leeuwkap	Magmatic Sulfide	South Africa	-25.62	27.6	50000	0.05	11.118	21.0504	32.1684	0.00321684	0.0118058	0.0118058	0.0236116	0.0354174	0.0472232	0.059029	0.0708348	0.0826406	0.0944464	0.106252	0.118058	0.129864	0.14167	0.153475	0.165281	0.177087	0.188893	0.200699	0.212504	0.22431	0.236116	0.247922	0.259728	0.271533	0.283339	0.295145	0.306951	0.318757	0.330562	0.342368	0.354174	0.36598	0.377786	0.389591	0.401397	0.413203	0.425009	0.436815	0.44862
Lavoie Lake	Magmatic Sulfide	Canada	52.47	-87.58	49000	0.049	24.9287	11.0957	36.0244	0.00360244	0.013221	0.013221	0.0264419	0.0396629	0.0528838	0.0661048	0.0793257	0.0925467	0.105768	0.118989	0.13221	0.14543	0.158651	0.171872	0.185093	0.198314	0.211535	0.224756	0.237977	0.251198	0.264419	0.27764	0.290861	0.304082	0.317303	0.330524	0.343745	0.356966	0.370187	0.383408	0.396629	0.409849	0.42307	0.436291	0.449512	0.462733	0.475954	0.489175	0.502396
Lansdowne House	Magmatic Sulfide	Canada	52.5	-87.51	49000	0.049	22.727	10.6089	33.3359	0.00333359	0.0122343	0.0122343	0.0244685	0.0367028	0.0489371	0.0611713	0.0734056	0.0856399	0.0978741	0.110108	0.122343	0.134577	0.146811	0.159045	0.17128	0.183514	0.195748	0.207983	0.220217	0.232451	0.244685	0.25692	0.269154	0.281388	0.293622	0.305857	0.318091	0.330325	0.342559	0.354794	0.367028	0.379262	0.391496	0.403731	0.415965	0.428199	0.440434	0.452668	0.464902
Shengligou	Magmatic Sulfide	China	31.31	101.7	49000	0.049	20.9742	9.51222	30.4864	0.00304864	0.0111885	0.0111885	0.022377	0.0335656	0.0447541	0.0559426	0.0671311	0.0783196	0.0895082	0.100697	0.111885	0.123074	0.134262	0.145451	0.156639	0.167828	0.179016	0.190205	0.201393	0.212582	0.22377	0.234959	0.246147	0.257336	0.268524	0.279713	0.290902	0.30209	0.313279	0.324467	0.335656	0.346844	0.358033	0.369221	0.38041	0.391598	0.402787	0.413975	0.425164
Thunder Bay North	Magmatic Sulfide	Canada	48.8	-88.96	48144	0.048144	45.3123	17.4332	62.7455	0.00627455	0.0230276	0.0230276	0.0460552	0.0690828	0.0921103	0.115138	0.138166	0.161193	0.184221	0.207248	0.230276	0.253303	0.276331	0.299359	0.322386	0.345414	0.368441	0.391469	0.414497	0.437524	0.460552	0.483579	0.506607	0.529634	0.552662	0.57569	0.598717	0.621745	0.644772	0.6678	0.690828	0.713855	0.736883	0.75991	0.782938	0.805966	0.828993	0.852021	0.875048
Blezard	Magmatic Sulfide	Canada	46.57	-80.97	48000	0.048	16.6456	10.9563	27.6019	0.00276019	0.0101299	0.0101299	0.0202598	0.0303897	0.0405196	0.0506495	0.0607794	0.0709093	0.0810392	0.0911691	0.101299	0.111429	0.121559	0.131689	0.141819	0.151949	0.162078	0.172208	0.182338	0.192468	0.202598	0.212728	0.222858	0.232988	0.243118	0.253248	0.263377	0.273507	0.283637	0.293767	0.303897	0.314027	0.324157	0.334287	0.344417	0.354547	0.364676	0.374806	0.384936
Longchangren	Magmatic Sulfide	China	42.76	129.19	47000	0.047	13.9077	4.59416	18.5019	0.00185019	0.00679018	0.00679018	0.0135804	0.0203706	0.0271607	0.0339509	0.0407411	0.0475313	0.0543215	0.0611117	0.0679018	0.074692	0.0814822	0.0882724	0.0950626	0.101853	0.108643	0.115433	0.122223	0.129013	0.135804	0.142594	0.149384	0.156174	0.162964	0.169755	0.176545	0.183335	0.190125	0.196915	0.203706	0.210496	0.217286	0.224076	0.230866	0.237656	0.244447	0.251237	0.258027
Bon Accord	Magmatic Sulfide	South Africa	-25.76	31.1	46900	0.0469	21.1733	29.5914	50.7648	0.00507648	0.0186307	0.0186307	0.0372614	0.055892	0.0745227	0.0931534	0.111784	0.130415	0.149045	0.167676	0.186307	0.204937	0.223568	0.242199	0.26083	0.27946	0.298091	0.316722	0.335352	0.353983	0.372614	0.391244	0.409875	0.428506	0.447136	0.465767	0.484398	0.503028	0.521659	0.54029	0.55892	0.577551	0.596182	0.614812	0.633443	0.652074	0.670704	0.689335	0.707966
Langmuir	Magmatic Sulfide	Canada	48.33	-81.03	46600	0.0466	48.8456	17.1384	65.984	0.0065984	0.0242161	0.0242161	0.0484322	0.0726484	0.0968645	0.121081	0.145297	0.169513	0.193729	0.217945	0.242161	0.266377	0.290593	0.31481	0.339026	0.363242	0.387458	0.411674	0.43589	0.460106	0.484322	0.508539	0.532755	0.556971	0.581187	0.605403	0.629619	0.653835	0.678051	0.702268	0.726484	0.7507	0.774916	0.799132	0.823348	0.847564	0.87178	0.895997	0.920213
Mel	Magmatic Sulfide	Canada	55.96	-97.8	46266	0.046266	16.722	11.6618	28.3838	0.00283838	0.0104169	0.0104169	0.0208337	0.0312506	0.0416674	0.0520843	0.0625011	0.072918	0.0833349	0.0937517	0.104169	0.114585	0.125002	0.135419	0.145836	0.156253	0.16667	0.177087	0.187503	0.19792	0.208337	0.218754	0.229171	0.239588	0.250005	0.260421	0.270838	0.281255	0.291672	0.302089	0.312506	0.322923	0.333339	0.343756	0.354173	0.36459	0.375007	0.385424	0.395841
Pardee	Magmatic Sulfide	Canada	48.07	-89.62	46000	0.046	34.7875	13.6914	48.4789	0.00484789	0.0177917	0.0177917	0.0355835	0.0533752	0.071167	0.0889587	0.10675	0.124542	0.142334	0.160126	0.177917	0.195709	0.213501	0.231293	0.249084	0.266876	0.284668	0.30246	0.320251	0.338043	0.355835	0.373627	0.391418	0.40921	0.427002	0.444794	0.462585	0.480377	0.498169	0.515961	0.533752	0.551544	0.569336	0.587128	0.604919	0.622711	0.640503	0.658295	0.676086
West Graham	Magmatic Sulfide	Canada	46.43	-81.3	46000	0.046	30.2375	14.0524	44.2899	0.00442899	0.0162544	0.0162544	0.0325088	0.0487632	0.0650176	0.081272	0.0975264	0.113781	0.130035	0.14629	0.162544	0.178798	0.195053	0.211307	0.227562	0.243816	0.26007	0.276325	0.292579	0.308834	0.325088	0.341342	0.357597	0.373851	0.390106	0.40636	0.422614	0.438869	0.455123	0.471378	0.487632	0.503886	0.520141	0.536395	0.55265	0.568904	0.585158	0.601413	0.617667
Kuhmo	Magmatic Sulfide	Finland	65.14	29.07	45732	0.045732	29.2203	14.201	43.4214	0.00434214	0.0159356	0.0159356	0.0318713	0.0478069	0.0637426	0.0796782	0.0956139	0.11155	0.127485	0.143421	0.159356	0.175292	0.191228	0.207163	0.223099	0.239035	0.25497	0.270906	0.286842	0.302777	0.318713	0.334649	0.350584	0.36652	0.382456	0.398391	0.414327	0.430262	0.446198	0.462134	0.478069	0.494005	0.509941	0.525876	0.541812	0.557748	0.573683	0.589619	0.605555
East Lake	Magmatic Sulfide	Canada	61.68	-73.92	43000	0.043	0.219676	0.88655	1.10623	0.000110623	0.000405985	0.000405985	0.00081197	0.00121796	0.00162394	0.00202993	0.00243591	0.0028419	0.00324788	0.00365387	0.00405985	0.00446584	0.00487182	0.00527781	0.00568379	0.00608978	0.00649576	0.00690175	0.00730773	0.00771372	0.0081197	0.00852569	0.00893167	0.00933766	0.00974364	0.0101496	0.0105556	0.0109616	0.0113676	0.0117736	0.0121796	0.0125855	0.0129915	0.0133975	0.0138035	0.0142095	0.0146155	0.0150215	0.0154274
Hawk Ridge	Magmatic Sulfide	Canada	59	-69.64	42295	0.042295	2.0696	6.76153	8.83112	0.000883112	0.00324102	0.00324102	0.00648204	0.00972307	0.0129641	0.0162051	0.0194461	0.0226872	0.0259282	0.0291692	0.0324102	0.0356512	0.0388923	0.0421333	0.0453743	0.0486153	0.0518564	0.0550974	0.0583384	0.0615794	0.0648204	0.0680615	0.0713025	0.0745435	0.0777845	0.0810256	0.0842666	0.0875076	0.0907486	0.0939897	0.0972307	0.100472	0.103713	0.106954	0.110195	0.113436	0.116677	0.119918	0.123159
North Kambalda	Magmatic Sulfide	Australia	-31.17	121.69	40500	0.0405	1.62663	3.22025	4.84687	0.000484687	0.0017788	0.0017788	0.0035576	0.00533641	0.00711521	0.00889401	0.0106728	0.0124516	0.0142304	0.0160092	0.017788	0.0195668	0.0213456	0.0231244	0.0249032	0.026682	0.0284608	0.0302396	0.0320184	0.0337972	0.035576	0.0373548	0.0391336	0.0409124	0.0426912	0.04447	0.0462488	0.0480276	0.0498064	0.0515852	0.0533641	0.0551429	0.0569217	0.0587005	0.0604793	0.0622581	0.0640369	0.0658157	0.0675945
Jacomynspan	Magmatic Sulfide	South Africa	-29.41	21.82	39480	0.03948	1.69362	4.45534	6.14896	0.000614896	0.00225667	0.00225667	0.00451333	0.00677	0.00902667	0.0112833	0.01354	0.0157967	0.0180533	0.02031	0.0225667	0.0248233	0.02708	0.0293367	0.0315933	0.03385	0.0361067	0.0383633	0.04062	0.0428767	0.0451333	0.04739	0.0496467	0.0519033	0.05416	0.0564167	0.0586733	0.06093	0.0631867	0.0654433	0.0677	0.0699567	0.0722134	0.07447	0.0767267	0.0789834	0.08124	0.0834967	0.0857534
Panton	Magmatic Sulfide	Australia	-17.79	127.81	38563	0.038563	0.764099	3.2036	3.9677	0.00039677	0.00145615	0.00145615	0.00291229	0.00436844	0.00582459	0.00728073	0.00873688	0.010193	0.0116492	0.0131053	0.0145615	0.0160176	0.0174738	0.0189299	0.0203861	0.0218422	0.0232983	0.0247545	0.0262106	0.0276668	0.0291229	0.0305791	0.0320352	0.0334914	0.0349475	0.0364037	0.0378598	0.039316	0.0407721	0.0422283	0.0436844	0.0451405	0.0465967	0.0480528	0.049509	0.0509651	0.0524213	0.0538774	0.0553336
Horden Lake	Magmatic Sulfide	Canada	50.94	-77.79	37000	0.037	17.8213	9.729	27.5503	0.00275503	0.0101109	0.0101109	0.0202219	0.0303328	0.0404438	0.0505547	0.0606657	0.0707766	0.0808876	0.0909985	0.101109	0.11122	0.121331	0.131442	0.141553	0.151664	0.161775	0.171886	0.181997	0.192108	0.202219	0.21233	0.222441	0.232552	0.242663	0.252774	0.262885	0.272996	0.283106	0.293217	0.303328	0.313439	0.32355	0.333661	0.343772	0.353883	0.363994	0.374105	0.384216
McBride	Magmatic Sulfide	Canada	44.87	-77.72	35561	0.035561	67.0009	20.8071	87.808	0.0087808	0.0322255	0.0322255	0.0644511	0.0966766	0.128902	0.161128	0.193353	0.225579	0.257804	0.29003	0.322255	0.354481	0.386706	0.418932	0.451157	0.483383	0.515608	0.547834	0.58006	0.612285	0.644511	0.676736	0.708962	0.741187	0.773413	0.805638	0.837864	0.870089	0.902315	0.93454	0.966766	0.998991	1.03122	1.06344	1.09567	1.12789	1.16012	1.19234	1.22457
Rooipoort	Magmatic Sulfide	South Africa	-24.32	28.97	34000	0.034	13.8508	27.3391	41.1898	0.00411898	0.0151167	0.0151167	0.0302333	0.04535	0.0604667	0.0755833	0.0907	0.105817	0.120933	0.13605	0.151167	0.166283	0.1814	0.196517	0.211633	0.22675	0.241867	0.256983	0.2721	0.287217	0.302333	0.31745	0.332567	0.347683	0.3628	0.377917	0.393033	0.40815	0.423267	0.438383	0.4535	0.468617	0.483733	0.49885	0.513967	0.529083	0.5442	0.559317	0.574433
Espedalen	Magmatic Sulfide	Norway	61.42	9.56	33500	0.0335	16.5595	8.0397	24.5992	0.00245992	0.0090279	0.0090279	0.0180558	0.0270837	0.0361116	0.0451395	0.0541674	0.0631953	0.0722232	0.0812511	0.090279	0.0993069	0.108335	0.117363	0.126391	0.135419	0.144446	0.153474	0.162502	0.17153	0.180558	0.189586	0.198614	0.207642	0.21667	0.225698	0.234725	0.243753	0.252781	0.261809	0.270837	0.279865	0.288893	0.297921	0.306949	0.315977	0.325005	0.334032	0.34306
Old Nick	Magmatic Sulfide	Canada	49.04	-119.08	33000	0.033	48.1211	19.045	67.1661	0.00671661	0.02465	0.02465	0.0492999	0.0739499	0.0985999	0.12325	0.1479	0.17255	0.1972	0.22185	0.2465	0.27115	0.2958	0.32045	0.3451	0.36975	0.3944	0.41905	0.443699	0.468349	0.492999	0.517649	0.542299	0.566949	0.591599	0.616249	0.640899	0.665549	0.690199	0.714849	0.739499	0.764149	0.788799	0.813449	0.838099	0.862749	0.887399	0.912049	0.936699
Bruvann	Magmatic Sulfide	Norway	68.23	16.91	33000	0.033	10.3569	6.70852	17.0654	0.00170654	0.006263	0.006263	0.012526	0.018789	0.025052	0.031315	0.037578	0.043841	0.050104	0.056367	0.06263	0.068893	0.075156	0.0814189	0.0876819	0.0939449	0.100208	0.106471	0.112734	0.118997	0.12526	0.131523	0.137786	0.144049	0.150312	0.156575	0.162838	0.169101	0.175364	0.181627	0.18789	0.194153	0.200416	0.206679	0.212942	0.219205	0.225468	0.231731	0.237994
Inkosi	Magmatic Sulfide	South Africa	-25.66	27.68	32000	0.032	10.8847	16.4164	27.3011	0.00273011	0.0100195	0.0100195	0.020039	0.0300585	0.040078	0.0500975	0.060117	0.0701365	0.080156	0.0901755	0.100195	0.110215	0.120234	0.130254	0.140273	0.150293	0.160312	0.170332	0.180351	0.190371	0.20039	0.21041	0.220429	0.230449	0.240468	0.250488	0.260507	0.270527	0.280546	0.290566	0.300585	0.310605	0.320624	0.330644	0.340663	0.350683	0.360702	0.370722	0.380741
Junior Lake	Magmatic Sulfide	Canada	50.38	-87.94	31809	0.031809	19.1343	12.108	31.2424	0.00312424	0.0114659	0.0114659	0.0229319	0.0343978	0.0458638	0.0573297	0.0687957	0.0802616	0.0917276	0.103194	0.114659	0.126125	0.137591	0.149057	0.160523	0.171989	0.183455	0.194921	0.206387	0.217853	0.229319	0.240785	0.252251	0.263717	0.275183	0.286649	0.298115	0.309581	0.321047	0.332513	0.343978	0.355444	0.36691	0.378376	0.389842	0.401308	0.412774	0.42424	0.435706
Golden Ridge	Magmatic Sulfide	Australia	-30.91	121.71	31010	0.03101	4.4005	7.23106	11.6316	0.00116316	0.00426878	0.00426878	0.00853756	0.0128063	0.0170751	0.0213439	0.0256127	0.0298815	0.0341502	0.038419	0.0426878	0.0469566	0.0512254	0.0554941	0.0597629	0.0640317	0.0683005	0.0725693	0.076838	0.0811068	0.0853756	0.0896444	0.0939132	0.0981819	0.102451	0.106719	0.110988	0.115257	0.119526	0.123795	0.128063	0.132332	0.136601	0.14087	0.145139	0.149407	0.153676	0.157945	0.162214
Monchetundra	Magmatic Sulfide	Russia	67.91	32.72	30410	0.03041	2.7265	4.29423	7.02074	0.000702074	0.00257661	0.00257661	0.00515322	0.00772983	0.0103064	0.0128831	0.0154597	0.0180363	0.0206129	0.0231895	0.0257661	0.0283427	0.0309193	0.0334959	0.0360725	0.0386492	0.0412258	0.0438024	0.046379	0.0489556	0.0515322	0.0541088	0.0566854	0.059262	0.0618386	0.0644153	0.0669919	0.0695685	0.0721451	0.0747217	0.0772983	0.0798749	0.0824515	0.0850281	0.0876047	0.0901814	0.092758	0.0953346	0.0979112
River Valley	Magmatic Sulfide	Canada	46.7	-80.27	30277	0.030277	43.3368	15.3481	58.6848	0.00586848	0.0215373	0.0215373	0.0430747	0.064612	0.0861493	0.107687	0.129224	0.150761	0.172299	0.193836	0.215373	0.236911	0.258448	0.279985	0.301523	0.32306	0.344597	0.366135	0.387672	0.409209	0.430747	0.452284	0.473821	0.495359	0.516896	0.538433	0.559971	0.581508	0.603045	0.624583	0.64612	0.667657	0.689195	0.710732	0.732269	0.753807	0.775344	0.796881	0.818419
Nisk	Magmatic Sulfide	Canada	51.7	-75.6	30030	0.03003	8.47591	8.77163	17.2475	0.00172475	0.00632985	0.00632985	0.0126597	0.0189895	0.0253194	0.0316492	0.0379791	0.0443089	0.0506388	0.0569686	0.0632985	0.0696283	0.0759582	0.082288	0.0886179	0.0949477	0.101278	0.107607	0.113937	0.120267	0.126597	0.132927	0.139257	0.145586	0.151916	0.158246	0.164576	0.170906	0.177236	0.183566	0.189895	0.196225	0.202555	0.208885	0.215215	0.221545	0.227874	0.234204	0.240534
Nemeiben Lake	Magmatic Sulfide	Canada	55.39	-105.36	30000	0.03	35.7672	14.4904	50.2575	0.00502575	0.0184445	0.0184445	0.036889	0.0553336	0.0737781	0.0922226	0.110667	0.129112	0.147556	0.166001	0.184445	0.20289	0.221334	0.239779	0.258223	0.276668	0.295112	0.313557	0.332001	0.350446	0.36889	0.387335	0.405779	0.424224	0.442668	0.461113	0.479558	0.498002	0.516447	0.534891	0.553336	0.57178	0.590225	0.608669	0.627114	0.645558	0.664003	0.682447	0.700892
Texmont	Magmatic Sulfide	Canada	48.16	-81.2	29000	0.029	35.0122	15.6607	50.6729	0.00506729	0.018597	0.018597	0.0371939	0.0557909	0.0743879	0.0929848	0.111582	0.130179	0.148776	0.167373	0.18597	0.204567	0.223164	0.241761	0.260358	0.278955	0.297552	0.316148	0.334745	0.353342	0.371939	0.390536	0.409133	0.42773	0.446327	0.464924	0.483521	0.502118	0.520715	0.539312	0.557909	0.576506	0.595103	0.6137	0.632297	0.650894	0.669491	0.688088	0.706685
Dikoloti	Magmatic Sulfide	Botswana	-22.1	27.73	28700	0.0287	19.8711	33.3738	53.2449	0.00532449	0.0195409	0.0195409	0.0390818	0.0586227	0.0781636	0.0977045	0.117245	0.136786	0.156327	0.175868	0.195409	0.21495	0.234491	0.254032	0.273572	0.293113	0.312654	0.332195	0.351736	0.371277	0.390818	0.410359	0.4299	0.449441	0.468981	0.488522	0.508063	0.527604	0.547145	0.566686	0.586227	0.605768	0.625309	0.644849	0.66439	0.683931	0.703472	0.723013	0.742554
H-989	Magmatic Sulfide	China	42.18	94.54	28640	0.02864	0.1	0.479655	0.579655	5.79655e-05	0.000212733	0.000212733	0.000425467	0.0006382	0.000850934	0.00106367	0.0012764	0.00148913	0.00170187	0.0019146	0.00212733	0.00234007	0.0025528	0.00276553	0.00297827	0.003191	0.00340374	0.00361647	0.0038292	0.00404194	0.00425467	0.0044674	0.00468014	0.00489287	0.0051056	0.00531834	0.00553107	0.0057438	0.00595654	0.00616927	0.006382	0.00659474	0.00680747	0.0070202	0.00723294	0.00744567	0.0076584	0.00787114	0.00808387
Hart	Magmatic Sulfide	Canada	48.3	-81.08	26100	0.0261	49.3485	16.3515	65.7	0.00657	0.0241119	0.0241119	0.0482238	0.0723357	0.0964476	0.12056	0.144671	0.168783	0.192895	0.217007	0.241119	0.265231	0.289343	0.313455	0.337567	0.361679	0.38579	0.409902	0.434014	0.458126	0.482238	0.50635	0.530462	0.554574	0.578686	0.602798	0.626909	0.651021	0.675133	0.699245	0.723357	0.747469	0.771581	0.795693	0.819805	0.843917	0.868028	0.89214	0.916252
Delta	Magmatic Sulfide	Canada	61.48	-74.48	25000	0.025	0.756067	2.98159	3.73766	0.000373766	0.00137172	0.00137172	0.00274344	0.00411516	0.00548688	0.0068586	0.00823032	0.00960204	0.0109738	0.0123455	0.0137172	0.0150889	0.0164606	0.0178324	0.0192041	0.0205758	0.0219475	0.0233192	0.024691	0.0260627	0.0274344	0.0288061	0.0301778	0.0315496	0.0329213	0.034293	0.0356647	0.0370364	0.0384082	0.0397799	0.0411516	0.0425233	0.043895	0.0452668	0.0466385	0.0480102	0.0493819	0.0507536	0.0521254
Alexo-Dundonald	Magmatic Sulfide	Canada	48.65	-80.8	23247	0.023247	49.1831	17.8887	67.0719	0.00670719	0.0246154	0.0246154	0.0492308	0.0738461	0.0984615	0.123077	0.147692	0.172308	0.196923	0.221538	0.246154	0.270769	0.295385	0.32	0.344615	0.369231	0.393846	0.418461	0.443077	0.467692	0.492308	0.516923	0.541538	0.566154	0.590769	0.615384	0.64	0.664615	0.689231	0.713846	0.738461	0.763077	0.787692	0.812307	0.836923	0.861538	0.886154	0.910769	0.935384
Hadbah	Magmatic Sulfide	Saudi Arabia	18.11	44.13	23000	0.023	0.202331	0.832393	1.03472	0.000103472	0.000379744	0.000379744	0.000759487	0.00113923	0.00151897	0.00189872	0.00227846	0.00265821	0.00303795	0.00341769	0.00379744	0.00417718	0.00455692	0.00493667	0.00531641	0.00569616	0.0060759	0.00645564	0.00683539	0.00721513	0.00759487	0.00797462	0.00835436	0.0087341	0.00911385	0.00949359	0.00987334	0.0102531	0.0106328	0.0110126	0.0113923	0.0117721	0.0121518	0.0125315	0.0129113	0.013291	0.0136708	0.0140505	0.0144303
Blue Lake	Magmatic Sulfide	Canada	55.22	-66.13	23000	0.023	4.33928	5.85997	10.1993	0.00101993	0.00374312	0.00374312	0.00748625	0.0112294	0.0149725	0.0187156	0.0224587	0.0262019	0.029945	0.0336881	0.0374312	0.0411744	0.0449175	0.0486606	0.0524037	0.0561469	0.05989	0.0636331	0.0673762	0.0711194	0.0748625	0.0786056	0.0823487	0.0860919	0.089835	0.0935781	0.0973212	0.101064	0.104807	0.108551	0.112294	0.116037	0.11978	0.123523	0.127266	0.131009	0.134752	0.138496	0.142239
Fond du Lac	Magmatic Sulfide	Canada	59.38	-105.93	22000	0.022	11.6548	8.48847	20.1433	0.00201433	0.00739259	0.00739259	0.0147852	0.0221778	0.0295703	0.0369629	0.0443555	0.0517481	0.0591407	0.0665333	0.0739259	0.0813184	0.088711	0.0961036	0.103496	0.110889	0.118281	0.125674	0.133067	0.140459	0.147852	0.155244	0.162637	0.170029	0.177422	0.184815	0.192207	0.1996	0.206992	0.214385	0.221778	0.22917	0.236563	0.243955	0.251348	0.25874	0.266133	0.273526	0.280918
Ertelien	Magmatic Sulfide	Norway	60.06	10.04	22000	0.022	49.3691	17.0106	66.3797	0.00663797	0.0243613	0.0243613	0.0487227	0.073084	0.0974454	0.121807	0.146168	0.170529	0.194891	0.219252	0.243613	0.267975	0.292336	0.316697	0.341059	0.36542	0.389781	0.414143	0.438504	0.462865	0.487227	0.511588	0.535949	0.560311	0.584672	0.609033	0.633395	0.657756	0.682118	0.706479	0.73084	0.755202	0.779563	0.803924	0.828286	0.852647	0.877008	0.90137	0.925731
Scotia	Magmatic Sulfide	Australia	-30.05	121.22	21400	0.0214	0.330375	1.37575	1.70613	0.000170613	0.000626148	0.000626148	0.0012523	0.00187844	0.00250459	0.00313074	0.00375689	0.00438304	0.00500918	0.00563533	0.00626148	0.00688763	0.00751377	0.00813992	0.00876607	0.00939222	0.0100184	0.0106445	0.0112707	0.0118968	0.012523	0.0131491	0.0137753	0.0144014	0.0150275	0.0156537	0.0162798	0.016906	0.0175321	0.0181583	0.0187844	0.0194106	0.0200367	0.0206629	0.021289	0.0219152	0.0225413	0.0231675	0.0237936
Munni Munni	Magmatic Sulfide	Australia	-21.11	116.82	21000	0.021	0.608957	2.56908	3.17804	0.000317804	0.00116634	0.00116634	0.00233268	0.00349902	0.00466536	0.0058317	0.00699804	0.00816438	0.00933072	0.0104971	0.0116634	0.0128297	0.0139961	0.0151624	0.0163288	0.0174951	0.0186614	0.0198278	0.0209941	0.0221605	0.0233268	0.0244931	0.0256595	0.0268258	0.0279921	0.0291585	0.0303248	0.0314912	0.0326575	0.0338238	0.0349902	0.0361565	0.0373229	0.0384892	0.0396555	0.0408219	0.0419882	0.0431546	0.0443209
Tuli	Magmatic Sulfide	Botswana	-23.07	27.83	21000	0.021	9.14895	19.1989	28.3478	0.00283478	0.0104037	0.0104037	0.0208073	0.031211	0.0416146	0.0520183	0.0624219	0.0728256	0.0832293	0.0936329	0.104037	0.11444	0.124844	0.135248	0.145651	0.156055	0.166459	0.176862	0.187266	0.19767	0.208073	0.218477	0.22888	0.239284	0.249688	0.260091	0.270495	0.280899	0.291302	0.301706	0.31211	0.322513	0.332917	0.343321	0.353724	0.364128	0.374532	0.384935	0.395339
Firebird	Magmatic Sulfide	Canada	59.33	-106.01	20400	0.0204	9.5741	7.83967	17.4138	0.00174138	0.00639085	0.00639085	0.0127817	0.0191726	0.0255634	0.0319543	0.0383451	0.044736	0.0511268	0.0575177	0.0639085	0.0702994	0.0766903	0.0830811	0.089472	0.0958628	0.102254	0.108645	0.115035	0.121426	0.127817	0.134208	0.140599	0.14699	0.153381	0.159771	0.166162	0.172553	0.178944	0.185335	0.191726	0.198116	0.204507	0.210898	0.217289	0.22368	0.230071	0.236462	0.242852
Imbasa	Magmatic Sulfide	South Africa	-25.6	27.67	20000	0.02	15.4464	23.0181	38.4646	0.00384646	0.0141165	0.0141165	0.028233	0.0423495	0.056466	0.0705825	0.084699	0.0988155	0.112932	0.127048	0.141165	0.155281	0.169398	0.183514	0.197631	0.211747	0.225864	0.23998	0.254097	0.268213	0.28233	0.296446	0.310563	0.324679	0.338796	0.352912	0.367029	0.381145	0.395262	0.409378	0.423495	0.437611	0.451728	0.465844	0.479961	0.494077	0.508194	0.52231	0.536427
Bluebush Line	Magmatic Sulfide	Australia	42.86	126.49	19000	0.019	9.97709	3.58253	13.5596	0.00135596	0.00497638	0.00497638	0.00995276	0.0149291	0.0199055	0.0248819	0.0298583	0.0348347	0.039811	0.0447874	0.0497638	0.0547402	0.0597166	0.0646929	0.0696693	0.0746457	0.0796221	0.0845985	0.0895749	0.0945512	0.0995276	0.104504	0.10948	0.114457	0.119433	0.12441	0.129386	0.134362	0.139339	0.144315	0.149291	0.154268	0.159244	0.164221	0.169197	0.174173	0.17915	0.184126	0.189102
Fujia	Magmatic Sulfide	China	56.84	59.88	18600	0.0186	26.7806	11.9662	38.7468	0.00387468	0.0142201	0.0142201	0.0284402	0.0426602	0.0568803	0.0711004	0.0853205	0.0995406	0.113761	0.127981	0.142201	0.156421	0.170641	0.184861	0.199081	0.213301	0.227521	0.241741	0.255961	0.270181	0.284402	0.298622	0.312842	0.327062	0.341282	0.355502	0.369722	0.383942	0.398162	0.412382	0.426602	0.440822	0.455043	0.469263	0.483483	0.497703	0.511923	0.526143	0.540363
Daling	Magmatic Sulfide	China	42.89	126.44	18600	0.0186	10.9484	4.54606	15.4945	0.00154945	0.00568648	0.00568648	0.011373	0.0170594	0.0227459	0.0284324	0.0341189	0.0398054	0.0454918	0.0511783	0.0568648	0.0625513	0.0682377	0.0739242	0.0796107	0.0852972	0.0909837	0.0966701	0.102357	0.108043	0.11373	0.119416	0.125103	0.130789	0.136475	0.142162	0.147848	0.153535	0.159221	0.164908	0.170594	0.176281	0.181967	0.187654	0.19334	0.199027	0.204713	0.2104	0.216086
Las Aguilas	Magmatic Sulfide	Argentina	-33.12	-66.12	18500	0.0185	4.56141	9.31578	13.8772	0.00138772	0.00509293	0.00509293	0.0101859	0.0152788	0.0203717	0.0254646	0.0305576	0.0356505	0.0407434	0.0458364	0.0509293	0.0560222	0.0611151	0.0662081	0.071301	0.0763939	0.0814869	0.0865798	0.0916727	0.0967656	0.101859	0.106951	0.112044	0.117137	0.12223	0.127323	0.132416	0.137509	0.142602	0.147695	0.152788	0.157881	0.162974	0.168067	0.17316	0.178252	0.183345	0.188438	0.193531
No. 20	Magmatic Sulfide	China	42.28	94.77	18090	0.01809	0.1	0.262389	0.362389	3.62389e-05	0.000132997	0.000132997	0.000265994	0.000398991	0.000531988	0.000664985	0.000797981	0.000930978	0.00106398	0.00119697	0.00132997	0.00146297	0.00159596	0.00172896	0.00186196	0.00199495	0.00212795	0.00226095	0.00239394	0.00252694	0.00265994	0.00279293	0.00292593	0.00305893	0.00319193	0.00332492	0.00345792	0.00359092	0.00372391	0.00385691	0.00398991	0.0041229	0.0042559	0.0043889	0.00452189	0.00465489	0.00478789	0.00492089	0.00505388
Ravensthorpe East	Magmatic Sulfide	Australia	-33.34	119.97	18000	0.018	4.60282	1.93043	6.53325	0.000653325	0.0023977	0.0023977	0.00479541	0.00719311	0.00959081	0.0119885	0.0143862	0.0167839	0.0191816	0.0215793	0.023977	0.0263747	0.0287724	0.0311701	0.0335678	0.0359655	0.0383633	0.040761	0.0431587	0.0455564	0.0479541	0.0503518	0.0527495	0.0551472	0.0575449	0.0599426	0.0623403	0.064738	0.0671357	0.0695334	0.0719311	0.0743288	0.0767265	0.0791242	0.0815219	0.0839196	0.0863173	0.088715	0.0911127
Bird River	Magmatic Sulfide	Canada	50.48	-95.5	17841	0.017841	30.9143	16.138	47.0523	0.00470523	0.0172682	0.0172682	0.0345364	0.0518046	0.0690728	0.0863411	0.103609	0.120877	0.138146	0.155414	0.172682	0.18995	0.207219	0.224487	0.241755	0.259023	0.276291	0.29356	0.310828	0.328096	0.345364	0.362632	0.379901	0.397169	0.414437	0.431705	0.448973	0.466242	0.48351	0.500778	0.518046	0.535315	0.552583	0.569851	0.587119	0.604387	0.621656	0.638924	0.656192
Shining Tree	Magmatic Sulfide	Canada	47.56	-81.18	17200	0.0172	36.9696	14.8099	51.7795	0.00517795	0.0190031	0.0190031	0.0380061	0.0570092	0.0760123	0.0950153	0.114018	0.133021	0.152025	0.171028	0.190031	0.209034	0.228037	0.24704	0.266043	0.285046	0.304049	0.323052	0.342055	0.361058	0.380061	0.399064	0.418068	0.437071	0.456074	0.475077	0.49408	0.513083	0.532086	0.551089	0.570092	0.589095	0.608098	0.627101	0.646104	0.665107	0.68411	0.703114	0.722117
Magogaphate	Magmatic Sulfide	Botswana	-21.65	28.3	17136	0.017136	15.373	29.7974	45.1704	0.00451704	0.0165776	0.0165776	0.0331551	0.0497327	0.0663102	0.0828878	0.0994653	0.116043	0.13262	0.149198	0.165776	0.182353	0.198931	0.215508	0.232086	0.248663	0.265241	0.281818	0.298396	0.314974	0.331551	0.348129	0.364706	0.381284	0.397861	0.414439	0.431016	0.447594	0.464171	0.480749	0.497327	0.513904	0.530482	0.547059	0.563637	0.580214	0.596792	0.613369	0.629947
Norton	Magmatic Sulfide	Canada	51.9	-87.42	16311	0.016311	18.4257	10.4342	28.8599	0.00288599	0.0105916	0.0105916	0.0211832	0.0317747	0.0423663	0.0529579	0.0635495	0.0741411	0.0847327	0.0953242	0.105916	0.116507	0.127099	0.137691	0.148282	0.158874	0.169465	0.180057	0.190648	0.20124	0.211832	0.222423	0.233015	0.243606	0.254198	0.26479	0.275381	0.285973	0.296564	0.307156	0.317747	0.328339	0.338931	0.349522	0.360114	0.370705	0.381297	0.391889	0.40248
Sinclair	Magmatic Sulfide	Australia	-28.37	120.86	16200	0.0162	0.493497	2.07337	2.56687	0.000256687	0.000942042	0.000942042	0.00188408	0.00282613	0.00376817	0.00471021	0.00565225	0.00659429	0.00753633	0.00847838	0.00942042	0.0103625	0.0113045	0.0122465	0.0131886	0.0141306	0.0150727	0.0160147	0.0169568	0.0178988	0.0188408	0.0197829	0.0207249	0.021667	0.022609	0.023551	0.0244931	0.0254351	0.0263772	0.0273192	0.0282613	0.0292033	0.0301453	0.0310874	0.0320294	0.0329715	0.0339135	0.0348555	0.0357976
Labrador Trough	Magmatic Sulfide	Canada	58.08	-69.83	15000	0.015	4.83419	7.93985	12.774	0.0012774	0.00468807	0.00468807	0.00937614	0.0140642	0.0187523	0.0234404	0.0281284	0.0328165	0.0375046	0.0421926	0.0468807	0.0515688	0.0562569	0.0609449	0.065633	0.0703211	0.0750091	0.0796972	0.0843853	0.0890734	0.0937614	0.0984495	0.103138	0.107826	0.112514	0.117202	0.12189	0.126578	0.131266	0.135954	0.140642	0.14533	0.150018	0.154706	0.159394	0.164082	0.168771	0.173459	0.178147
Goodyear	Magmatic Sulfide	Australia	-31	121.68	15000	0.015	2.92321	5.30827	8.23148	0.000823148	0.00302095	0.00302095	0.00604191	0.00906286	0.0120838	0.0151048	0.0181257	0.0211467	0.0241676	0.0271886	0.0302095	0.0332305	0.0362514	0.0392724	0.0422934	0.0453143	0.0483353	0.0513562	0.0543772	0.0573981	0.0604191	0.06344	0.066461	0.0694819	0.0725029	0.0755238	0.0785448	0.0815657	0.0845867	0.0876077	0.0906286	0.0936496	0.0966705	0.0996915	0.102712	0.105733	0.108754	0.111775	0.114796
New Morning	Magmatic Sulfide	Australia	-32.45	119.68	15000	0.015	31.1983	22.4447	53.643	0.0053643	0.019687	0.019687	0.0393739	0.0590609	0.0787479	0.0984348	0.118122	0.137809	0.157496	0.177183	0.19687	0.216557	0.236244	0.255931	0.275618	0.295305	0.314991	0.334678	0.354365	0.374052	0.393739	0.413426	0.433113	0.4528	0.472487	0.492174	0.511861	0.531548	0.551235	0.570922	0.590609	0.610296	0.629983	0.64967	0.669357	0.689044	0.708731	0.728418	0.748105
Premiere Ridge	Magmatic Sulfide	Canada	46.71	-81.16	15000	0.015	36.013	14.6268	50.6397	0.00506397	0.0185848	0.0185848	0.0371696	0.0557544	0.0743392	0.0929239	0.111509	0.130094	0.148678	0.167263	0.185848	0.204433	0.223017	0.241602	0.260187	0.278772	0.297357	0.315941	0.334526	0.353111	0.371696	0.390281	0.408865	0.42745	0.446035	0.46462	0.483204	0.501789	0.520374	0.538959	0.557544	0.576128	0.594713	0.613298	0.631883	0.650468	0.669052	0.687637	0.706222
Shebandowan	Magmatic Sulfide	Canada	48.6	-90.28	13900	0.0139	37.0373	14.4997	51.537	0.0051537	0.0189141	0.0189141	0.0378282	0.0567423	0.0756564	0.0945705	0.113485	0.132399	0.151313	0.170227	0.189141	0.208055	0.226969	0.245883	0.264797	0.283711	0.302626	0.32154	0.340454	0.359368	0.378282	0.397196	0.41611	0.435024	0.453938	0.472852	0.491767	0.510681	0.529595	0.548509	0.567423	0.586337	0.605251	0.624165	0.643079	0.661993	0.680907	0.699822	0.718736
Hautalampi	Magmatic Sulfide	Finland	62.71	28.97	13600	0.0136	40.1069	16.1409	56.2478	0.00562478	0.0206429	0.0206429	0.0412859	0.0619288	0.0825717	0.103215	0.123858	0.144501	0.165143	0.185786	0.206429	0.227072	0.247715	0.268358	0.289001	0.309644	0.330287	0.35093	0.371573	0.392216	0.412859	0.433502	0.454145	0.474787	0.49543	0.516073	0.536716	0.557359	0.578002	0.598645	0.619288	0.639931	0.660574	0.681217	0.70186	0.722503	0.743146	0.763788	0.784431
Nepean	Magmatic Sulfide	Australia	-31.16	121.08	13250	0.01325	12.1802	16.9869	29.1671	0.00291671	0.0107043	0.0107043	0.0214087	0.032113	0.0428173	0.0535217	0.064226	0.0749303	0.0856347	0.096339	0.107043	0.117748	0.128452	0.139156	0.149861	0.160565	0.171269	0.181974	0.192678	0.203382	0.214087	0.224791	0.235495	0.2462	0.256904	0.267608	0.278313	0.289017	0.299721	0.310426	0.32113	0.331834	0.342539	0.353243	0.363947	0.374652	0.385356	0.39606	0.406765
Gochager Lake	Magmatic Sulfide	Canada	55.79	-104.96	13010	0.01301	27.5369	12.0916	39.6285	0.00396285	0.0145437	0.0145437	0.0290873	0.043631	0.0581747	0.0727183	0.087262	0.101806	0.116349	0.130893	0.145437	0.15998	0.174524	0.189068	0.203611	0.218155	0.232699	0.247242	0.261786	0.27633	0.290873	0.305417	0.319961	0.334504	0.349048	0.363592	0.378135	0.392679	0.407223	0.421766	0.43631	0.450854	0.465397	0.479941	0.494485	0.509028	0.523572	0.538116	0.552659
Kotalahti Production Centre	Magmatic Sulfide	Finland	63.02	28.82	11856	0.011856	42.7524	16.1101	58.8625	0.00588625	0.0216025	0.0216025	0.0432051	0.0648076	0.0864102	0.108013	0.129615	0.151218	0.17282	0.194423	0.216025	0.237628	0.25923	0.280833	0.302436	0.324038	0.345641	0.367243	0.388846	0.410448	0.432051	0.453653	0.475256	0.496858	0.518461	0.540063	0.561666	0.583269	0.604871	0.626474	0.648076	0.669679	0.691281	0.712884	0.734486	0.756089	0.777691	0.799294	0.820896
Lac Rocher	Magmatic Sulfide	Canada	50.58	-76.34	11760	0.01176	22.818	11.2938	34.1118	0.00341118	0.012519	0.012519	0.025038	0.0375571	0.0500761	0.0625951	0.0751141	0.0876331	0.100152	0.112671	0.12519	0.137709	0.150228	0.162747	0.175266	0.187785	0.200304	0.212823	0.225342	0.237861	0.25038	0.262899	0.275418	0.287937	0.300456	0.312976	0.325495	0.338014	0.350533	0.363052	0.375571	0.38809	0.400609	0.413128	0.425647	0.438166	0.450685	0.463204	0.475723
Poissons Blancs	Magmatic Sulfide	Canada	49.33	-72.17	11102	0.011102	41.8659	15.7581	57.624	0.0057624	0.021148	0.021148	0.042296	0.063444	0.084592	0.10574	0.126888	0.148036	0.169184	0.190332	0.21148	0.232628	0.253776	0.274924	0.296072	0.31722	0.338368	0.359516	0.380664	0.401812	0.42296	0.444108	0.465256	0.486404	0.507552	0.5287	0.549848	0.570996	0.592144	0.613292	0.63444	0.655588	0.676736	0.697884	0.719032	0.74018	0.761328	0.782476	0.803624
Nicobi	Magmatic Sulfide	Canada	49.32	-75.97	11000	0.011	36.8552	14.6464	51.5016	0.00515016	0.0189011	0.0189011	0.0378021	0.0567032	0.0756043	0.0945054	0.113406	0.132308	0.151209	0.17011	0.189011	0.207912	0.226813	0.245714	0.264615	0.283516	0.302417	0.321318	0.340219	0.35912	0.378021	0.396923	0.415824	0.434725	0.453626	0.472527	0.491428	0.510329	0.52923	0.548131	0.567032	0.585933	0.604834	0.623735	0.642636	0.661538	0.680439	0.69934	0.718241
Mareesburg 8 JT	Magmatic Sulfide	South Africa	-25.03	30.13	11000	0.011	19.7239	37.4782	57.2021	0.00572021	0.0209932	0.0209932	0.0419864	0.0629795	0.0839727	0.104966	0.125959	0.146952	0.167945	0.188939	0.209932	0.230925	0.251918	0.272911	0.293904	0.314898	0.335891	0.356884	0.377877	0.39887	0.419864	0.440857	0.46185	0.482843	0.503836	0.524829	0.545823	0.566816	0.587809	0.608802	0.629795	0.650788	0.671782	0.692775	0.713768	0.734761	0.755754	0.776748	0.797741
Norpax	Magmatic Sulfide	Canada	50.46	-95.01	11000	0.011	42.3515	15.1135	57.465	0.0057465	0.0210897	0.0210897	0.0421793	0.063269	0.0843587	0.105448	0.126538	0.147628	0.168717	0.189807	0.210897	0.231986	0.253076	0.274166	0.295255	0.316345	0.337435	0.358524	0.379614	0.400704	0.421793	0.442883	0.463973	0.485062	0.506152	0.527242	0.548331	0.569421	0.590511	0.6116	0.63269	0.65378	0.674869	0.695959	0.717049	0.738138	0.759228	0.780318	0.801407
Lake Aulneau	Magmatic Sulfide	Canada	56.97	-68.56	10870	0.01087	14.1867	11.6749	25.8616	0.00258616	0.00949122	0.00949122	0.0189824	0.0284737	0.0379649	0.0474561	0.0569473	0.0664385	0.0759297	0.085421	0.0949122	0.104403	0.113895	0.123386	0.132877	0.142368	0.151859	0.161351	0.170842	0.180333	0.189824	0.199316	0.208807	0.218298	0.227789	0.23728	0.246772	0.256263	0.265754	0.275245	0.284737	0.294228	0.303719	0.31321	0.322701	0.332193	0.341684	0.351175	0.360666
Lainejaur	Magmatic Sulfide	Sweden	65.24	18.98	10100	0.0101	35.2207	17.6045	52.8252	0.00528252	0.0193868	0.0193868	0.0387737	0.0581605	0.0775473	0.0969342	0.116321	0.135708	0.155095	0.174481	0.193868	0.213255	0.232642	0.252029	0.271416	0.290802	0.310189	0.329576	0.348963	0.36835	0.387737	0.407123	0.42651	0.445897	0.465284	0.484671	0.504058	0.523444	0.542831	0.562218	0.581605	0.600992	0.620379	0.639765	0.659152	0.678539	0.697926	0.717313	0.7367
Sahakoski	Magmatic Sulfide	Finland	61.64	21.69	10000	0.01	42.0932	16.147	58.2401	0.00582401	0.0213741	0.0213741	0.0427483	0.0641224	0.0854965	0.106871	0.128245	0.149619	0.170993	0.192367	0.213741	0.235115	0.25649	0.277864	0.299238	0.320612	0.341986	0.36336	0.384734	0.406108	0.427483	0.448857	0.470231	0.491605	0.512979	0.534353	0.555727	0.577101	0.598476	0.61985	0.641224	0.662598	0.683972	0.705346	0.72672	0.748094	0.769469	0.790843	0.812217
Xinsheng Mining	Magmatic Sulfide	China	23.6	101.96	10000	0.01	14.6984	6.16015	20.8586	0.00208586	0.00765509	0.00765509	0.0153102	0.0229653	0.0306204	0.0382755	0.0459305	0.0535856	0.0612407	0.0688958	0.0765509	0.084206	0.0918611	0.0995162	0.107171	0.114826	0.122481	0.130137	0.137792	0.145447	0.153102	0.160757	0.168412	0.176067	0.183722	0.191377	0.199032	0.206687	0.214343	0.221998	0.229653	0.237308	0.244963	0.252618	0.260273	0.267928	0.275583	0.283238	0.290893
Gabanintha	Magmatic Sulfide	Australia	-26.93	118.64	9500	0.0095	0.386503	1.64233	2.02883	0.000202883	0.000744582	0.000744582	0.00148916	0.00223375	0.00297833	0.00372291	0.00446749	0.00521208	0.00595666	0.00670124	0.00744582	0.0081904	0.00893499	0.00967957	0.0104242	0.0111687	0.0119133	0.0126579	0.0134025	0.0141471	0.0148916	0.0156362	0.0163808	0.0171254	0.01787	0.0186146	0.0193591	0.0201037	0.0208483	0.0215929	0.0223375	0.023082	0.0238266	0.0245712	0.0253158	0.0260604	0.026805	0.0275495	0.0282941
Collurabbie Hills	Magmatic Sulfide	Australia	-26.82	122.18	9314	0.009314	0.54365	2.24957	2.79322	0.000279322	0.00102511	0.00102511	0.00205022	0.00307533	0.00410044	0.00512556	0.00615067	0.00717578	0.00820089	0.009226	0.0102511	0.0112762	0.0123013	0.0133264	0.0143516	0.0153767	0.0164018	0.0174269	0.018452	0.0194771	0.0205022	0.0215273	0.0225524	0.0235776	0.0246027	0.0256278	0.0266529	0.027678	0.0287031	0.0297282	0.0307533	0.0317784	0.0328036	0.0338287	0.0348538	0.0358789	0.036904	0.0379291	0.0389542
Carr Boyd	Magmatic Sulfide	Australia	-30.05	121.63	8600	0.0086	3.05037	5.60864	8.65901	0.000865901	0.00317786	0.00317786	0.00635572	0.00953357	0.0127114	0.0158893	0.0190671	0.022245	0.0254229	0.0286007	0.0317786	0.0349564	0.0381343	0.0413121	0.04449	0.0476679	0.0508457	0.0540236	0.0572014	0.0603793	0.0635572	0.066735	0.0699129	0.0730907	0.0762686	0.0794464	0.0826243	0.0858022	0.08898	0.0921579	0.0953357	0.0985136	0.101691	0.104869	0.108047	0.111225	0.114403	0.117581	0.120759
Kambalda West	Magmatic Sulfide	Australia	-31.35	121.5	8300	0.0083	22.0048	18.2218	40.2266	0.00402266	0.0147632	0.0147632	0.0295263	0.0442895	0.0590527	0.0738158	0.088579	0.103342	0.118105	0.132868	0.147632	0.162395	0.177158	0.191921	0.206684	0.221447	0.236211	0.250974	0.265737	0.2805	0.295263	0.310026	0.32479	0.339553	0.354316	0.369079	0.383842	0.398605	0.413369	0.428132	0.442895	0.457658	0.472421	0.487184	0.501948	0.516711	0.531474	0.546237	0.561
Leinster	Magmatic Sulfide	Australia	-28.16	120.91	8300	0.0083	0.474286	1.89006	2.36435	0.000236435	0.000867716	0.000867716	0.00173543	0.00260315	0.00347086	0.00433858	0.00520629	0.00607401	0.00694173	0.00780944	0.00867716	0.00954487	0.0104126	0.0112803	0.012148	0.0130157	0.0138835	0.0147512	0.0156189	0.0164866	0.0173543	0.018222	0.0190897	0.0199575	0.0208252	0.0216929	0.0225606	0.0234283	0.024296	0.0251638	0.0260315	0.0268992	0.0277669	0.0286346	0.0295023	0.03037	0.0312378	0.0321055	0.0329732
Langmuir W4	Magmatic Sulfide	Canada	48.29	-81.03	8224	0.008224	45.0827	16.0085	61.0911	0.00610911	0.0224205	0.0224205	0.0448409	0.0672614	0.0896818	0.112102	0.134523	0.156943	0.179364	0.201784	0.224205	0.246625	0.269045	0.291466	0.313886	0.336307	0.358727	0.381148	0.403568	0.425989	0.448409	0.470829	0.49325	0.51567	0.538091	0.560511	0.582932	0.605352	0.627773	0.650193	0.672614	0.695034	0.717454	0.739875	0.762295	0.784716	0.807136	0.829557	0.851977
Stormi	Magmatic Sulfide	Finland	61.33	23.02	7000	0.007	35.0612	15.1379	50.1992	0.00501992	0.0184231	0.0184231	0.0368462	0.0552693	0.0736924	0.0921154	0.110539	0.128962	0.147385	0.165808	0.184231	0.202654	0.221077	0.2395	0.257923	0.276346	0.294769	0.313193	0.331616	0.350039	0.368462	0.386885	0.405308	0.423731	0.442154	0.460577	0.479	0.497423	0.515847	0.53427	0.552693	0.571116	0.589539	0.607962	0.626385	0.644808	0.663231	0.681654	0.700077
Al Hamurah	Magmatic Sulfide	Yemen	13.32	44.28	7000	0.007	0.844266	3.09186	3.93613	0.000393613	0.00144456	0.00144456	0.00288912	0.00433368	0.00577824	0.0072228	0.00866735	0.0101119	0.0115565	0.013001	0.0144456	0.0158901	0.0173347	0.0187793	0.0202238	0.0216684	0.0231129	0.0245575	0.0260021	0.0274466	0.0288912	0.0303357	0.0317803	0.0332249	0.0346694	0.036114	0.0375585	0.0390031	0.0404477	0.0418922	0.0433368	0.0447813	0.0462259	0.0476704	0.049115	0.0505596	0.0520041	0.0534487	0.0548932
Lac Pegma	Magmatic Sulfide	Canada	52.37	-66.76	7000	0.007	26.6049	13.1458	39.7507	0.00397507	0.0145885	0.0145885	0.029177	0.0437655	0.058354	0.0729425	0.087531	0.10212	0.116708	0.131297	0.145885	0.160474	0.175062	0.189651	0.204239	0.218828	0.233416	0.248005	0.262593	0.277182	0.29177	0.306359	0.320947	0.335536	0.350124	0.364713	0.379301	0.39389	0.408478	0.423067	0.437655	0.452244	0.466832	0.481421	0.496009	0.510598	0.525186	0.539775	0.554363
St Stephen	Magmatic Sulfide	Canada	45.21	-67.31	6991	0.006991	41.0282	14.9	55.9282	0.00559282	0.0205257	0.0205257	0.0410513	0.061577	0.0821026	0.102628	0.123154	0.14368	0.164205	0.184731	0.205257	0.225782	0.246308	0.266833	0.287359	0.307885	0.32841	0.348936	0.369462	0.389987	0.410513	0.431039	0.451564	0.47209	0.492616	0.513141	0.533667	0.554193	0.574718	0.595244	0.61577	0.636295	0.656821	0.677347	0.697872	0.718398	0.738924	0.759449	0.779975
Marriott's	Magmatic Sulfide	Australia	-28.45	120.99	6900	0.0069	0.416504	1.71259	2.1291	0.00021291	0.000781378	0.000781378	0.00156276	0.00234413	0.00312551	0.00390689	0.00468827	0.00546965	0.00625102	0.0070324	0.00781378	0.00859516	0.00937654	0.0101579	0.0109393	0.0117207	0.012502	0.0132834	0.0140648	0.0148462	0.0156276	0.0164089	0.0171903	0.0179717	0.0187531	0.0195344	0.0203158	0.0210972	0.0218786	0.02266	0.0234413	0.0242227	0.0250041	0.0257855	0.0265669	0.0273482	0.0281296	0.028911	0.0296924
Grootboom	Magmatic Sulfide	South Africa	-24.76	30.17	6000	0.006	15.7281	28.2064	43.9345	0.00439345	0.016124	0.016124	0.0322479	0.0483719	0.0644958	0.0806198	0.0967437	0.112868	0.128992	0.145116	0.16124	0.177363	0.193487	0.209611	0.225735	0.241859	0.257983	0.274107	0.290231	0.306355	0.322479	0.338603	0.354727	0.370851	0.386975	0.403099	0.419223	0.435347	0.451471	0.467595	0.483719	0.499843	0.515967	0.53209	0.548214	0.564338	0.580462	0.596586	0.61271
East Bull	Magmatic Sulfide	Canada	46.41	-82.24	6000	0.006	40.4313	14.7975	55.2289	0.00552289	0.020269	0.020269	0.040538	0.060807	0.081076	0.101345	0.121614	0.141883	0.162152	0.182421	0.20269	0.222959	0.243228	0.263497	0.283766	0.304035	0.324304	0.344573	0.364842	0.385111	0.40538	0.425649	0.445918	0.466187	0.486456	0.506725	0.526994	0.547263	0.567532	0.587801	0.60807	0.628339	0.648608	0.668877	0.689146	0.709415	0.729684	0.749953	0.770222
Loveland	Magmatic Sulfide	Canada	48.67	-81.72	5900	0.0059	37.572	15.3689	52.9409	0.00529409	0.0194293	0.0194293	0.0388586	0.058288	0.0777173	0.0971466	0.116576	0.136005	0.155435	0.174864	0.194293	0.213723	0.233152	0.252581	0.272011	0.29144	0.310869	0.330299	0.349728	0.369157	0.388586	0.408016	0.427445	0.446874	0.466304	0.485733	0.505162	0.524592	0.544021	0.56345	0.58288	0.602309	0.621738	0.641168	0.660597	0.680026	0.699456	0.718885	0.738314
Canalask	Magmatic Sulfide	Canada	61.96	-140.5	5300	0.0053	27.8416	13.2489	41.0905	0.00410905	0.0150802	0.0150802	0.0301604	0.0452406	0.0603208	0.075401	0.0904812	0.105561	0.120642	0.135722	0.150802	0.165882	0.180962	0.196043	0.211123	0.226203	0.241283	0.256363	0.271444	0.286524	0.301604	0.316684	0.331764	0.346845	0.361925	0.377005	0.392085	0.407165	0.422245	0.437326	0.452406	0.467486	0.482566	0.497646	0.512727	0.527807	0.542887	0.557967	0.573047
Loveland	Magmatic Sulfide	Canada	48.66	-81.62	5262	0.005262	42.7452	16.2734	59.0185	0.00590185	0.0216598	0.0216598	0.0433196	0.0649794	0.0866392	0.108299	0.129959	0.151619	0.173278	0.194938	0.216598	0.238258	0.259918	0.281577	0.303237	0.324897	0.346557	0.368217	0.389876	0.411536	0.433196	0.454856	0.476516	0.498175	0.519835	0.541495	0.563155	0.584815	0.606474	0.628134	0.649794	0.671454	0.693114	0.714773	0.736433	0.758093	0.779753	0.801413	0.823072
Government Ground	Magmatic Sulfide	South Africa	-24.38	29.78	5100	0.0051	23.1237	39.2544	62.3781	0.00623781	0.0228927	0.0228927	0.0457855	0.0686782	0.091571	0.114464	0.137356	0.160249	0.183142	0.206035	0.228927	0.25182	0.274713	0.297606	0.320498	0.343391	0.366284	0.389177	0.412069	0.434962	0.457855	0.480748	0.50364	0.526533	0.549426	0.572319	0.595211	0.618104	0.640997	0.66389	0.686782	0.709675	0.732568	0.755461	0.778353	0.801246	0.824139	0.847032	0.869924
Njuggtraskliden	Magmatic Sulfide	Sweden	64.82	19.28	4100	0.0041	29.3328	17.9222	47.255	0.0047255	0.0173426	0.0173426	0.0346852	0.0520278	0.0693703	0.0867129	0.104056	0.121398	0.138741	0.156083	0.173426	0.190768	0.208111	0.225454	0.242796	0.260139	0.277481	0.294824	0.312167	0.329509	0.346852	0.364194	0.381537	0.39888	0.416222	0.433565	0.450907	0.46825	0.485592	0.502935	0.520278	0.53762	0.554963	0.572305	0.589648	0.606991	0.624333	0.641676	0.659018
Miriam	Magmatic Sulfide	Australia	-31.07	121.08	3900	0.0039	26.0557	20.4396	46.4953	0.00464953	0.0170638	0.0170638	0.0341276	0.0511913	0.0682551	0.0853189	0.102383	0.119446	0.13651	0.153574	0.170638	0.187702	0.204765	0.221829	0.238893	0.255957	0.27302	0.290084	0.307148	0.324212	0.341276	0.358339	0.375403	0.392467	0.409531	0.426595	0.443658	0.460722	0.477786	0.49485	0.511913	0.528977	0.546041	0.563105	0.580169	0.597232	0.614296	0.63136	0.648424
Massey-Whitesides	Magmatic Sulfide	Canada	48.45	-81.82	3900	0.0039	49.3121	16.5573	65.8694	0.00658694	0.0241741	0.0241741	0.0483481	0.0725222	0.0966963	0.12087	0.145044	0.169218	0.193393	0.217567	0.241741	0.265915	0.290089	0.314263	0.338437	0.362611	0.386785	0.410959	0.435133	0.459307	0.483481	0.507655	0.531829	0.556003	0.580178	0.604352	0.628526	0.6527	0.676874	0.701048	0.725222	0.749396	0.77357	0.797744	0.821918	0.846092	0.870266	0.89444	0.918614
Vulcain	Magmatic Sulfide	Canada	46.81	-76.7	3880	0.00388	47.4574	16.1988	63.6562	0.00636562	0.0233618	0.0233618	0.0467236	0.0700854	0.0934473	0.116809	0.140171	0.163533	0.186895	0.210256	0.233618	0.25698	0.280342	0.303704	0.327065	0.350427	0.373789	0.397151	0.420513	0.443874	0.467236	0.490598	0.51396	0.537322	0.560684	0.584045	0.607407	0.630769	0.654131	0.677493	0.700854	0.724216	0.747578	0.77094	0.794302	0.817663	0.841025	0.864387	0.887749
Jacobus	Magmatic Sulfide	Canada	49.85	-87.75	3800	0.0038	35.5648	13.7343	49.2991	0.00492991	0.0180928	0.0180928	0.0361855	0.0542783	0.0723711	0.0904639	0.108557	0.126649	0.144742	0.162835	0.180928	0.19902	0.217113	0.235206	0.253299	0.271392	0.289484	0.307577	0.32567	0.343763	0.361855	0.379948	0.398041	0.416134	0.434226	0.452319	0.470412	0.488505	0.506598	0.52469	0.542783	0.560876	0.578969	0.597061	0.615154	0.633247	0.65134	0.669432	0.687525
Dundonald	Magmatic Sulfide	Canada	48.63	-80.84	3700	0.0037	46.7067	17.4193	64.126	0.0064126	0.0235342	0.0235342	0.0470685	0.0706027	0.0941369	0.117671	0.141205	0.16474	0.188274	0.211808	0.235342	0.258877	0.282411	0.305945	0.329479	0.353013	0.376548	0.400082	0.423616	0.44715	0.470685	0.494219	0.517753	0.541287	0.564822	0.588356	0.61189	0.635424	0.658958	0.682493	0.706027	0.729561	0.753095	0.77663	0.800164	0.823698	0.847232	0.870767	0.894301
Rostvangen-Kvikne-Vakkerlien	Magmatic Sulfide	Norway	62.52	10.31	3629	0.003629	13.5512	8.89457	22.4458	0.00224458	0.00823761	0.00823761	0.0164752	0.0247128	0.0329504	0.041188	0.0494257	0.0576633	0.0659009	0.0741385	0.0823761	0.0906137	0.0988513	0.107089	0.115327	0.123564	0.131802	0.140039	0.148277	0.156515	0.164752	0.17299	0.181227	0.189465	0.197703	0.20594	0.214178	0.222415	0.230653	0.238891	0.247128	0.255366	0.263604	0.271841	0.280079	0.288316	0.296554	0.304792	0.313029
Elmhirst	Magmatic Sulfide	Canada	49.83	-87.76	3600	0.0036	38.1802	14.394	52.5742	0.00525742	0.0192947	0.0192947	0.0385895	0.0578842	0.077179	0.0964737	0.115768	0.135063	0.154358	0.173653	0.192947	0.212242	0.231537	0.250832	0.270126	0.289421	0.308716	0.328011	0.347305	0.3666	0.385895	0.40519	0.424484	0.443779	0.463074	0.482369	0.501663	0.520958	0.540253	0.559548	0.578842	0.598137	0.617432	0.636727	0.656021	0.675316	0.694611	0.713906	0.7332
Ajax	Magmatic Sulfide	Canada	47.1	-79.84	3200	0.0032	49.2608	16.5284	65.7892	0.00657892	0.0241446	0.0241446	0.0482892	0.0724339	0.0965785	0.120723	0.144868	0.169012	0.193157	0.217302	0.241446	0.265591	0.289735	0.31388	0.338025	0.362169	0.386314	0.410459	0.434603	0.458748	0.482892	0.507037	0.531182	0.555326	0.579471	0.603615	0.62776	0.651905	0.676049	0.700194	0.724339	0.748483	0.772628	0.796772	0.820917	0.845062	0.869206	0.893351	0.917496
Snake Hill	Magmatic Sulfide	Australia	-29.22	120.53	3200	0.0032	1.92232	4.91504	6.83736	0.000683736	0.00250931	0.00250931	0.00501862	0.00752793	0.0100372	0.0125466	0.0150559	0.0175652	0.0200745	0.0225838	0.0250931	0.0276024	0.0301117	0.0326211	0.0351304	0.0376397	0.040149	0.0426583	0.0451676	0.0476769	0.0501862	0.0526955	0.0552049	0.0577142	0.0602235	0.0627328	0.0652421	0.0677514	0.0702607	0.07277	0.0752793	0.0777887	0.080298	0.0828073	0.0853166	0.0878259	0.0903352	0.0928445	0.0953538
Carnilya Hill	Magmatic Sulfide	Australia	-31.05	121.86	3000	0.003	2.80526	4.97066	7.77592	0.000777592	0.00285376	0.00285376	0.00570752	0.00856128	0.011415	0.0142688	0.0171226	0.0199763	0.0228301	0.0256839	0.0285376	0.0313914	0.0342451	0.0370989	0.0399527	0.0428064	0.0456602	0.0485139	0.0513677	0.0542215	0.0570752	0.059929	0.0627828	0.0656365	0.0684903	0.071344	0.0741978	0.0770516	0.0799053	0.0827591	0.0856128	0.0884666	0.0913204	0.0941741	0.0970279	0.0998817	0.102735	0.105589	0.108443
Villebon	Magmatic Sulfide	Canada	47.89	-77.29	3000	0.003	34.7839	14.5942	49.3781	0.00493781	0.0181218	0.0181218	0.0362435	0.0543653	0.0724871	0.0906089	0.108731	0.126852	0.144974	0.163096	0.181218	0.19934	0.217461	0.235583	0.253705	0.271827	0.289948	0.30807	0.326192	0.344314	0.362435	0.380557	0.398679	0.416801	0.434923	0.453044	0.471166	0.489288	0.50741	0.525531	0.543653	0.561775	0.579897	0.598019	0.61614	0.634262	0.652384	0.670506	0.688627
Sothman	Magmatic Sulfide	Canada	47.84	-81.24	2800	0.0028	37.6484	14.0266	51.6749	0.00516749	0.0189647	0.0189647	0.0379294	0.0568941	0.0758588	0.0948235	0.113788	0.132753	0.151718	0.170682	0.189647	0.208612	0.227576	0.246541	0.265506	0.28447	0.303435	0.3224	0.341365	0.360329	0.379294	0.398259	0.417223	0.436188	0.455153	0.474117	0.493082	0.512047	0.531012	0.549976	0.568941	0.587906	0.60687	0.625835	0.6448	0.663764	0.682729	0.701694	0.720659
Langmuir 2	Magmatic Sulfide	Canada	48.34	-81	2800	0.0028	50.3314	17.8028	68.1342	0.00681342	0.0250052	0.0250052	0.0500105	0.0750157	0.100021	0.125026	0.150031	0.175037	0.200042	0.225047	0.250052	0.275058	0.300063	0.325068	0.350073	0.375079	0.400084	0.425089	0.450094	0.4751	0.500105	0.52511	0.550115	0.57512	0.600126	0.625131	0.650136	0.675141	0.700147	0.725152	0.750157	0.775162	0.800168	0.825173	0.850178	0.875183	0.900189	0.925194	0.950199
Armstrong	Magmatic Sulfide	Australia	-31.5	121.53	2370	0.00237	29.5985	22.6395	52.238	0.0052238	0.0191714	0.0191714	0.0383427	0.0575141	0.0766854	0.0958568	0.115028	0.134199	0.153371	0.172542	0.191714	0.210885	0.230056	0.249228	0.268399	0.28757	0.306742	0.325913	0.345084	0.364256	0.383427	0.402598	0.42177	0.440941	0.460113	0.479284	0.498455	0.517627	0.536798	0.555969	0.575141	0.594312	0.613483	0.632655	0.651826	0.670997	0.690169	0.70934	0.728511
Bunkerville	Magmatic Sulfide	USA	36.61	-114.16	2200	0.0022	1.09503	2.31453	3.40957	0.000340957	0.00125131	0.00125131	0.00250262	0.00375393	0.00500524	0.00625655	0.00750786	0.00875917	0.0100105	0.0112618	0.0125131	0.0137644	0.0150157	0.016267	0.0175183	0.0187697	0.020021	0.0212723	0.0225236	0.0237749	0.0250262	0.0262775	0.0275288	0.0287801	0.0300315	0.0312828	0.0325341	0.0337854	0.0350367	0.036288	0.0375393	0.0387906	0.0400419	0.0412932	0.0425446	0.0437959	0.0450472	0.0462985	0.0475498
Nickel Island	Magmatic Sulfide	Canada	48.63	-80.87	1900	0.0019	43.5499	16.7204	60.2703	0.00602703	0.0221192	0.0221192	0.0442384	0.0663576	0.0884768	0.110596	0.132715	0.154834	0.176954	0.199073	0.221192	0.243311	0.265431	0.28755	0.309669	0.331788	0.353907	0.376027	0.398146	0.420265	0.442384	0.464503	0.486623	0.508742	0.530861	0.55298	0.575099	0.597219	0.619338	0.641457	0.663576	0.685695	0.707815	0.729934	0.752053	0.774172	0.796292	0.818411	0.84053
Sarkalahti	Magmatic Sulfide	Finland	62.5	27.88	1900	0.0019	41.6734	16.1043	57.7777	0.00577777	0.0212044	0.0212044	0.0424088	0.0636132	0.0848177	0.106022	0.127226	0.148431	0.169635	0.19084	0.212044	0.233249	0.254453	0.275657	0.296862	0.318066	0.339271	0.360475	0.381679	0.402884	0.424088	0.445293	0.466497	0.487702	0.508906	0.53011	0.551315	0.572519	0.593724	0.614928	0.636132	0.657337	0.678541	0.699746	0.72095	0.742155	0.763359	0.784563	0.805768
Mantymaki	Magmatic Sulfide	Finland	61.31	22.8	1824	0.001824	27.3021	14.6267	41.9289	0.00419289	0.0153879	0.0153879	0.0307758	0.0461637	0.0615516	0.0769395	0.0923274	0.107715	0.123103	0.138491	0.153879	0.169267	0.184655	0.200043	0.215431	0.230818	0.246206	0.261594	0.276982	0.29237	0.307758	0.323146	0.338534	0.353922	0.36931	0.384697	0.400085	0.415473	0.430861	0.446249	0.461637	0.477025	0.492413	0.507801	0.523189	0.538576	0.553964	0.569352	0.58474
Hyvela	Magmatic Sulfide	Finland	61.54	21.81	1753	0.001753	28.4309	15.9199	44.3508	0.00443508	0.0162767	0.0162767	0.0325535	0.0488302	0.065107	0.0813837	0.0976605	0.113937	0.130214	0.146491	0.162767	0.179044	0.195321	0.211598	0.227874	0.244151	0.260428	0.276705	0.292981	0.309258	0.325535	0.341812	0.358088	0.374365	0.390642	0.406919	0.423195	0.439472	0.455749	0.472026	0.488302	0.504579	0.520856	0.537133	0.553409	0.569686	0.585963	0.60224	0.618516
Saramaki	Magmatic Sulfide	Finland	62.93	29.13	1700	0.0017	45.4563	17.0799	62.5363	0.00625363	0.0229508	0.0229508	0.0459016	0.0688524	0.0918032	0.114754	0.137705	0.160656	0.183606	0.206557	0.229508	0.252459	0.27541	0.298361	0.321311	0.344262	0.367213	0.390164	0.413115	0.436065	0.459016	0.481967	0.504918	0.527869	0.550819	0.57377	0.596721	0.619672	0.642623	0.665573	0.688524	0.711475	0.734426	0.757377	0.780327	0.803278	0.826229	0.84918	0.872131
Mt Jewell	Magmatic Sulfide	Australia	-30.18	121.45	1700	0.0017	2.32123	5.31049	7.63173	0.000763173	0.00280084	0.00280084	0.00560169	0.00840253	0.0112034	0.0140042	0.0168051	0.0196059	0.0224068	0.0252076	0.0280084	0.0308093	0.0336101	0.036411	0.0392118	0.0420127	0.0448135	0.0476144	0.0504152	0.053216	0.0560169	0.0588177	0.0616186	0.0644194	0.0672203	0.0700211	0.072822	0.0756228	0.0784236	0.0812245	0.0840253	0.0868262	0.089627	0.0924279	0.0952287	0.0980296	0.10083	0.103631	0.106432
Midrim	Magmatic Sulfide	Canada	47.47	-79.23	1600	0.0016	39.1064	15.5748	54.6812	0.00546812	0.020068	0.020068	0.040136	0.060204	0.080272	0.10034	0.120408	0.140476	0.160544	0.180612	0.20068	0.220748	0.240816	0.260884	0.280952	0.30102	0.321088	0.341156	0.361224	0.381292	0.40136	0.421428	0.441496	0.461564	0.481632	0.5017	0.521768	0.541836	0.561904	0.581972	0.60204	0.622108	0.642176	0.662244	0.682312	0.70238	0.722448	0.742516	0.762584
Mirror Harbor	Magmatic Sulfide	USA	57.78	-136.3	1500	0.0015	52.4439	16.8026	69.2465	0.00692465	0.0254135	0.0254135	0.0508269	0.0762404	0.101654	0.127067	0.152481	0.177894	0.203308	0.228721	0.254135	0.279548	0.304962	0.330375	0.355789	0.381202	0.406616	0.432029	0.457442	0.482856	0.508269	0.533683	0.559096	0.58451	0.609923	0.635337	0.66075	0.686164	0.711577	0.736991	0.762404	0.787818	0.813231	0.838645	0.864058	0.889471	0.914885	0.940298	0.965712
Corkwood	Magmatic Sulfide	Australia	-17.29	128.18	1500	0.0015	0.945153	2.51755	3.4627	0.00034627	0.00127081	0.00127081	0.00254162	0.00381243	0.00508324	0.00635405	0.00762486	0.00889567	0.0101665	0.0114373	0.0127081	0.0139789	0.0152497	0.0165205	0.0177913	0.0190622	0.020333	0.0216038	0.0228746	0.0241454	0.0254162	0.026687	0.0279578	0.0292286	0.0304995	0.0317703	0.0330411	0.0343119	0.0355827	0.0368535	0.0381243	0.0393951	0.0406659	0.0419368	0.0432076	0.0444784	0.0457492	0.04702	0.0482908
Niinimaki	Magmatic Sulfide	Finland	61.67	27.94	1082	0.001082	45.4757	16.1661	61.6418	0.00616418	0.0226225	0.0226225	0.0452451	0.0678676	0.0904902	0.113113	0.135735	0.158358	0.18098	0.203603	0.226225	0.248848	0.271471	0.294093	0.316716	0.339338	0.361961	0.384583	0.407206	0.429828	0.452451	0.475073	0.497696	0.520319	0.542941	0.565564	0.588186	0.610809	0.633431	0.656054	0.678676	0.701299	0.723921	0.746544	0.769167	0.791789	0.814412	0.837034	0.859657
Sarkiniemi	Magmatic Sulfide	Finland	62.57	27.66	700	0.0007	42.2205	15.8677	58.0883	0.00580883	0.0213184	0.0213184	0.0426368	0.0639552	0.0852736	0.106592	0.12791	0.149229	0.170547	0.191866	0.213184	0.234502	0.255821	0.277139	0.298458	0.319776	0.341094	0.362413	0.383731	0.40505	0.426368	0.447686	0.469005	0.490323	0.511642	0.53296	0.554278	0.575597	0.596915	0.618234	0.639552	0.66087	0.682189	0.703507	0.724826	0.746144	0.767462	0.788781	0.810099
RM	Magmatic Sulfide	Canada	48.2	-79.27	607	0.000607	44.7061	17.1273	61.8334	0.00618334	0.0226928	0.0226928	0.0453857	0.0680785	0.0907714	0.113464	0.136157	0.15885	0.181543	0.204236	0.226928	0.249621	0.272314	0.295007	0.3177	0.340393	0.363086	0.385778	0.408471	0.431164	0.453857	0.47655	0.499243	0.521936	0.544628	0.567321	0.590014	0.612707	0.6354	0.658093	0.680785	0.703478	0.726171	0.748864	0.771557	0.79425	0.816943	0.839635	0.862328
Milestone	Magmatic Sulfide	Canada	47.03	-79.82	454	0.000454	53.6815	17.5499	71.2314	0.00712314	0.0261419	0.0261419	0.0522839	0.0784258	0.104568	0.13071	0.156852	0.182994	0.209135	0.235277	0.261419	0.287561	0.313703	0.339845	0.365987	0.392129	0.418271	0.444413	0.470555	0.496697	0.522839	0.548981	0.575122	0.601264	0.627406	0.653548	0.67969	0.705832	0.731974	0.758116	0.784258	0.8104	0.836542	0.862684	0.888826	0.914968	0.941109	0.967251	0.993393
River's Option	Magmatic Sulfide	Canada	46.82	-81.31	266	0.000266	37.6884	14.333	52.0214	0.00520214	0.0190919	0.0190919	0.0381837	0.0572756	0.0763675	0.0954593	0.114551	0.133643	0.152735	0.171827	0.190919	0.210011	0.229102	0.248194	0.267286	0.286378	0.30547	0.324562	0.343654	0.362745	0.381837	0.400929	0.420021	0.439113	0.458205	0.477297	0.496388	0.51548	0.534572	0.553664	0.572756	0.591848	0.61094	0.630032	0.649123	0.668215	0.687307	0.706399	0.725491
Riihilahti	Magmatic Sulfide	Finland	62.71	28.69	216	0.000216	45.5056	16.7612	62.2668	0.00622668	0.0228519	0.0228519	0.0457038	0.0685557	0.0914076	0.114259	0.137111	0.159963	0.182815	0.205667	0.228519	0.251371	0.274223	0.297075	0.319927	0.342778	0.36563	0.388482	0.411334	0.434186	0.457038	0.47989	0.502742	0.525594	0.548446	0.571297	0.594149	0.617001	0.639853	0.662705	0.685557	0.708409	0.731261	0.754113	0.776965	0.799816	0.822668	0.84552	0.868372
Southern Samar	Laterite	Philippines	10.76	125.67	4500000	4.5	47.1063	12.3377	59.4441	0.00594441	0.021816	0.021816	0.0436319	0.0654479	0.0872639	0.10908	0.130896	0.152712	0.174528	0.196344	0.21816	0.239976	0.261792	0.283608	0.305424	0.32724	0.349056	0.370872	0.392687	0.414503	0.436319	0.458135	0.479951	0.501767	0.523583	0.545399	0.567215	0.589031	0.610847	0.632663	0.654479	0.676295	0.698111	0.719927	0.741743	0.763559	0.785375	0.807191	0.829007
Kalgoorlie	Laterite	Australia	-30.14	121.18	4425500	4.4255	1.03313	3.42245	4.45558	0.000445558	0.0016352	0.0016352	0.0032704	0.0049056	0.0065408	0.00817599	0.00981119	0.0114464	0.0130816	0.0147168	0.016352	0.0179872	0.0196224	0.0212576	0.0228928	0.024528	0.0261632	0.0277984	0.0294336	0.0310688	0.032704	0.0343392	0.0359744	0.0376096	0.0392448	0.04088	0.0425152	0.0441504	0.0457856	0.0474208	0.049056	0.0506912	0.0523264	0.0539616	0.0555968	0.057232	0.0588672	0.0605024	0.0621376
Pinares de Mayari	Laterite	Cuba	20.56	-75.7	4400000	4.4	27.3301	8.90037	36.2304	0.00362304	0.0132966	0.0132966	0.0265931	0.0398897	0.0531863	0.0664829	0.0797794	0.093076	0.106373	0.119669	0.132966	0.146262	0.159559	0.172855	0.186152	0.199449	0.212745	0.226042	0.239338	0.252635	0.265931	0.279228	0.292525	0.305821	0.319118	0.332414	0.345711	0.359007	0.372304	0.385601	0.398897	0.412194	0.42549	0.438787	0.452083	0.46538	0.478677	0.491973	0.50527
Gag Island	Laterite	Indonesia	-0.45	129.87	3920000	3.92	94.0161	21.9165	115.933	0.0115933	0.0425473	0.0425473	0.0850945	0.127642	0.170189	0.212736	0.255284	0.297831	0.340378	0.382925	0.425473	0.46802	0.510567	0.553115	0.595662	0.638209	0.680756	0.723304	0.765851	0.808398	0.850945	0.893493	0.93604	0.978587	1.02113	1.06368	1.10623	1.14878	1.19132	1.23387	1.27642	1.31897	1.36151	1.40406	1.44661	1.48915	1.5317	1.57425	1.6168
Jacare	Laterite	Brazil	-6.16	-51.86	3913000	3.913	58.6586	14.1496	72.8082	0.00728082	0.0267206	0.0267206	0.0534412	0.0801618	0.106882	0.133603	0.160324	0.187044	0.213765	0.240485	0.267206	0.293927	0.320647	0.347368	0.374089	0.400809	0.42753	0.45425	0.480971	0.507692	0.534412	0.561133	0.587853	0.614574	0.641295	0.668015	0.694736	0.721456	0.748177	0.774898	0.801618	0.828339	0.855059	0.88178	0.908501	0.935221	0.961942	0.988663	1.01538
Nakety/Moneo	Laterite	New Caledonia	-21.52	166.09	3855000	3.855	17.7636	8.40841	26.172	0.0026172	0.00960512	0.00960512	0.0192102	0.0288154	0.0384205	0.0480256	0.0576307	0.0672358	0.0768409	0.0864461	0.0960512	0.105656	0.115261	0.124867	0.134472	0.144077	0.153682	0.163287	0.172892	0.182497	0.192102	0.201707	0.211313	0.220918	0.230523	0.240128	0.249733	0.259338	0.268943	0.278548	0.288154	0.297759	0.307364	0.316969	0.326574	0.336179	0.345784	0.355389	0.364994
Biankouma-Sipilou	Laterite	Cote d'Ivoire	7.86	-7.91	3810000	3.81	27.3839	12.4099	39.7938	0.00397938	0.0146043	0.0146043	0.0292086	0.043813	0.0584173	0.0730216	0.0876259	0.10223	0.116835	0.131439	0.146043	0.160648	0.175252	0.189856	0.20446	0.219065	0.233669	0.248273	0.262878	0.277482	0.292086	0.306691	0.321295	0.335899	0.350504	0.365108	0.379712	0.394317	0.408921	0.423525	0.43813	0.452734	0.467338	0.481943	0.496547	0.511151	0.525756	0.54036	0.554964
San Felipe	Laterite	Cuba	21.54	-77.96	3250000	3.25	14.2857	5.28482	19.5705	0.00195705	0.00718238	0.00718238	0.0143648	0.0215471	0.0287295	0.0359119	0.0430943	0.0502767	0.057459	0.0646414	0.0718238	0.0790062	0.0861885	0.0933709	0.100553	0.107736	0.114918	0.1221	0.129283	0.136465	0.143648	0.15083	0.158012	0.165195	0.172377	0.179559	0.186742	0.193924	0.201107	0.208289	0.215471	0.222654	0.229836	0.237019	0.244201	0.251383	0.258566	0.265748	0.27293
Bugotu	Laterite	Solomon Islands	-8.51	159.63	3000000	3	75.5607	17.7082	93.2689	0.00932689	0.0342297	0.0342297	0.0684594	0.102689	0.136919	0.171148	0.205378	0.239608	0.273837	0.308067	0.342297	0.376526	0.410756	0.444986	0.479215	0.513445	0.547675	0.581904	0.616134	0.650364	0.684594	0.718823	0.753053	0.787283	0.821512	0.855742	0.889972	0.924201	0.958431	0.992661	1.02689	1.06112	1.09535	1.12958	1.16381	1.19804	1.23227	1.2665	1.30073
Sichuan Jinguang	Laterite	Philippines	9.96	118.78	3000000	3	51.5778	13.3362	64.914	0.0064914	0.0238234	0.0238234	0.0476469	0.0714703	0.0952937	0.119117	0.142941	0.166764	0.190587	0.214411	0.238234	0.262058	0.285881	0.309705	0.333528	0.357352	0.381175	0.404998	0.428822	0.452645	0.476469	0.500292	0.524116	0.547939	0.571762	0.595586	0.619409	0.643233	0.667056	0.69088	0.714703	0.738526	0.76235	0.786173	0.809997	0.83382	0.857644	0.881467	0.905291
Surigao	Laterite	Philippines	9.64	118.38	2952000	2.952	69.9366	17.2585	87.1952	0.00871952	0.0320006	0.0320006	0.0640013	0.0960019	0.128003	0.160003	0.192004	0.224004	0.256005	0.288006	0.320006	0.352007	0.384008	0.416008	0.448009	0.480009	0.51201	0.544011	0.576011	0.608012	0.640013	0.672013	0.704014	0.736014	0.768015	0.800016	0.832016	0.864017	0.896018	0.928018	0.960019	0.992019	1.02402	1.05602	1.08802	1.12002	1.15202	1.18402	1.21602
Mindoro	Laterite	Philippines	13.05	121.13	2926000	2.926	68.3826	18.0393	86.4219	0.00864219	0.0317168	0.0317168	0.0634336	0.0951505	0.126867	0.158584	0.190301	0.222018	0.253735	0.285451	0.317168	0.348885	0.380602	0.412319	0.444035	0.475752	0.507469	0.539186	0.570903	0.60262	0.634336	0.666053	0.69777	0.729487	0.761204	0.79292	0.824637	0.856354	0.888071	0.919788	0.951505	0.983221	1.01494	1.04666	1.07837	1.11009	1.14181	1.17352	1.20524
Musongati	Laterite	Burundi	-3.74	30.24	2886000	2.886	12.5189	7.0805	19.5994	0.00195994	0.00719297	0.00719297	0.0143859	0.0215789	0.0287719	0.0359649	0.0431578	0.0503508	0.0575438	0.0647367	0.0719297	0.0791227	0.0863157	0.0935086	0.100702	0.107895	0.115088	0.122281	0.129473	0.136666	0.143859	0.151052	0.158245	0.165438	0.172631	0.179824	0.187017	0.19421	0.201403	0.208596	0.215789	0.222982	0.230175	0.237368	0.244561	0.251754	0.258947	0.26614	0.273333
Pomalaa East	Laterite	Indonesia	-4.22	121.68	2690000	2.69	78.4657	19.3317	97.7974	0.00977974	0.0358916	0.0358916	0.0717833	0.107675	0.143567	0.179458	0.21535	0.251242	0.287133	0.323025	0.358916	0.394808	0.4307	0.466591	0.502483	0.538375	0.574266	0.610158	0.64605	0.681941	0.717833	0.753725	0.789616	0.825508	0.8614	0.897291	0.933183	0.969075	1.00497	1.04086	1.07675	1.11264	1.14853	1.18442	1.22032	1.25621	1.2921	1.32799	1.36388
La Sampala	Laterite	Indonesia	-2.7	121.92	2624400	2.6244	87.2986	21.2005	108.499	0.0108499	0.0398192	0.0398192	0.0796384	0.119458	0.159277	0.199096	0.238915	0.278734	0.318553	0.358373	0.398192	0.438011	0.47783	0.517649	0.557469	0.597288	0.637107	0.676926	0.716745	0.756564	0.796384	0.836203	0.876022	0.915841	0.95566	0.99548	1.0353	1.07512	1.11494	1.15476	1.19458	1.23439	1.27421	1.31403	1.35385	1.39367	1.43349	1.47331	1.51313
Pujada	Laterite	Philippines	6.76	126.15	2600000	2.6	73.2949	18.8489	92.1438	0.00921438	0.0338168	0.0338168	0.0676335	0.10145	0.135267	0.169084	0.202901	0.236717	0.270534	0.304351	0.338168	0.371984	0.405801	0.439618	0.473435	0.507251	0.541068	0.574885	0.608702	0.642518	0.676335	0.710152	0.743969	0.777786	0.811602	0.845419	0.879236	0.913053	0.946869	0.980686	1.0145	1.04832	1.08214	1.11595	1.14977	1.18359	1.2174	1.25122	1.28504
Araguaia	Laterite	Brazil	-7.99	-49.41	2568926	2.56893	18.3557	6.88	25.2357	0.00252357	0.00926148	0.00926148	0.018523	0.0277845	0.0370459	0.0463074	0.0555689	0.0648304	0.0740919	0.0833534	0.0926148	0.101876	0.111138	0.120399	0.129661	0.138922	0.148184	0.157445	0.166707	0.175968	0.18523	0.194491	0.203753	0.213014	0.222276	0.231537	0.240799	0.25006	0.259322	0.268583	0.277845	0.287106	0.296367	0.305629	0.31489	0.324152	0.333413	0.342675	0.351936
Mount Margaret	Laterite	Australia	-28.31	120.98	2101400	2.1014	0.46	1.75067	2.21067	0.000221067	0.000811318	0.000811318	0.00162264	0.00243395	0.00324527	0.00405659	0.00486791	0.00567922	0.00649054	0.00730186	0.00811318	0.00892449	0.00973581	0.0105471	0.0113584	0.0121698	0.0129811	0.0137924	0.0146037	0.015415	0.0162264	0.0170377	0.017849	0.0186603	0.0194716	0.0202829	0.0210943	0.0219056	0.0227169	0.0235282	0.0243395	0.0251508	0.0259622	0.0267735	0.0275848	0.0283961	0.0292074	0.0300188	0.0308301
Tavai	Laterite	Malaysia	5.58	117.33	2025000	2.025	53.2143	12.9779	66.1922	0.00661922	0.0242925	0.0242925	0.0485851	0.0728776	0.0971702	0.121463	0.145755	0.170048	0.19434	0.218633	0.242925	0.267218	0.291511	0.315803	0.340096	0.364388	0.388681	0.412973	0.437266	0.461558	0.485851	0.510144	0.534436	0.558729	0.583021	0.607314	0.631606	0.655899	0.680191	0.704484	0.728776	0.753069	0.777362	0.801654	0.825947	0.850239	0.874532	0.898824	0.923117
Central Musgrave	Laterite	Australia	-26.05	128.95	1953464	1.95346	0.541872	2.27081	2.81268	0.000281268	0.00103226	0.00103226	0.00206451	0.00309677	0.00412902	0.00516128	0.00619353	0.00722579	0.00825804	0.0092903	0.0103226	0.0113548	0.0123871	0.0134193	0.0144516	0.0154838	0.0165161	0.0175483	0.0185806	0.0196129	0.0206451	0.0216774	0.0227096	0.0237419	0.0247741	0.0258064	0.0268386	0.0278709	0.0289031	0.0299354	0.0309677	0.0319999	0.0330322	0.0340644	0.0350967	0.0361289	0.0371612	0.0381934	0.0392257
Maba	Laterite	Indonesia	0.7	128.26	1938000	1.938	102.202	24.0703	126.272	0.0126272	0.0463419	0.0463419	0.0926838	0.139026	0.185368	0.231709	0.278051	0.324393	0.370735	0.417077	0.463419	0.509761	0.556103	0.602444	0.648786	0.695128	0.74147	0.787812	0.834154	0.880496	0.926838	0.973179	1.01952	1.06586	1.11221	1.15855	1.20489	1.25123	1.29757	1.34391	1.39026	1.4366	1.48294	1.52928	1.57562	1.62197	1.66831	1.71465	1.76099
Nonoc	Laterite	Philippines	9.83	125.61	1584000	1.584	38.1422	10.233	48.3752	0.00483752	0.0177537	0.0177537	0.0355074	0.0532611	0.0710148	0.0887685	0.106522	0.124276	0.14203	0.159783	0.177537	0.195291	0.213044	0.230798	0.248552	0.266306	0.284059	0.301813	0.319567	0.33732	0.355074	0.372828	0.390581	0.408335	0.426089	0.443843	0.461596	0.47935	0.497104	0.514857	0.532611	0.550365	0.568118	0.585872	0.603626	0.62138	0.639133	0.656887	0.674641
Vermelho	Laterite	Brazil	-6.48	-49.89	1555000	1.555	20.509	7.42135	27.9303	0.00279303	0.0102504	0.0102504	0.0205008	0.0307513	0.0410017	0.0512521	0.0615025	0.071753	0.0820034	0.0922538	0.102504	0.112755	0.123005	0.133255	0.143506	0.153756	0.164007	0.174257	0.184508	0.194758	0.205008	0.215259	0.225509	0.23576	0.24601	0.256261	0.266511	0.276761	0.287012	0.297262	0.307513	0.317763	0.328014	0.338264	0.348514	0.358765	0.369015	0.379266	0.389516
Mayaniquel	Laterite	Guatemala	15.44	-89.64	1541187	1.54119	48.6513	12.5166	61.168	0.0061168	0.0224486	0.0224486	0.0448973	0.0673459	0.0897946	0.112243	0.134692	0.15714	0.179589	0.202038	0.224486	0.246935	0.269384	0.291832	0.314281	0.33673	0.359178	0.381627	0.404075	0.426524	0.448973	0.471421	0.49387	0.516319	0.538767	0.561216	0.583665	0.606113	0.628562	0.65101	0.673459	0.695908	0.718356	0.740805	0.763254	0.785702	0.808151	0.8306	0.853048
Mambare	Laterite	Papua New Guinea	-8.78	147.74	1530000	1.53	118.449	28.2947	146.744	0.0146744	0.0538551	0.0538551	0.10771	0.161565	0.21542	0.269276	0.323131	0.376986	0.430841	0.484696	0.538551	0.592406	0.646261	0.700116	0.753972	0.807827	0.861682	0.915537	0.969392	1.02325	1.0771	1.13096	1.18481	1.23867	1.29252	1.34638	1.40023	1.45409	1.50794	1.5618	1.61565	1.66951	1.72336	1.77722	1.83107	1.88493	1.93878	1.99264	2.04649
Santa Fe/Ipora	Laterite	Brazil	-15.72	-51.14	1481000	1.481	10.8126	6.8411	17.6537	0.00176537	0.00647892	0.00647892	0.0129578	0.0194368	0.0259157	0.0323946	0.0388735	0.0453525	0.0518314	0.0583103	0.0647892	0.0712682	0.0777471	0.084226	0.0907049	0.0971839	0.103663	0.110142	0.116621	0.1231	0.129578	0.136057	0.142536	0.149015	0.155494	0.161973	0.168452	0.174931	0.18141	0.187889	0.194368	0.200847	0.207326	0.213804	0.220283	0.226762	0.233241	0.23972	0.246199
Las Camariocas/Cupey	Laterite	Cuba	20.61	-74.83	1412000	1.412	26.449	8.51899	34.9679	0.00349679	0.0128332	0.0128332	0.0256665	0.0384997	0.0513329	0.0641662	0.0769994	0.0898326	0.102666	0.115499	0.128332	0.141166	0.153999	0.166832	0.179665	0.192499	0.205332	0.218165	0.230998	0.243831	0.256665	0.269498	0.282331	0.295164	0.307998	0.320831	0.333664	0.346497	0.359331	0.372164	0.384997	0.39783	0.410664	0.423497	0.43633	0.449163	0.461996	0.47483	0.487663
Avalon	Laterite	Australia	-30.69	121.82	1403000	1.403	7.11509	9.20245	16.3175	0.00163175	0.00598854	0.00598854	0.0119771	0.0179656	0.0239542	0.0299427	0.0359312	0.0419198	0.0479083	0.0538969	0.0598854	0.0658739	0.0718625	0.077851	0.0838396	0.0898281	0.0958166	0.101805	0.107794	0.113782	0.119771	0.125759	0.131748	0.137736	0.143725	0.149713	0.155702	0.161691	0.167679	0.173668	0.179656	0.185645	0.191633	0.197622	0.20361	0.209599	0.215587	0.221576	0.227564
Wowo Gap	Laterite	Papua New Guinea	-9.54	148.91	1325000	1.325	130.285	31.1282	161.413	0.0161413	0.0592385	0.0592385	0.118477	0.177716	0.236954	0.296193	0.355431	0.41467	0.473908	0.533147	0.592385	0.651624	0.710862	0.770101	0.82934	0.888578	0.947817	1.00706	1.06629	1.12553	1.18477	1.24401	1.30325	1.36249	1.42172	1.48096	1.5402	1.59944	1.65868	1.71792	1.77716	1.83639	1.89563	1.95487	2.01411	2.07335	2.13259	2.19183	2.25106
Eramen Zambales	Laterite	Philippines	15.79	120	1307000	1.307	21.6664	6.00917	27.6756	0.00276756	0.0101569	0.0101569	0.0203139	0.0304708	0.0406277	0.0507846	0.0609416	0.0710985	0.0812554	0.0914123	0.101569	0.111726	0.121883	0.13204	0.142197	0.152354	0.162511	0.172668	0.182825	0.192982	0.203139	0.213295	0.223452	0.233609	0.243766	0.253923	0.26408	0.274237	0.284394	0.294551	0.304708	0.314865	0.325022	0.335179	0.345336	0.355492	0.365649	0.375806	0.385963
Montes Claros	Laterite	Brazil	-16	-51.39	1289000	1.289	12.8434	7.01993	19.8633	0.00198633	0.00728984	0.00728984	0.0145797	0.0218695	0.0291594	0.0364492	0.043739	0.0510289	0.0583187	0.0656086	0.0728984	0.0801882	0.0874781	0.0947679	0.102058	0.109348	0.116637	0.123927	0.131217	0.138507	0.145797	0.153087	0.160376	0.167666	0.174956	0.182246	0.189536	0.196826	0.204116	0.211405	0.218695	0.225985	0.233275	0.240565	0.247855	0.255144	0.262434	0.269724	0.277014
Zambales	Laterite	Philippines	15.71	120.05	1231000	1.231	47.1418	12.0762	59.218	0.0059218	0.021733	0.021733	0.043466	0.065199	0.086932	0.108665	0.130398	0.152131	0.173864	0.195597	0.21733	0.239063	0.260796	0.282529	0.304262	0.325995	0.347728	0.369461	0.391194	0.412927	0.43466	0.456393	0.478126	0.499859	0.521592	0.543325	0.565058	0.586791	0.608524	0.630257	0.65199	0.673723	0.695456	0.717189	0.738922	0.760655	0.782388	0.804121	0.825854
Cawse	Laterite	Australia	-30.37	121.14	1219300	1.2193	5.3135	8.03448	13.348	0.0013348	0.00489871	0.00489871	0.00979741	0.0146961	0.0195948	0.0244935	0.0293922	0.0342909	0.0391897	0.0440884	0.0489871	0.0538858	0.0587845	0.0636832	0.0685819	0.0734806	0.0783793	0.083278	0.0881767	0.0930754	0.0979741	0.102873	0.107772	0.11267	0.117569	0.122468	0.127366	0.132265	0.137164	0.142063	0.146961	0.15186	0.156759	0.161657	0.166556	0.171455	0.176353	0.181252	0.186151
Isabela	Laterite	Philippines	16.6	122.3	1073000	1.073	62.3797	15.1673	77.547	0.0077547	0.0284597	0.0284597	0.0569195	0.0853792	0.113839	0.142299	0.170758	0.199218	0.227678	0.256138	0.284597	0.313057	0.341517	0.369977	0.398436	0.426896	0.455356	0.483816	0.512275	0.540735	0.569195	0.597655	0.626114	0.654574	0.683034	0.711493	0.739953	0.768413	0.796873	0.825332	0.853792	0.882252	0.910712	0.939171	0.967631	0.996091	1.02455	1.05301	1.08147
Yerilla	Laterite	Australia	-29.71	122.06	1031200	1.0312	1.11242	3.25292	4.36534	0.000436534	0.00160208	0.00160208	0.00320416	0.00480624	0.00640832	0.0080104	0.00961248	0.0112146	0.0128166	0.0144187	0.0160208	0.0176229	0.019225	0.020827	0.0224291	0.0240312	0.0256333	0.0272354	0.0288374	0.0304395	0.0320416	0.0336437	0.0352458	0.0368478	0.0384499	0.040052	0.0416541	0.0432562	0.0448583	0.0464603	0.0480624	0.0496645	0.0512666	0.0528687	0.0544707	0.0560728	0.0576749	0.059277	0.0608791
Norwest	Laterite	Brazil	-13.75	-60.34	1029140	1.02914	66.1996	17.1276	83.3273	0.00833273	0.0305811	0.0305811	0.0611622	0.0917433	0.122324	0.152906	0.183487	0.214068	0.244649	0.27523	0.305811	0.336392	0.366973	0.397554	0.428135	0.458717	0.489298	0.519879	0.55046	0.581041	0.611622	0.642203	0.672784	0.703365	0.733947	0.764528	0.795109	0.82569	0.856271	0.886852	0.917433	0.948014	0.978595	1.00918	1.03976	1.07034	1.10092	1.1315	1.16208
Dutwa	Laterite	Tanzania	-2.49	33.85	983000	0.983	6.69059	3.32335	10.0139	0.00100139	0.00367511	0.00367511	0.00735023	0.0110253	0.0147005	0.0183756	0.0220507	0.0257258	0.0294009	0.033076	0.0367511	0.0404263	0.0441014	0.0477765	0.0514516	0.0551267	0.0588018	0.0624769	0.0661521	0.0698272	0.0735023	0.0771774	0.0808525	0.0845276	0.0882028	0.0918779	0.095553	0.0992281	0.102903	0.106578	0.110253	0.113929	0.117604	0.121279	0.124954	0.128629	0.132304	0.135979	0.139654
Clean TeQ Sunrise	Laterite	Australia	-32.76	147.42	935000	0.935	12.9407	8.6816	21.6223	0.00216223	0.0079354	0.0079354	0.0158708	0.0238062	0.0317416	0.039677	0.0476124	0.0555478	0.0634832	0.0714186	0.079354	0.0872894	0.0952247	0.10316	0.111096	0.119031	0.126966	0.134902	0.142837	0.150773	0.158708	0.166643	0.174579	0.182514	0.190449	0.198385	0.20632	0.214256	0.222191	0.230126	0.238062	0.245997	0.253933	0.261868	0.269803	0.277739	0.285674	0.29361	0.301545
Lubalisi	Laterite	Tanzania	-5.9	30.09	920000	0.92	41.818	16.4641	58.282	0.0058282	0.0213895	0.0213895	0.042779	0.0641685	0.085558	0.106948	0.128337	0.149727	0.171116	0.192506	0.213895	0.235285	0.256674	0.278064	0.299453	0.320843	0.342232	0.363622	0.385011	0.406401	0.42779	0.44918	0.470569	0.491959	0.513348	0.534738	0.556127	0.577517	0.598906	0.620296	0.641685	0.663075	0.684464	0.705854	0.727243	0.748633	0.770022	0.791412	0.812801
Niwest	Laterite	Australia	-28.67	121.71	878000	0.878	0.448098	1.72098	2.16908	0.000216908	0.000796052	0.000796052	0.0015921	0.00238816	0.00318421	0.00398026	0.00477631	0.00557237	0.00636842	0.00716447	0.00796052	0.00875657	0.00955263	0.0103487	0.0111447	0.0119408	0.0127368	0.0135329	0.0143289	0.015125	0.015921	0.0167171	0.0175131	0.0183092	0.0191053	0.0199013	0.0206974	0.0214934	0.0222895	0.0230855	0.0238816	0.0246776	0.0254737	0.0262697	0.0270658	0.0278618	0.0286579	0.0294539	0.03025
Cendrawana	Laterite	Indonesia	-2.52	138.88	834000	0.834	116.419	28.2736	144.692	0.0144692	0.0531021	0.0531021	0.106204	0.159306	0.212408	0.26551	0.318613	0.371715	0.424817	0.477919	0.531021	0.584123	0.637225	0.690327	0.743429	0.796531	0.849634	0.902736	0.955838	1.00894	1.06204	1.11514	1.16825	1.22135	1.27445	1.32755	1.38065	1.43376	1.48686	1.53996	1.59306	1.64616	1.69927	1.75237	1.80547	1.85857	1.91168	1.96478	2.01788
Morro Sem Bone	Laterite	Brazil	-13.19	-60.29	827000	0.827	74.5334	17.7543	92.2877	0.00922877	0.0338696	0.0338696	0.0677392	0.101609	0.135478	0.169348	0.203218	0.237087	0.270957	0.304826	0.338696	0.372565	0.406435	0.440305	0.474174	0.508044	0.541913	0.575783	0.609653	0.643522	0.677392	0.711261	0.745131	0.779	0.81287	0.84674	0.880609	0.914479	0.948348	0.982218	1.01609	1.04996	1.08383	1.1177	1.15157	1.18544	1.21931	1.25317	1.28704
Shevchenko	Laterite	Kazakhstan	51.93	60.87	825000	0.825	0.675339	2.18977	2.8651	0.00028651	0.00105149	0.00105149	0.00210299	0.00315448	0.00420597	0.00525747	0.00630896	0.00736045	0.00841195	0.00946344	0.0105149	0.0115664	0.0126179	0.0136694	0.0147209	0.0157724	0.0168239	0.0178754	0.0189269	0.0199784	0.0210299	0.0220814	0.0231329	0.0241843	0.0252358	0.0262873	0.0273388	0.0283903	0.0294418	0.0304933	0.0315448	0.0325963	0.0336478	0.0346993	0.0357508	0.0368023	0.0378538	0.0389053	0.0399568
Cameroon East	Laterite	Cameroon	3.33	13.83	784221	0.784221	130.351	30.1921	160.543	0.0160543	0.0589193	0.0589193	0.117839	0.176758	0.235677	0.294597	0.353516	0.412435	0.471355	0.530274	0.589193	0.648113	0.707032	0.765951	0.824871	0.88379	0.942709	1.00163	1.06055	1.11947	1.17839	1.23731	1.29623	1.35514	1.41406	1.47298	1.5319	1.59082	1.64974	1.70866	1.76758	1.8265	1.88542	1.94434	2.00326	2.06218	2.1211	2.18002	2.23893
SCONI	Laterite	Australia	-19.01	144.93	735979	0.735979	15.1654	22.0742	37.2396	0.00372396	0.0136669	0.0136669	0.0273339	0.0410008	0.0546678	0.0683347	0.0820017	0.0956686	0.109336	0.123003	0.136669	0.150336	0.164003	0.17767	0.191337	0.205004	0.218671	0.232338	0.246005	0.259672	0.273339	0.287006	0.300673	0.31434	0.328007	0.341674	0.355341	0.369008	0.382674	0.396341	0.410008	0.423675	0.437342	0.451009	0.464676	0.478343	0.49201	0.505677	0.519344
Toronto	Laterite	Philippines	9.22	118.25	696000	0.696	62.6575	15.8949	78.5525	0.00785525	0.0288288	0.0288288	0.0576575	0.0864863	0.115315	0.144144	0.172973	0.201801	0.23063	0.259459	0.288288	0.317116	0.345945	0.374774	0.403603	0.432431	0.46126	0.490089	0.518918	0.547746	0.576575	0.605404	0.634233	0.663061	0.69189	0.720719	0.749548	0.778376	0.807205	0.836034	0.864863	0.893691	0.92252	0.951349	0.980178	1.00901	1.03784	1.06666	1.09549
Siduarsi	Laterite	Indonesia	-2.52	138.88	679000	0.679	116.419	28.2736	144.692	0.0144692	0.0531021	0.0531021	0.106204	0.159306	0.212408	0.26551	0.318613	0.371715	0.424817	0.477919	0.531021	0.584123	0.637225	0.690327	0.743429	0.796531	0.849634	0.902736	0.955838	1.00894	1.06204	1.11514	1.16825	1.22135	1.27445	1.32755	1.38065	1.43376	1.48686	1.53996	1.59306	1.64616	1.69927	1.75237	1.80547	1.85857	1.91168	1.96478	2.01788
Celestial	Laterite	Philippines	8.91	117.89	649200	0.6492	44.2035	12.523	56.7265	0.00567265	0.0208186	0.0208186	0.0416372	0.0624558	0.0832744	0.104093	0.124912	0.14573	0.166549	0.187367	0.208186	0.229005	0.249823	0.270642	0.291461	0.312279	0.333098	0.353916	0.374735	0.395554	0.416372	0.437191	0.458009	0.478828	0.499647	0.520465	0.541284	0.562102	0.582921	0.60374	0.624558	0.645377	0.666196	0.687014	0.707833	0.728651	0.74947	0.770289	0.791107
Gladstone	Laterite	Australia	-23.06	149.89	647000	0.647	14.2983	14.3211	28.6194	0.00286194	0.0105033	0.0105033	0.0210066	0.0315099	0.0420132	0.0525166	0.0630199	0.0735232	0.0840265	0.0945298	0.105033	0.115536	0.12604	0.136543	0.147046	0.15755	0.168053	0.178556	0.18906	0.199563	0.210066	0.22057	0.231073	0.241576	0.252079	0.262583	0.273086	0.283589	0.294093	0.304596	0.315099	0.325603	0.336106	0.346609	0.357113	0.367616	0.378119	0.388623	0.399126
Subayin	Laterite	Indonesia	0.73	127.56	638000	0.638	82.0188	19.5433	101.562	0.0101562	0.0372733	0.0372733	0.0745466	0.11182	0.149093	0.186366	0.22364	0.260913	0.298186	0.33546	0.372733	0.410006	0.44728	0.484553	0.521826	0.559099	0.596373	0.633646	0.670919	0.708193	0.745466	0.782739	0.820013	0.857286	0.894559	0.931832	0.969106	1.00638	1.04365	1.08093	1.1182	1.15547	1.19275	1.23002	1.26729	1.30457	1.34184	1.37911	1.41639
Eucalyptus	Laterite	Australia	-29.08	122.18	633000	0.633	0.440567	1.77423	2.2148	0.00022148	0.00081283	0.00081283	0.00162566	0.00243849	0.00325132	0.00406415	0.00487698	0.00568981	0.00650264	0.00731547	0.0081283	0.00894113	0.00975396	0.0105668	0.0113796	0.0121925	0.0130053	0.0138181	0.0146309	0.0154438	0.0162566	0.0170694	0.0178823	0.0186951	0.0195079	0.0203208	0.0211336	0.0219464	0.0227592	0.0235721	0.0243849	0.0251977	0.0260106	0.0268234	0.0276362	0.0284491	0.0292619	0.0300747	0.0308876
Young	Laterite	Australia	-34.17	148.05	589000	0.589	4.77617	1.51988	6.29605	0.000629605	0.00231065	0.00231065	0.0046213	0.00693195	0.0092426	0.0115533	0.0138639	0.0161746	0.0184852	0.0207959	0.0231065	0.0254172	0.0277278	0.0300385	0.0323491	0.0346598	0.0369704	0.0392811	0.0415917	0.0439024	0.046213	0.0485237	0.0508343	0.053145	0.0554556	0.0577663	0.0600769	0.0623876	0.0646982	0.0670089	0.0693195	0.0716302	0.0739408	0.0762515	0.0785621	0.0808728	0.0831834	0.0854941	0.0878047
Wiluna	Laterite	Australia	-26.5	120.15	585000	0.585	0.596059	1.94951	2.54557	0.000254557	0.000934223	0.000934223	0.00186845	0.00280267	0.00373689	0.00467111	0.00560534	0.00653956	0.00747378	0.00840801	0.00934223	0.0102765	0.0112107	0.0121449	0.0130791	0.0140133	0.0149476	0.0158818	0.016816	0.0177502	0.0186845	0.0196187	0.0205529	0.0214871	0.0224213	0.0233556	0.0242898	0.025224	0.0261582	0.0270925	0.0280267	0.0289609	0.0298951	0.0308294	0.0317636	0.0326978	0.033632	0.0345662	0.0355005
Sentani	Laterite	Indonesia	-2.58	140.53	580000	0.58	51.0744	12.3778	63.4522	0.00634522	0.0232869	0.0232869	0.0465739	0.0698608	0.0931478	0.116435	0.139722	0.163009	0.186296	0.209582	0.232869	0.256156	0.279443	0.30273	0.326017	0.349304	0.372591	0.395878	0.419165	0.442452	0.465739	0.489026	0.512313	0.5356	0.558887	0.582173	0.60546	0.628747	0.652034	0.675321	0.698608	0.721895	0.745182	0.768469	0.791756	0.815043	0.83833	0.861617	0.884904
Bulanjao	Laterite	Philippines	8.56	117.42	580000	0.58	38.5418	11.0858	49.6276	0.00496276	0.0182133	0.0182133	0.0364267	0.05464	0.0728533	0.0910666	0.10928	0.127493	0.145707	0.16392	0.182133	0.200347	0.21856	0.236773	0.254987	0.2732	0.291413	0.309627	0.32784	0.346053	0.364267	0.38248	0.400693	0.418907	0.43712	0.455333	0.473547	0.49176	0.509973	0.528187	0.5464	0.564613	0.582827	0.60104	0.619253	0.637467	0.65568	0.673893	0.692106
Gogota	Laterite	Guinea	7.75	-8.49	573040	0.57304	23.8104	7.68215	31.4925	0.00314925	0.0115578	0.0115578	0.0231155	0.0346733	0.0462311	0.0577888	0.0693466	0.0809043	0.0924621	0.10402	0.115578	0.127135	0.138693	0.150251	0.161809	0.173366	0.184924	0.196482	0.20804	0.219598	0.231155	0.242713	0.254271	0.265829	0.277386	0.288944	0.300502	0.31206	0.323617	0.335175	0.346733	0.358291	0.369848	0.381406	0.392964	0.404522	0.416079	0.427637	0.439195
Kalia	Laterite	Guinea	10.15	-10.94	544090	0.54409	26.6403	17.7941	44.4345	0.00444345	0.0163075	0.0163075	0.0326149	0.0489224	0.0652298	0.0815373	0.0978447	0.114152	0.13046	0.146767	0.163075	0.179382	0.195689	0.211997	0.228304	0.244612	0.260919	0.277227	0.293534	0.309842	0.326149	0.342456	0.358764	0.375071	0.391379	0.407686	0.423994	0.440301	0.456609	0.472916	0.489224	0.505531	0.521838	0.538146	0.554453	0.570761	0.587068	0.603376	0.619683
Cyclops	Laterite	Indonesia	-2.46	140.36	485000	0.485	132.214	31.2581	163.472	0.0163472	0.0599944	0.0599944	0.119989	0.179983	0.239978	0.299972	0.359966	0.419961	0.479955	0.53995	0.599944	0.659938	0.719933	0.779927	0.839922	0.899916	0.95991	1.0199	1.0799	1.13989	1.19989	1.25988	1.31988	1.37987	1.43987	1.49986	1.55985	1.61985	1.67984	1.73984	1.79983	1.85983	1.91982	1.97982	2.03981	2.0998	2.1598	2.21979	2.27979
Manicani	Laterite	Philippines	10.99	125.64	472000	0.472	30.1792	8.63542	38.8146	0.00388146	0.014245	0.014245	0.0284899	0.0427349	0.0569798	0.0712248	0.0854697	0.0997147	0.11396	0.128205	0.14245	0.156694	0.170939	0.185184	0.199429	0.213674	0.227919	0.242164	0.256409	0.270654	0.284899	0.299144	0.313389	0.327634	0.341879	0.356124	0.370369	0.384614	0.398859	0.413104	0.427349	0.441594	0.455838	0.470083	0.484328	0.498573	0.512818	0.527063	0.541308
Bahodopi	Laterite	Indonesia	-2.71	121.95	451000	0.451	84.8685	20.3395	105.208	0.0105208	0.0386113	0.0386113	0.0772226	0.115834	0.154445	0.193057	0.231668	0.270279	0.308891	0.347502	0.386113	0.424724	0.463336	0.501947	0.540558	0.57917	0.617781	0.656392	0.695004	0.733615	0.772226	0.810838	0.849449	0.88806	0.926672	0.965283	1.00389	1.04251	1.08112	1.11973	1.15834	1.19695	1.23556	1.27417	1.31278	1.3514	1.39001	1.42862	1.46723
Devolli	Laterite	Albania	40.61	21.02	432000	0.432	4.03595	2.30319	6.33914	0.000633914	0.00232646	0.00232646	0.00465293	0.00697939	0.00930586	0.0116323	0.0139588	0.0162853	0.0186117	0.0209382	0.0232646	0.0255911	0.0279176	0.030244	0.0325705	0.034897	0.0372234	0.0395499	0.0418764	0.0442028	0.0465293	0.0488558	0.0511822	0.0535087	0.0558352	0.0581616	0.0604881	0.0628145	0.065141	0.0674675	0.0697939	0.0721204	0.0744469	0.0767733	0.0790998	0.0814263	0.0837527	0.0860792	0.0884057
Brooke's Point	Laterite	Philippines	8.96	117.82	428000	0.428	82.3877	21.5191	103.907	0.0103907	0.0381338	0.0381338	0.0762676	0.114401	0.152535	0.190669	0.228803	0.266937	0.305071	0.343204	0.381338	0.419472	0.457606	0.49574	0.533874	0.572007	0.610141	0.648275	0.686409	0.724543	0.762676	0.80081	0.838944	0.877078	0.915212	0.953346	0.991479	1.02961	1.06775	1.10588	1.14401	1.18215	1.22028	1.25842	1.29655	1.33468	1.37282	1.41095	1.44909
Morro do Engenho	Laterite	Brazil	-15.53	-51.67	421000	0.421	20.0184	10.4682	30.4867	0.00304867	0.0111886	0.0111886	0.0223772	0.0335658	0.0447544	0.055943	0.0671316	0.0783202	0.0895088	0.100697	0.111886	0.123075	0.134263	0.145452	0.15664	0.167829	0.179018	0.190206	0.201395	0.212583	0.223772	0.234961	0.246149	0.257338	0.268526	0.279715	0.290904	0.302092	0.313281	0.324469	0.335658	0.346847	0.358035	0.369224	0.380412	0.391601	0.40279	0.413978	0.425167
Caldag	Laterite	Turkey	38.9	27.73	375000	0.375	1.86395	1.59938	3.46333	0.000346333	0.00127104	0.00127104	0.00254209	0.00381313	0.00508417	0.00635522	0.00762626	0.0088973	0.0101683	0.0114394	0.0127104	0.0139815	0.0152525	0.0165236	0.0177946	0.0190656	0.0203367	0.0216077	0.0228788	0.0241498	0.0254209	0.0266919	0.027963	0.029234	0.030505	0.0317761	0.0330471	0.0343182	0.0355892	0.0368603	0.0381313	0.0394023	0.0406734	0.0419444	0.0432155	0.0444865	0.0457576	0.0470286	0.0482996
Kokogllave	Laterite	Albania	40.63	21	322000	0.322	4.26321	2.48741	6.75062	0.000675062	0.00247748	0.00247748	0.00495495	0.00743243	0.00990991	0.0123874	0.0148649	0.0173423	0.0198198	0.0222973	0.0247748	0.0272522	0.0297297	0.0322072	0.0346847	0.0371621	0.0396396	0.0421171	0.0445946	0.0470721	0.0495495	0.052027	0.0545045	0.056982	0.0594594	0.0619369	0.0644144	0.0668919	0.0693693	0.0718468	0.0743243	0.0768018	0.0792792	0.0817567	0.0842342	0.0867117	0.0891892	0.0916666	0.0941441
Ulugan	Laterite	Philippines	10.05	118.76	313000	0.313	59.8593	14.1679	74.0272	0.00740272	0.027168	0.027168	0.054336	0.081504	0.108672	0.13584	0.163008	0.190176	0.217344	0.244512	0.27168	0.298848	0.326016	0.353184	0.380352	0.40752	0.434688	0.461856	0.489024	0.516192	0.54336	0.570528	0.597696	0.624864	0.652032	0.6792	0.706368	0.733536	0.760704	0.787872	0.81504	0.842208	0.869376	0.896544	0.923712	0.95088	0.978048	1.00522	1.03238
Sukinda Valley	Laterite	India	21.02	85.75	300000	0.3	1.65691	0.762593	2.41951	0.000241951	0.000887959	0.000887959	0.00177592	0.00266388	0.00355184	0.00443979	0.00532775	0.00621571	0.00710367	0.00799163	0.00887959	0.00976755	0.0106555	0.0115435	0.0124314	0.0133194	0.0142073	0.0150953	0.0159833	0.0168712	0.0177592	0.0186471	0.0195351	0.0204231	0.021311	0.022199	0.0230869	0.0239749	0.0248628	0.0257508	0.0266388	0.0275267	0.0284147	0.0293026	0.0301906	0.0310786	0.0319665	0.0328545	0.0337424
Zambales	Laterite	Philippines	15.77	120.05	270000	0.27	29.9541	8.31457	38.2686	0.00382686	0.0140446	0.0140446	0.0280892	0.0421338	0.0561784	0.070223	0.0842675	0.0983121	0.112357	0.126401	0.140446	0.154491	0.168535	0.18258	0.196624	0.210669	0.224713	0.238758	0.252803	0.266847	0.280892	0.294936	0.308981	0.323026	0.33707	0.351115	0.365159	0.379204	0.393249	0.407293	0.421338	0.435382	0.449427	0.463472	0.477516	0.491561	0.505605	0.51965	0.533694
Gornostai	Laterite	Kazakhstan	50.56	78.81	235000	0.235	0.64323	2.9072	3.55043	0.000355043	0.00130301	0.00130301	0.00260602	0.00390903	0.00521204	0.00651505	0.00781806	0.00912107	0.0104241	0.0117271	0.0130301	0.0143331	0.0156361	0.0169391	0.0182421	0.0195451	0.0208482	0.0221512	0.0234542	0.0247572	0.0260602	0.0273632	0.0286662	0.0299692	0.0312722	0.0325752	0.0338782	0.0351813	0.0364843	0.0377873	0.0390903	0.0403933	0.0416963	0.0429993	0.0443023	0.0456053	0.0469083	0.0482114	0.0495144
Marlborough	Laterite	Australia	-22.94	149.83	220000	0.22	43.0335	17.0118	60.0453	0.00600453	0.0220366	0.0220366	0.0440732	0.0661098	0.0881465	0.110183	0.13222	0.154256	0.176293	0.19833	0.220366	0.242403	0.264439	0.286476	0.308513	0.330549	0.352586	0.374622	0.396659	0.418696	0.440732	0.462769	0.484806	0.506842	0.528879	0.550915	0.572952	0.594989	0.617025	0.639062	0.661098	0.683135	0.705172	0.727208	0.749245	0.771282	0.793318	0.815355	0.837391
Zanzui	Laterite	Tanzania	-2.93	33.82	219510	0.21951	5.2476	5.0566	10.3042	0.00103042	0.00378164	0.00378164	0.00756328	0.0113449	0.0151266	0.0189082	0.0226898	0.0264715	0.0302531	0.0340347	0.0378164	0.041598	0.0453797	0.0491613	0.0529429	0.0567246	0.0605062	0.0642879	0.0680695	0.0718511	0.0756328	0.0794144	0.083196	0.0869777	0.0907593	0.094541	0.0983226	0.102104	0.105886	0.109668	0.113449	0.117231	0.121012	0.124794	0.128576	0.132357	0.136139	0.139921	0.143702
Canegrass	Laterite	Australia	-30.28	120.97	209000	0.209	7.65832	8.00654	15.6649	0.00156649	0.005749	0.005749	0.011498	0.017247	0.022996	0.028745	0.034494	0.040243	0.045992	0.051741	0.05749	0.063239	0.068988	0.074737	0.080486	0.086235	0.091984	0.0977331	0.103482	0.109231	0.11498	0.120729	0.126478	0.132227	0.137976	0.143725	0.149474	0.155223	0.160972	0.166721	0.17247	0.178219	0.183968	0.189717	0.195466	0.201215	0.206964	0.212713	0.218462
Gasquet Mountain	Laterite	USA	41.84	-124.01	208605	0.208605	112.796	27.7395	140.535	0.0140535	0.0515765	0.0515765	0.103153	0.154729	0.206306	0.257882	0.309459	0.361035	0.412612	0.464188	0.515765	0.567341	0.618918	0.670494	0.722071	0.773647	0.825224	0.8768	0.928377	0.979953	1.03153	1.08311	1.13468	1.18626	1.23784	1.28941	1.34099	1.39257	1.44414	1.49572	1.54729	1.59887	1.65045	1.70202	1.7536	1.80518	1.85675	1.90833	1.95991
Kulikovskoye	Laterite	Russia	53.66	60	204000	0.204	6.29095	2.80599	9.09694	0.000909694	0.00333858	0.00333858	0.00667716	0.0100157	0.0133543	0.0166929	0.0200315	0.02337	0.0267086	0.0300472	0.0333858	0.0367244	0.0400629	0.0434015	0.0467401	0.0500787	0.0534173	0.0567558	0.0600944	0.063433	0.0667716	0.0701101	0.0734487	0.0767873	0.0801259	0.0834645	0.086803	0.0901416	0.0934802	0.0968188	0.100157	0.103496	0.106835	0.110173	0.113512	0.11685	0.120189	0.123527	0.126866
Skroska	Laterite	Albania	41.09	20.5	201177	0.201177	7.57616	4.40379	11.98	0.001198	0.00439664	0.00439664	0.00879328	0.0131899	0.0175866	0.0219832	0.0263799	0.0307765	0.0351731	0.0395698	0.0439664	0.0483631	0.0527597	0.0571563	0.061553	0.0659496	0.0703463	0.0747429	0.0791396	0.0835362	0.0879328	0.0923295	0.0967261	0.101123	0.105519	0.109916	0.114313	0.118709	0.123106	0.127503	0.131899	0.136296	0.140693	0.145089	0.149486	0.153882	0.158279	0.162676	0.167072
Irwin-Coglia	Laterite	Australia	-29.14	123.05	192000	0.192	1.48741	3.91553	5.40293	0.000540293	0.00198288	0.00198288	0.00396575	0.00594863	0.00793151	0.00991438	0.0118973	0.0138801	0.015863	0.0178459	0.0198288	0.0218116	0.0237945	0.0257774	0.0277603	0.0297432	0.031726	0.0337089	0.0356918	0.0376747	0.0396575	0.0416404	0.0436233	0.0456062	0.047589	0.0495719	0.0515548	0.0535377	0.0555205	0.0575034	0.0594863	0.0614692	0.0634521	0.0654349	0.0674178	0.0694007	0.0713836	0.0733664	0.0753493
Black Hill	Laterite	Australia	-30.92	121.85	192000	0.192	6.36185	9.74	16.1019	0.00161019	0.00590938	0.00590938	0.0118188	0.0177281	0.0236375	0.0295469	0.0354563	0.0413657	0.047275	0.0531844	0.0590938	0.0650032	0.0709126	0.0768219	0.0827313	0.0886407	0.0945501	0.100459	0.106369	0.112278	0.118188	0.124097	0.130006	0.135916	0.141825	0.147734	0.153644	0.159553	0.165463	0.171372	0.177281	0.183191	0.1891	0.19501	0.200919	0.206828	0.212738	0.218647	0.224556
Valozoro	Laterite	Madagascar	-20.83	47.24	191000	0.191	19.0259	10.0764	29.1023	0.00291023	0.0106806	0.0106806	0.0213611	0.0320417	0.0427222	0.0534028	0.0640833	0.0747639	0.0854444	0.096125	0.106806	0.117486	0.128167	0.138847	0.149528	0.160208	0.170889	0.181569	0.19225	0.202931	0.213611	0.224292	0.234972	0.245653	0.256333	0.267014	0.277694	0.288375	0.299056	0.309736	0.320417	0.331097	0.341778	0.352458	0.363139	0.373819	0.3845	0.395181	0.405861
Buena Vista	Laterite	Guatemala	14.99	-90.94	180000	0.18	33.5286	12.8743	46.4029	0.00464029	0.0170298	0.0170298	0.0340597	0.0510895	0.0681194	0.0851492	0.102179	0.119209	0.136239	0.153269	0.170298	0.187328	0.204358	0.221388	0.238418	0.255448	0.272478	0.289507	0.306537	0.323567	0.340597	0.357627	0.374657	0.391687	0.408716	0.425746	0.442776	0.459806	0.476836	0.493866	0.510895	0.527925	0.544955	0.561985	0.579015	0.596045	0.613075	0.630104	0.647134
Libjo	Laterite	Philippines	10.17	125.51	172000	0.172	42.6415	11.2105	53.8521	0.00538521	0.0197637	0.0197637	0.0395274	0.0592911	0.0790549	0.0988186	0.118582	0.138346	0.15811	0.177873	0.197637	0.217401	0.237165	0.256928	0.276692	0.296456	0.316219	0.335983	0.355747	0.375511	0.395274	0.415038	0.434802	0.454565	0.474329	0.494093	0.513857	0.53362	0.553384	0.573148	0.592911	0.612675	0.632439	0.652203	0.671966	0.69173	0.711494	0.731258	0.751021
Quicksilver	Laterite	Australia	-32.77	118.67	168500	0.1685	3.58794	2.67326	6.26119	0.000626119	0.00229786	0.00229786	0.00459572	0.00689357	0.00919143	0.0114893	0.0137871	0.016085	0.0183829	0.0206807	0.0229786	0.0252764	0.0275743	0.0298722	0.03217	0.0344679	0.0367657	0.0390636	0.0413614	0.0436593	0.0459572	0.048255	0.0505529	0.0528507	0.0551486	0.0574465	0.0597443	0.0620422	0.06434	0.0666379	0.0689357	0.0712336	0.0735315	0.0758293	0.0781272	0.080425	0.0827229	0.0850208	0.0873186
Homeville	Laterite	Australia	-32.01	147.04	162000	0.162	2.7964	3.43043	6.22683	0.000622683	0.00228525	0.00228525	0.00457049	0.00685574	0.00914099	0.0114262	0.0137115	0.0159967	0.018282	0.0205672	0.0228525	0.0251377	0.027423	0.0297082	0.0319935	0.0342787	0.036564	0.0388492	0.0411345	0.0434197	0.0457049	0.0479902	0.0502754	0.0525607	0.0548459	0.0571312	0.0594164	0.0617017	0.0639869	0.0662722	0.0685574	0.0708427	0.0731279	0.0754132	0.0776984	0.0799837	0.0822689	0.0845542	0.0868394
Mwetaung	Laterite	Myanmar	23.41	94.01	150000	0.15	37.7943	10.8934	48.6877	0.00486877	0.0178684	0.0178684	0.0357368	0.0536052	0.0714735	0.0893419	0.10721	0.125079	0.142947	0.160815	0.178684	0.196552	0.214421	0.232289	0.250157	0.268026	0.285894	0.303763	0.321631	0.339499	0.357368	0.375236	0.393105	0.410973	0.428841	0.44671	0.464578	0.482446	0.500315	0.518183	0.536052	0.55392	0.571788	0.589657	0.607525	0.625394	0.643262	0.66113	0.678999
Kepha	Laterite	Philippines	9.43	125.75	148000	0.148	82.1841	19.55	101.734	0.0101734	0.0373364	0.0373364	0.0746728	0.112009	0.149346	0.186682	0.224018	0.261355	0.298691	0.336028	0.373364	0.4107	0.448037	0.485373	0.52271	0.560046	0.597382	0.634719	0.672055	0.709392	0.746728	0.784065	0.821401	0.858737	0.896074	0.93341	0.970747	1.00808	1.04542	1.08276	1.12009	1.15743	1.19476	1.2321	1.26944	1.30677	1.34411	1.38145	1.41878
Pulot	Laterite	Philippines	9.07	117.96	145000	0.145	58.8744	15.0789	73.9533	0.00739533	0.0271408	0.0271408	0.0542817	0.0814225	0.108563	0.135704	0.162845	0.189986	0.217127	0.244268	0.271408	0.298549	0.32569	0.352831	0.379972	0.407113	0.434253	0.461394	0.488535	0.515676	0.542817	0.569958	0.597099	0.624239	0.65138	0.678521	0.705662	0.732803	0.759944	0.787084	0.814225	0.841366	0.868507	0.895648	0.922789	0.94993	0.97707	1.00421	1.03135
Barnes Hill	Laterite	Australia	-41.21	146.77	144378	0.144378	110.26	27.7363	137.996	0.0137996	0.0506445	0.0506445	0.101289	0.151933	0.202578	0.253222	0.303867	0.354511	0.405156	0.4558	0.506445	0.557089	0.607734	0.658378	0.709023	0.759667	0.810312	0.860956	0.9116	0.962245	1.01289	1.06353	1.11418	1.16482	1.21547	1.26611	1.31676	1.3674	1.41805	1.46869	1.51933	1.56998	1.62062	1.67127	1.72191	1.77256	1.8232	1.87385	1.92449
Vila Oito	Laterite	Brazil	-7.87	-49.34	141000	0.141	16.4952	6.91043	23.4056	0.00234056	0.00858987	0.00858987	0.0171797	0.0257696	0.0343595	0.0429494	0.0515392	0.0601291	0.068719	0.0773088	0.0858987	0.0944886	0.103078	0.111668	0.120258	0.128848	0.137438	0.146028	0.154618	0.163208	0.171797	0.180387	0.188977	0.197567	0.206157	0.214747	0.223337	0.231927	0.240516	0.249106	0.257696	0.266286	0.274876	0.283466	0.292056	0.300645	0.309235	0.317825	0.326415
Mt Thirsty	Laterite	Australia	-32.1	121.64	139100	0.1391	38.8615	24.743	63.6045	0.00636045	0.0233429	0.0233429	0.0466857	0.0700286	0.0933714	0.116714	0.140057	0.1634	0.186743	0.210086	0.233429	0.256771	0.280114	0.303457	0.3268	0.350143	0.373486	0.396829	0.420171	0.443514	0.466857	0.4902	0.513543	0.536886	0.560229	0.583572	0.606914	0.630257	0.6536	0.676943	0.700286	0.723629	0.746972	0.770314	0.793657	0.817	0.840343	0.863686	0.887029
Pine Flat	Laterite	USA	41.99	-123.99	136000	0.136	70.5322	25.9923	96.5245	0.00965245	0.0354245	0.0354245	0.070849	0.106273	0.141698	0.177122	0.212547	0.247971	0.283396	0.31882	0.354245	0.389669	0.425094	0.460518	0.495943	0.531367	0.566792	0.602216	0.637641	0.673065	0.70849	0.743914	0.779339	0.814763	0.850188	0.885612	0.921037	0.956461	0.991885	1.02731	1.06273	1.09816	1.13358	1.16901	1.20443	1.23986	1.27528	1.31071	1.34613
Summervale	Laterite	Australia	-31.43	147.03	133000	0.133	3.49667	4.20432	7.70099	0.000770099	0.00282626	0.00282626	0.00565252	0.00847879	0.011305	0.0141313	0.0169576	0.0197838	0.0226101	0.0254364	0.0282626	0.0310889	0.0339151	0.0367414	0.0395677	0.0423939	0.0452202	0.0480465	0.0508727	0.053699	0.0565252	0.0593515	0.0621778	0.065004	0.0678303	0.0706566	0.0734828	0.0763091	0.0791353	0.0819616	0.0847879	0.0876141	0.0904404	0.0932666	0.0960929	0.0989192	0.101745	0.104572	0.107398
Duck Hill	Laterite	Australia	-29.51	122.27	118000	0.118	0.352826	1.49595	1.84877	0.000184877	0.000678499	0.000678499	0.001357	0.0020355	0.002714	0.0033925	0.00407099	0.00474949	0.00542799	0.00610649	0.00678499	0.00746349	0.00814199	0.00882049	0.00949899	0.0101775	0.010856	0.0115345	0.012213	0.0128915	0.01357	0.0142485	0.014927	0.0156055	0.016284	0.0169625	0.017641	0.0183195	0.018998	0.0196765	0.020355	0.0210335	0.021712	0.0223905	0.023069	0.0237475	0.024426	0.0251045	0.025783
Romblon	Laterite	Philippines	12.35	122.56	111433	0.111433	62.273	16.0024	78.2753	0.00782753	0.028727	0.028727	0.0574541	0.0861811	0.114908	0.143635	0.172362	0.201089	0.229816	0.258543	0.28727	0.315997	0.344724	0.373452	0.402179	0.430906	0.459633	0.48836	0.517087	0.545814	0.574541	0.603268	0.631995	0.660722	0.689449	0.718176	0.746903	0.77563	0.804357	0.833084	0.861811	0.890538	0.919265	0.947992	0.976719	1.00545	1.03417	1.0629	1.09163
Baie N'go	Laterite	New Caledonia	-22.29	166.71	107000	0.107	11.8795	15.9291	27.8086	0.00278086	0.0102058	0.0102058	0.0204115	0.0306173	0.040823	0.0510288	0.0612346	0.0714403	0.0816461	0.0918519	0.102058	0.112263	0.122469	0.132675	0.142881	0.153086	0.163292	0.173498	0.183704	0.193909	0.204115	0.214321	0.224527	0.234733	0.244938	0.255144	0.26535	0.275556	0.285761	0.295967	0.306173	0.316379	0.326584	0.33679	0.346996	0.357202	0.367407	0.377613	0.387819
Pyke Hill	Laterite	Australia	-29.04	122.15	103300	0.1033	0.483374	1.9698	2.45318	0.000245318	0.000900317	0.000900317	0.00180063	0.00270095	0.00360127	0.00450158	0.0054019	0.00630222	0.00720253	0.00810285	0.00900317	0.00990348	0.0108038	0.0117041	0.0126044	0.0135047	0.0144051	0.0153054	0.0162057	0.017106	0.0180063	0.0189066	0.019807	0.0207073	0.0216076	0.0225079	0.0234082	0.0243085	0.0252089	0.0261092	0.0270095	0.0279098	0.0288101	0.0297104	0.0306108	0.0315111	0.0324114	0.0333117	0.034212
Szklary	Laterite	Poland	50.63	16.83	100800	0.1008	11.0158	3.85376	14.8695	0.00148695	0.00545712	0.00545712	0.0109142	0.0163714	0.0218285	0.0272856	0.0327427	0.0381999	0.043657	0.0491141	0.0545712	0.0600283	0.0654855	0.0709426	0.0763997	0.0818568	0.087314	0.0927711	0.0982282	0.103685	0.109142	0.1146	0.120057	0.125514	0.130971	0.136428	0.141885	0.147342	0.152799	0.158257	0.163714	0.169171	0.174628	0.180085	0.185542	0.190999	0.196456	0.201914	0.207371
Cumpie Hill	Laterite	Dominican Republic	18.88	-70.28	92700	0.0927	36.5819	9.9254	46.5073	0.00465073	0.0170682	0.0170682	0.0341363	0.0512045	0.0682727	0.0853408	0.102409	0.119477	0.136545	0.153614	0.170682	0.18775	0.204818	0.221886	0.238954	0.256023	0.273091	0.290159	0.307227	0.324295	0.341363	0.358432	0.3755	0.392568	0.409636	0.426704	0.443772	0.460841	0.477909	0.494977	0.512045	0.529113	0.546181	0.56325	0.580318	0.597386	0.614454	0.631522	0.64859
Libjo	Laterite	Philippines	10.19	125.58	90000	0.09	45.8387	12.4092	58.2479	0.00582479	0.021377	0.021377	0.042754	0.064131	0.085508	0.106885	0.128262	0.149639	0.171016	0.192393	0.21377	0.235147	0.256524	0.277901	0.299278	0.320655	0.342032	0.363409	0.384786	0.406163	0.42754	0.448917	0.470294	0.491671	0.513048	0.534425	0.555802	0.577179	0.598556	0.619933	0.64131	0.662687	0.684064	0.705441	0.726818	0.748195	0.769572	0.790949	0.812326
Serra Azul Saprolite	Laterite	Brazil	-14.19	-39.72	75000	0.075	29.0557	9.04503	38.1007	0.00381007	0.013983	0.013983	0.0279659	0.0419489	0.0559319	0.0699149	0.0838978	0.0978808	0.111864	0.125847	0.13983	0.153813	0.167796	0.181779	0.195762	0.209745	0.223728	0.23771	0.251693	0.265676	0.279659	0.293642	0.307625	0.321608	0.335591	0.349574	0.363557	0.37754	0.391523	0.405506	0.419489	0.433472	0.447455	0.461438	0.475421	0.489404	0.503387	0.51737	0.531353
Haito	Laterite	Togo	7.23	0.9	71280	0.07128	19.1946	7.04975	26.2443	0.00262443	0.00963167	0.00963167	0.0192633	0.028895	0.0385267	0.0481583	0.05779	0.0674217	0.0770533	0.086685	0.0963167	0.105948	0.11558	0.125212	0.134843	0.144475	0.154107	0.163738	0.17337	0.183002	0.192633	0.202265	0.211897	0.221528	0.23116	0.240792	0.250423	0.260055	0.269687	0.279318	0.28895	0.298582	0.308213	0.317845	0.327477	0.337108	0.34674	0.356372	0.366003
Coronation Dam	Laterite	Australia	-29.52	122.27	56700	0.0567	0.347284	1.47543	1.82272	0.000182272	0.000668937	0.000668937	0.00133787	0.00200681	0.00267575	0.00334468	0.00401362	0.00468256	0.00535149	0.00602043	0.00668937	0.0073583	0.00802724	0.00869618	0.00936512	0.0100341	0.010703	0.0113719	0.0120409	0.0127098	0.0133787	0.0140477	0.0147166	0.0153855	0.0160545	0.0167234	0.0173924	0.0180613	0.0187302	0.0193992	0.0200681	0.020737	0.021406	0.0220749	0.0227439	0.0234128	0.0240817	0.0247507	0.0254196
Stone Corral	Laterite	USA	41.93	-124.01	50000	0.05	56.3773	25.3267	81.704	0.0081704	0.0299854	0.0299854	0.0599708	0.0899562	0.119942	0.149927	0.179912	0.209898	0.239883	0.269868	0.299854	0.329839	0.359825	0.38981	0.419795	0.449781	0.479766	0.509752	0.539737	0.569722	0.599708	0.629693	0.659678	0.689664	0.719649	0.749635	0.77962	0.809605	0.839591	0.869576	0.899562	0.929547	0.959532	0.989518	1.0195	1.04949	1.07947	1.10946	1.13944
Tarnavatskoye	Laterite	Ukraine	50.14	31.77	47000	0.047	13.5863	4.2754	17.8617	0.00178617	0.00655526	0.00655526	0.0131105	0.0196658	0.026221	0.0327763	0.0393316	0.0458868	0.0524421	0.0589973	0.0655526	0.0721079	0.0786631	0.0852184	0.0917737	0.0983289	0.104884	0.111439	0.117995	0.12455	0.131105	0.13766	0.144216	0.150771	0.157326	0.163882	0.170437	0.176992	0.183547	0.190103	0.196658	0.203213	0.209768	0.216324	0.222879	0.229434	0.235989	0.242545	0.2491
Toomey Hill	Laterite	Australia	-28.8	121.88	46000	0.046	0.521111	1.62667	2.14778	0.000214778	0.000788234	0.000788234	0.00157647	0.0023647	0.00315294	0.00394117	0.00472941	0.00551764	0.00630588	0.00709411	0.00788234	0.00867058	0.00945881	0.010247	0.0110353	0.0118235	0.0126118	0.0134	0.0141882	0.0149765	0.0157647	0.0165529	0.0173412	0.0181294	0.0189176	0.0197059	0.0204941	0.0212823	0.0220706	0.0228588	0.023647	0.0244353	0.0252235	0.0260117	0.0268	0.0275882	0.0283764	0.0291647	0.0299529
Larkin's Find	Laterite	Australia	-29.46	122.25	42000	0.042	0.574328	1.84951	2.42384	0.000242384	0.000889549	0.000889549	0.0017791	0.00266865	0.0035582	0.00444774	0.00533729	0.00622684	0.00711639	0.00800594	0.00889549	0.00978504	0.0106746	0.0115641	0.0124537	0.0133432	0.0142328	0.0151223	0.0160119	0.0169014	0.017791	0.0186805	0.0195701	0.0204596	0.0213492	0.0222387	0.0231283	0.0240178	0.0249074	0.0257969	0.0266865	0.027576	0.0284656	0.0293551	0.0302447	0.0311342	0.0320238	0.0329133	0.0338029
Waite Kauri	Laterite	Australia	-28.66	121.71	41000	0.041	0.449317	1.73329	2.18261	0.000218261	0.000801017	0.000801017	0.00160203	0.00240305	0.00320407	0.00400509	0.0048061	0.00560712	0.00640814	0.00720916	0.00801017	0.00881119	0.00961221	0.0104132	0.0112142	0.0120153	0.0128163	0.0136173	0.0144183	0.0152193	0.0160203	0.0168214	0.0176224	0.0184234	0.0192244	0.0200254	0.0208265	0.0216275	0.0224285	0.0232295	0.0240305	0.0248315	0.0256326	0.0264336	0.0272346	0.0280356	0.0288366	0.0296376	0.0304387
Owendale	Laterite	Australia	-32.69	147.47	40722	0.040722	5.67448	3.27129	8.94577	0.000894577	0.0032831	0.0032831	0.00656619	0.00984929	0.0131324	0.0164155	0.0196986	0.0229817	0.0262648	0.0295479	0.032831	0.0361141	0.0393972	0.0426803	0.0459634	0.0492464	0.0525295	0.0558126	0.0590957	0.0623788	0.0656619	0.068945	0.0722281	0.0755112	0.0787943	0.0820774	0.0853605	0.0886436	0.0919267	0.0952098	0.0984929	0.101776	0.105059	0.108342	0.111625	0.114908	0.118191	0.121475	0.124758
Botolan	Laterite	Philippines	15.31	120.08	37000	0.037	14.3683	3.71762	18.086	0.0018086	0.00663754	0.00663754	0.0132751	0.0199126	0.0265502	0.0331877	0.0398253	0.0464628	0.0531004	0.0597379	0.0663754	0.073013	0.0796505	0.0862881	0.0929256	0.0995632	0.106201	0.112838	0.119476	0.126113	0.132751	0.139388	0.146026	0.152664	0.159301	0.165939	0.172576	0.179214	0.185851	0.192489	0.199126	0.205764	0.212401	0.219039	0.225677	0.232314	0.238952	0.245589	0.252227
Alpha	Laterite	Philippines	9.2	118.22	35600	0.0356	49.4312	13.0192	62.4503	0.00624503	0.0229193	0.0229193	0.0458385	0.0687578	0.0916771	0.114596	0.137516	0.160435	0.183354	0.206273	0.229193	0.252112	0.275031	0.297951	0.32087	0.343789	0.366708	0.389628	0.412547	0.435466	0.458385	0.481305	0.504224	0.527143	0.550062	0.572982	0.595901	0.61882	0.64174	0.664659	0.687578	0.710497	0.733417	0.756336	0.779255	0.802174	0.825094	0.848013	0.870932
Boa	Laterite	Philippines	10.11	125.65	34700	0.0347	59.0414	14.6075	73.6488	0.00736488	0.0270291	0.0270291	0.0540582	0.0810874	0.108116	0.135146	0.162175	0.189204	0.216233	0.243262	0.270291	0.29732	0.324349	0.351379	0.378408	0.405437	0.432466	0.459495	0.486524	0.513553	0.540582	0.567612	0.594641	0.62167	0.648699	0.675728	0.702757	0.729786	0.756815	0.783845	0.810874	0.837903	0.864932	0.891961	0.91899	0.946019	0.973048	1.00008	1.02711
Krestovskoye	Laterite	Russia	56.02	60.25	34000	0.034	30.7439	13.6047	44.3486	0.00443486	0.0162759	0.0162759	0.0325519	0.0488278	0.0651038	0.0813797	0.0976556	0.113932	0.130208	0.146483	0.162759	0.179035	0.195311	0.211587	0.227863	0.244139	0.260415	0.276691	0.292967	0.309243	0.325519	0.341795	0.358071	0.374347	0.390623	0.406898	0.423174	0.43945	0.455726	0.472002	0.488278	0.504554	0.52083	0.537106	0.553382	0.569658	0.585934	0.60221	0.618486
Gulinskoye	Laterite	Russia	52.65	60.39	26000	0.026	1.55523	1.09097	2.64619	0.000264619	0.000971153	0.000971153	0.00194231	0.00291346	0.00388461	0.00485577	0.00582692	0.00679807	0.00776922	0.00874038	0.00971153	0.0106827	0.0116538	0.012625	0.0135961	0.0145673	0.0155384	0.0165096	0.0174808	0.0184519	0.0194231	0.0203942	0.0213654	0.0223365	0.0233077	0.0242788	0.02525	0.0262211	0.0271923	0.0281634	0.0291346	0.0301057	0.0310769	0.0320481	0.0330192	0.0339904	0.0349615	0.0359327	0.0369038
Riverina	Laterite	Australia	-29.74	120.56	22200	0.0222	7.35478	12.5314	19.8862	0.00198862	0.00729824	0.00729824	0.0145965	0.0218947	0.029193	0.0364912	0.0437894	0.0510877	0.0583859	0.0656842	0.0729824	0.0802806	0.0875789	0.0948771	0.102175	0.109474	0.116772	0.12407	0.131368	0.138667	0.145965	0.153263	0.160561	0.16786	0.175158	0.182456	0.189754	0.197052	0.204351	0.211649	0.218947	0.226245	0.233544	0.240842	0.24814	0.255438	0.262737	0.270035	0.277333
Sakharevskoye	Laterite	Russia	57.48	61.62	18000	0.018	40.4091	15.3404	55.7496	0.00557496	0.0204601	0.0204601	0.0409202	0.0613803	0.0818404	0.1023	0.122761	0.143221	0.163681	0.184141	0.204601	0.225061	0.245521	0.265981	0.286441	0.306901	0.327361	0.347822	0.368282	0.388742	0.409202	0.429662	0.450122	0.470582	0.491042	0.511502	0.531962	0.552422	0.572883	0.593343	0.613803	0.634263	0.654723	0.675183	0.695643	0.716103	0.736563	0.757023	0.777483
Waite Kauri	Laterite	Australia	-28.69	121.72	18000	0.018	0.398773	1.68405	2.08282	0.000208282	0.000764396	0.000764396	0.00152879	0.00229319	0.00305758	0.00382198	0.00458637	0.00535077	0.00611517	0.00687956	0.00764396	0.00840835	0.00917275	0.00993714	0.0107015	0.0114659	0.0122303	0.0129947	0.0137591	0.0145235	0.0152879	0.0160523	0.0168167	0.0175811	0.0183455	0.0191099	0.0198743	0.0206387	0.0214031	0.0221675	0.0229319	0.0236963	0.0244607	0.0252251	0.0259895	0.0267538	0.0275182	0.0282826	0.029047
Ghan Well	Laterite	Australia	-28.87	122.13	11900	0.0119	0.360049	1.52454	1.88459	0.000188459	0.000691643	0.000691643	0.00138329	0.00207493	0.00276657	0.00345822	0.00414986	0.0048415	0.00553315	0.00622479	0.00691643	0.00760808	0.00829972	0.00899136	0.00968301	0.0103747	0.0110663	0.0117579	0.0124496	0.0131412	0.0138329	0.0145245	0.0152162	0.0159078	0.0165994	0.0172911	0.0179827	0.0186744	0.019366	0.0200577	0.0207493	0.0214409	0.0221326	0.0228242	0.0235159	0.0242075	0.0248992	0.0255908	0.0262824
Tochilnogorskoye	Laterite	Russia	57.49	61.18	11000	0.011	26.3739	15.0683	41.4422	0.00414422	0.0152093	0.0152093	0.0304186	0.0456279	0.0608372	0.0760465	0.0912557	0.106465	0.121674	0.136884	0.152093	0.167302	0.182511	0.197721	0.21293	0.228139	0.243349	0.258558	0.273767	0.288977	0.304186	0.319395	0.334604	0.349814	0.365023	0.380232	0.395442	0.410651	0.42586	0.441069	0.456279	0.471488	0.486697	0.501907	0.517116	0.532325	0.547534	0.562744	0.577953
Manticao	Laterite	Philippines	8.35	124.39	11000	0.011	55.5615	14.0476	69.609	0.0069609	0.0255465	0.0255465	0.051093	0.0766396	0.102186	0.127733	0.153279	0.178826	0.204372	0.229919	0.255465	0.281012	0.306558	0.332105	0.357651	0.383198	0.408744	0.434291	0.459837	0.485384	0.51093	0.536477	0.562023	0.58757	0.613116	0.638663	0.66421	0.689756	0.715303	0.740849	0.766396	0.791942	0.817489	0.843035	0.868582	0.894128	0.919675	0.945221	0.970768
Lucky Break	Laterite	Australia	-19.47	145.69	8595	0.008595	9.19436	15.2908	24.4852	0.00244852	0.00898605	0.00898605	0.0179721	0.0269582	0.0359442	0.0449303	0.0539163	0.0629024	0.0718884	0.0808745	0.0898605	0.0988466	0.107833	0.116819	0.125805	0.134791	0.143777	0.152763	0.161749	0.170735	0.179721	0.188707	0.197693	0.206679	0.215665	0.224651	0.233637	0.242623	0.251609	0.260595	0.269582	0.278568	0.287554	0.29654	0.305526	0.314512	0.323498	0.332484	0.34147
Mt Cobalt	Laterite	Australia	-26.19	152.27	6981	0.006981	45.7136	22.5151	68.2287	0.00682287	0.0250399	0.0250399	0.0500799	0.0751198	0.10016	0.1252	0.15024	0.17528	0.200319	0.225359	0.250399	0.275439	0.300479	0.325519	0.350559	0.375599	0.400639	0.425679	0.450719	0.475759	0.500799	0.525839	0.550879	0.575919	0.600958	0.625998	0.651038	0.676078	0.701118	0.726158	0.751198	0.776238	0.801278	0.826318	0.851358	0.876398	0.901438	0.926478	0.951518
Pacific Express	Laterite	Australia	-31.57	152.79	6301	0.006301	86.9973	22.7713	109.769	0.0109769	0.0402851	0.0402851	0.0805702	0.120855	0.16114	0.201425	0.241711	0.281996	0.322281	0.362566	0.402851	0.443136	0.483421	0.523706	0.563991	0.604276	0.644561	0.684846	0.725132	0.765417	0.805702	0.845987	0.886272	0.926557	0.966842	1.00713	1.04741	1.0877	1.12798	1.16827	1.20855	1.24884	1.28912	1.32941	1.36969	1.40998	1.45026	1.49055	1.53083
Kungurskoye	Laterite	Russia	-31.6	121.79	19900	0.0199	17.9373	17.8884	35.8257	0.00358257	0.013148	0.013148	0.026296	0.0394441	0.0525921	0.0657401	0.0788881	0.0920362	0.105184	0.118332	0.13148	0.144628	0.157776	0.170924	0.184072	0.19722	0.210368	0.223516	0.236664	0.249812	0.26296	0.276108	0.289256	0.302405	0.315553	0.328701	0.341849	0.354997	0.368145	0.381293	0.394441	0.407589	0.420737	0.433885	0.447033	0.460181	0.473329	0.486477	0.499625
Sumas Mountain	Laterite	USA	48.9	-122.25	4700	0.0047	110.369	27.5507	137.92	0.013792	0.0506165	0.0506165	0.101233	0.15185	0.202466	0.253083	0.303699	0.354316	0.404932	0.455549	0.506165	0.556782	0.607398	0.658015	0.708631	0.759248	0.809865	0.860481	0.911098	0.961714	1.01233	1.06295	1.11356	1.16418	1.2148	1.26541	1.31603	1.36665	1.41726	1.46788	1.5185	1.56911	1.61973	1.67035	1.72096	1.77158	1.8222	1.87281	1.92343
South Dinagat	Laterite	Philippines	9.84	125.61	4600	0.0046	37.7142	10.1988	47.913	0.0047913	0.0175841	0.0175841	0.0351682	0.0527522	0.0703363	0.0879204	0.105504	0.123089	0.140673	0.158257	0.175841	0.193425	0.211009	0.228593	0.246177	0.263761	0.281345	0.298929	0.316513	0.334098	0.351682	0.369266	0.38685	0.404434	0.422018	0.439602	0.457186	0.47477	0.492354	0.509938	0.527522	0.545107	0.562691	0.580275	0.597859	0.615443	0.633027	0.650611	0.668195
[truncated: 162 more columns]
